# Supplementary material for: Ambiguities in solvation free energies from cluster-continuum quasichemical theory: lithium cation in protic and aprotic solvents
Source: Royal Society of Chemistry journal article supplement (doi:10.1039/d1cp01454d), 2021-01-01
Supplement: d1cp01454d1.pdf [file d1cp01454d1.pdf]

# Ambiguities in Solvation Free Energies from Cluster-Continuum Quasichemical Theory: Lithium Cation in Protic and Aprotic Solvents

*Daniil Itkis,<sup>‡,§,\*</sup> Luigi Cavallo,<sup>†,\*</sup> Lada V. Yashina<sup>§,‡,\*</sup> and Yury Minenkov<sup>‡,‡,\*</sup>*

<sup>‡</sup> N. N. Semenov Federal Research Center for Chemical Physics RAS, Kosygina Street 4, 119991  
Moscow, Russia

<sup>§</sup> Lomonosov Moscow State University, Leninskie gory 1, bld. 3, 119991 Moscow, Russia

<sup>†</sup> KAUST Catalysis Center (KCC), King Abdullah University of Science and Technology,  
Thuwal-23955-6900, Saudi Arabia

<sup>≠</sup> Joint Institute for High Temperatures, Russian Academy of Sciences, 13-2 Izhorskaya Street,  
Moscow 125412, Russia

## Table of contents

|                                                                                                                                                                                                                                                                  |    |
|------------------------------------------------------------------------------------------------------------------------------------------------------------------------------------------------------------------------------------------------------------------|----|
| Computational details .....                                                                                                                                                                                                                                      | 5  |
| Identification procedure of 20 most stable and geometrically diverse conformers from the molecular dynamic trajectory .....                                                                                                                                      | 5  |
| Internal SMD parameters for DME and GBL solvents .....                                                                                                                                                                                                           | 5  |
| DME .....                                                                                                                                                                                                                                                        | 5  |
| GBL.....                                                                                                                                                                                                                                                         | 6  |
| Tables .....                                                                                                                                                                                                                                                     | 7  |
| Table S1. Li <sup>+</sup> solvation free energies in kcal/mol from pure continuum solvation models with no explicit solvent molecules introduced.....                                                                                                            | 7  |
| Table S2. Monomer cycle Li <sup>+</sup> solvation free energies $\Delta G_{solv} * Li +$ in kcal/mol obtained with four continuum model strategies: SMD_OPT, SMD_SP, SMD_SP_PBE, CPCM_SP_PBE. ....                                                               | 8  |
| Table S3. Cluster cycle Li <sup>+</sup> solvation free energies $\Delta G_{solv} * Li +$ in kcal/mol obtained with four continuum model strategies: SMD_OPT, SMD_SP, SMD_SP_PBE, CPCM_SP_PBE. ....                                                               | 9  |
| Table S4. Individual contributions to monomer cycle predicted Li <sup>+</sup> solvation free energies. ...                                                                                                                                                       | 10 |
| Table S5. Individual contributions to cluster cycle predicted Li <sup>+</sup> solvation free energies. ....                                                                                                                                                      | 12 |
| Table S6. $\Delta G_{solv} * Sn$ obtained from continuum solvation models and their equation 3 counterparts in kcal/mol. ....                                                                                                                                    | 14 |
| Table S7. Experimental $\Delta G_{solv} * S$ in comparison with their counterparts from continuum solvation models in kcal/mol.....                                                                                                                              | 15 |
| Table S8. Equation 3 $\Delta G_{solv} * Sn$ calculated from the DLPNO-CCSD(T) $\Delta G_{bind} * (S)n$ and experimental $\Delta G_{solv} * S$ against their counterparts from continuum solvation models in kcal/mol.....                                        | 16 |
| Table S9. Experimental-based monomer/cluster (EB MC) $\Delta G_{solv,n} * Li +$ .....                                                                                                                                                                            | 17 |
| Table S10. MSE, MUE in kcal/mol and the Person correlation coefficient between Marcus experimental-based “bulk” scale $\Delta G_{solv,n} * Li +$ and their counterparts obtained from “monomer”, “cluster” and “experimental-based monomer/cluster” cycles. .... | 18 |
| References.....                                                                                                                                                                                                                                                  | 19 |
| Cartesian Coordinates (Å) and Absolute Energies (Hartree) of All Species Studied in Present Work.....                                                                                                                                                            | 20 |
| MeCN.....                                                                                                                                                                                                                                                        | 20 |
| (MeCN) <sub>4</sub> .....                                                                                                                                                                                                                                        | 20 |
| Li <sup>+</sup> (MeCN) <sub>4</sub> .....                                                                                                                                                                                                                        | 21 |
| Li <sup>+</sup> in MeCN .....                                                                                                                                                                                                                                    | 22 |
| (MeCN) <sub>5</sub> .....                                                                                                                                                                                                                                        | 23 |

|                                           |    |
|-------------------------------------------|----|
| Li <sup>+</sup> (MeCN) <sub>5</sub> ..... | 24 |
| DMA.....                                  | 25 |
| (DMA) <sub>4</sub> .....                  | 26 |
| Li <sup>+</sup> (DMA) <sub>4</sub> .....  | 28 |
| Li <sup>+</sup> in DMA.....               | 29 |
| (DMA) <sub>5</sub> .....                  | 30 |
| Li <sup>+</sup> (DMA) <sub>5</sub> .....  | 32 |
| DME.....                                  | 34 |
| (DME) <sub>3</sub> .....                  | 35 |
| Li <sup>+</sup> (DME) <sub>3</sub> .....  | 36 |
| Li <sup>+</sup> in DME.....               | 38 |
| (DME) <sub>4</sub> .....                  | 38 |
| Li <sup>+</sup> (DME) <sub>4</sub> .....  | 40 |
| DMF.....                                  | 42 |
| (DMF) <sub>4</sub> .....                  | 43 |
| Li <sup>+</sup> (DMF) <sub>4</sub> .....  | 44 |
| Li <sup>+</sup> in DMF.....               | 46 |
| (DMF) <sub>5</sub> .....                  | 46 |
| Li <sup>+</sup> (DMF) <sub>5</sub> .....  | 48 |
| (DMF) <sub>6</sub> .....                  | 50 |
| Li <sup>+</sup> (DMF) <sub>6</sub> .....  | 52 |
| DMSO.....                                 | 53 |
| (DMSO) <sub>3</sub> .....                 | 54 |
| Li <sup>+</sup> (DMSO) <sub>3</sub> ..... | 55 |
| Li <sup>+</sup> in DMSO.....              | 56 |
| (DMSO) <sub>4</sub> .....                 | 57 |
| Li <sup>+</sup> (DMSO) <sub>4</sub> ..... | 58 |
| (DMSO) <sub>5</sub> .....                 | 60 |
| Li <sup>+</sup> (DMSO) <sub>5</sub> ..... | 61 |
| GBL.....                                  | 63 |
| (GBL) <sub>4</sub> .....                  | 64 |
| Li <sup>+</sup> (GBL) <sub>4</sub> .....  | 65 |
| Li <sup>+</sup> in GBL.....               | 66 |

|                                                       |    |
|-------------------------------------------------------|----|
| (GBL) <sub>5</sub> .....                              | 67 |
| Li <sup>+</sup> (GBL) <sub>5</sub> .....              | 69 |
| (GBL) <sub>6</sub> .....                              | 70 |
| Li <sup>+</sup> (GBL) <sub>6</sub> .....              | 72 |
| H <sub>2</sub> O .....                                | 74 |
| (H <sub>2</sub> O) <sub>4</sub> .....                 | 75 |
| Li <sup>+</sup> (H <sub>2</sub> O) <sub>4</sub> ..... | 76 |
| Li <sup>+</sup> in water.....                         | 77 |
| (H <sub>2</sub> O) <sub>5</sub> .....                 | 77 |
| Li <sup>+</sup> (H <sub>2</sub> O) <sub>5</sub> ..... | 78 |
| MeOH .....                                            | 79 |
| (MeOH) <sub>3</sub> .....                             | 80 |
| Li <sup>+</sup> (MeOH) <sub>3</sub> .....             | 80 |
| Li <sup>+</sup> in methanol.....                      | 81 |
| (MeOH) <sub>4</sub> .....                             | 82 |
| Li <sup>+</sup> (MeOH) <sub>4</sub> .....             | 83 |
| Py.....                                               | 84 |
| (Py) <sub>3</sub> .....                               | 85 |
| Li <sup>+</sup> (Py) <sub>3</sub> .....               | 86 |
| Li <sup>+</sup> in pyridine.....                      | 87 |
| (Py) <sub>4</sub> .....                               | 88 |
| Li <sup>+</sup> (Py) <sub>4</sub> .....               | 89 |
| TMS.....                                              | 91 |
| (TMS) <sub>4</sub> .....                              | 91 |
| Li <sup>+</sup> (TMS) <sub>4</sub> .....              | 93 |
| Li <sup>+</sup> in TMS.....                           | 95 |

## Computational details

### Identification procedure of 20 most stable and geometrically diverse conformers from the molecular dynamic trajectory

First, we filled up the Python<sup>1</sup> list A with the 3000 most stable geometries from the MD trajectory and sorted it out based on respective energy values. Second, we consequently populated another list B of maximum length of 20 with the most structurally and energetically diverse geometries. Each new structure was allowed to join the list B if a) its QUATFIT<sup>2</sup> calculated RMSD structural deviation against all already found structure in list B was larger than certain threshold (0.5 Å); b) its PBE/ $\lambda$ 1 energy deviates by certain threshold (0.001 Hartree) from that of already found structures in list A. If at the end of procedure the number of structures was less than 20, the RMSD threshold was further relaxed and the procedure was repeated until the total number of structures was 20.

### Internal SMD parameters for DME and GBL solvents

#### DME

```
%cpcm
```

```
epsilon = 7.55
```

```
Refrac = 1.37702
```

```
smd true # turn on SMD
```

```
SMDsolvent "THF" # specify the name of solvent from the list
```

```
soln 1.37945 # index of refraction at optical frequencies at 293 K
```

```
soln25 1.37702 # index of refraction at optical frequencies at 298 K
```

```
sola 0.0 # Abraham's hydrogen bond acidity
```

solb 0.68 # Abraham's hydrogen bond basicity  
solg 35.4216652 # relative macroscopic surface tension  
solc 0.0 # aromaticity, fraction of non-hydrogenic solvent atoms  
# that are aromatic carbon atoms  
solh 0.0 # electronegative halogenicity, fraction of non-hydrogenic  
# solvent atoms that are F, Cl, or Br  
end

### **GBL**

epsilon = 41.7  
Refrac = 1.4358  
smd true # turn on SMD  
SMDsolvent "METHANOL" # specify the name of solvent from the list  
soln 1.4374 # index of refraction at optical frequencies at 293 K  
soln25 1.4358 # index of refraction at optical frequencies at 298 K  
sola 0.0 # Abraham's hydrogen bond acidity  
solb 0.59 # Abraham's hydrogen bond basicity  
solg 62.524 # relative macroscopic surface tension  
solc 0.0 # aromaticity, fraction of non-hydrogenic solvent atoms  
# that are aromatic carbon atoms  
solh 0.0 # electronegative halogenicity, fraction of non-hydrogenic  
# solvent atoms that are F, Cl, or Br  
end

## Tables

**Table S1. Li<sup>+</sup> solvation free energies in kcal/mol from pure continuum solvation models with no explicit solvent molecules introduced.**

|                           | <b>1</b> <sup>a</sup> | <b>2</b> <sup>a</sup> | <b>3</b> <sup>a</sup> | <b>Expt.</b> <sup>3</sup> |
|---------------------------|-----------------------|-----------------------|-----------------------|---------------------------|
| <b>MeCN</b>               | -88.7                 | -87.8                 | -115                  | -110.1                    |
| <b>DMA</b>                | -88.8                 | -87.8                 | -115.1                | -122.1                    |
| <b>DMF</b>                | -88.8                 | -87.7                 | -115.2                | -122.2                    |
| <b>DMSO</b>               | -89.3                 | -87.9                 | -115.7                | -121.0                    |
| <b>H<sub>2</sub>O</b>     | -90.0                 | -90.0                 | -116.8                | -116.9                    |
| <b>MeOH</b>               | -88.4                 | -87.7                 | -114.6                | -116.2                    |
| <b>TMS</b>                | -89.1                 | -87.2                 | -115.6                | -115.4                    |
| <b>MSE</b> <sup>b,c</sup> | 28.7                  | 29.7                  | 2.3                   |                           |
| <b>MUE</b> <sup>c,d</sup> | 28.7                  | 29.7                  | 3.7                   |                           |
| <b>ρ</b> <sup>c,e</sup>   | 0.10                  | -0.01                 | 0.08                  |                           |
| <b>DME</b>                | -79.1                 | -78.4                 | -102.6                |                           |
| <b>GBL</b>                | -89.0                 | -87.7                 | -115.4                |                           |
| <b>Py</b>                 | -84.2                 | -83.2                 | -108.8                |                           |

<sup>a</sup> Strategies: 1 SMD\_SP; 2 SMD\_SP\_PBE; 3 CPCM\_SP\_PBE; <sup>b</sup> Mean signed error in kcal/mol; <sup>c</sup> With respect to experimental values comprised in compilation of Marcus.;<sup>3</sup> <sup>d</sup> Mean unsigned error in kcal/mol; <sup>e</sup> Pearson correlation coefficient.

**Table S2. Monomer cycle Li<sup>+</sup> solvation free energies  $\Delta G_{solv}^*(Li^+)$  in kcal/mol obtained with four continuum model strategies: SMD\_OPT, SMD\_SP, SMD\_SP\_PBE, CPCM\_SP\_PBE.**

|                                   | SMD_OPT | SMD_SP | SMD_SP_PBE | CPCM_SP_PBE |
|-----------------------------------|---------|--------|------------|-------------|
| <b>MeCN<sub>4</sub></b>           | -112.0  | -112.0 | -115.2     | -110.6      |
| <b>MeCN<sub>5</sub></b>           | -103.1  | -102.1 | -105.5     | -101.0      |
| <b>DMA<sub>4</sub></b>            | -129.1  | -128.6 | -124.5     | -119.8      |
| <b>DMA<sub>5</sub></b>            | -122.3  | -124.8 | -120.4     | -115.0      |
| <b>DME<sub>3</sub></b>            | -127.1  | -127.7 | -126.1     | -123.4      |
| <b>DME<sub>4</sub></b>            | -123.8  | -122.7 | -120.2     | -118.1      |
| <b>DMF<sub>4</sub></b>            | -124.6  | -125.2 | -121.9     | -117.8      |
| <b>DMF<sub>5</sub></b>            | -122.7  | -120.5 | -116.6     | -112.9      |
| <b>DMF<sub>6</sub></b>            | -117.0  | -117.1 | -113.7     | -107.9      |
| <b>DMSO<sub>3</sub></b>           | -123.7  | -125.0 | -124.0     | -120.9      |
| <b>DMSO<sub>4</sub></b>           | -129.2  | -129.3 | -127.8     | -121.2      |
| <b>DMSO<sub>5</sub></b>           | -125.5  | -125.0 | -122.6     | -115.8      |
| <b>GBL<sub>4</sub></b>            | -123.4  | -121.3 | -118.1     | -115.2      |
| <b>GBL<sub>5</sub></b>            | -122.2  | -122.9 | -118.8     | -115.8      |
| <b>GBL<sub>6</sub></b>            | -118.2  | -119.7 | -114.7     | -111.8      |
| <b>H<sub>2</sub>O<sub>4</sub></b> | -119.4  | -118.2 | -115.8     | -117.0      |
| <b>H<sub>2</sub>O<sub>5</sub></b> | -112.4  | -114.4 | -112.3     | -114.1      |
| <b>MeOH<sub>3</sub></b>           | -111.7  | -111.8 | -114.3     | -115.5      |
| <b>MeOH<sub>4</sub></b>           | -114.2  | -113.8 | -117.4     | -115.6      |
| <b>Py<sub>3</sub></b>             | -112.4  | -112.4 | -114.2     | -113.5      |
| <b>Py<sub>4</sub></b>             | -117.5  | -117.5 | -120.4     | -117.0      |
| <b>TMS<sub>4</sub></b>            | -118.8  | -118.0 | -115.6     | -111.8      |



**Table S3. Cluster cycle Li<sup>+</sup> solvation free energies  $\Delta G_{solv}^*(Li^+)$  in kcal/mol obtained with four continuum model strategies: SMD\_OPT, SMD\_SP, SMD\_SP\_PBE, CPCM\_SP\_PBE.**

|                                   | SMD_OPT | SMD_SP | SMD_SP_PBE | CPCM_SP_PBE |
|-----------------------------------|---------|--------|------------|-------------|
| <b>MeCN<sub>4</sub></b>           | -130.0  | -130.6 | -132.9     | -128.7      |
| <b>MeCN<sub>5</sub></b>           | -127.7  | -129.2 | -131.8     | -127.3      |
| <b>DMA<sub>4</sub></b>            | -141.6  | -141.6 | -140.1     | -136.0      |
| <b>DMA<sub>5</sub></b>            | -140.6  | -142.1 | -141.1     | -136.3      |
| <b>DME<sub>3</sub></b>            | -137.9  | -138.2 | -138.3     | -134.8      |
| <b>DME<sub>4</sub></b>            | -140.0  | -139.4 | -139.0     | -136.3      |
| <b>DMF<sub>4</sub></b>            | -136.7  | -136.3 | -133.5     | -130.6      |
| <b>DMF<sub>5</sub></b>            | -140.0  | -137.4 | -135.1     | -133.0      |
| <b>DMF<sub>6</sub></b>            | -140.0  | -139.6 | -139.6     | -134.5      |
| <b>DMSO<sub>3</sub></b>           | -132.5  | -134.0 | -134.3     | -132.2      |
| <b>DMSO<sub>4</sub></b>           | -142.0  | -143.5 | -143.7     | -138.9      |
| <b>DMSO<sub>5</sub></b>           | -143.7  | -141.7 | -142.0     | -137.5      |
| <b>GBL<sub>4</sub></b>            | -131.7  | -129.0 | -128.4     | -124.7      |
| <b>GBL<sub>5</sub></b>            | -132.5  | -131.7 | -131.2     | -127.1      |
| <b>GBL<sub>6</sub></b>            | -131.8  | -131.9 | -130.8     | -126.8      |
| <b>H<sub>2</sub>O<sub>4</sub></b> | -128.8  | -128.4 | -126.4     | -125.9      |
| <b>H<sub>2</sub>O<sub>5</sub></b> | -126.2  | -130.5 | -128.4     | -128.1      |
| <b>MeOH<sub>3</sub></b>           | -120.5  | -121.2 | -123.1     | -123.0      |
| <b>MeOH<sub>4</sub></b>           | -124.0  | -124.4 | -126.9     | -123.0      |
| <b>Py<sub>3</sub></b>             | -123.6  | -123.5 | -125.4     | -124.0      |
| <b>Py<sub>4</sub></b>             | -132.2  | -133.1 | -135.9     | -131.6      |
| <b>TMS<sub>4</sub></b>            | -131.2  | -129.5 | -128.8     | -125.5      |

**Table S4. Individual contributions to monomer cycle predicted Li<sup>+</sup> solvation free energies.**

| <b>Complex</b>          | $\Delta E_{clust}(Li^+(S)_n)$ | $\Delta G_{clust}^*(Li^+(S)_n)$ | $\Delta G_{solv}^*(Li^+(S)_n)$ | $\Delta G_{solv}^*(S)$ | $nRT \ln[S]$ |
|-------------------------|-------------------------------|---------------------------------|--------------------------------|------------------------|--------------|
| <b>MeCN<sub>4</sub></b> | -123.0                        | -89.3                           | -45.1/-45.2/<br>45.5/-42.1     | -7.4/-7.4/<br>6.7/-7.0 | 7.0          |
| <b>MeCN<sub>5</sub></b> | -130.8                        | -85.5                           | -45.6/-44.8/<br>44.6/-41.6     | -7.4/-7.4/<br>6.7/-7.0 | 8.75         |
| <b>DMA<sub>4</sub></b>  | -148.9                        | -107.9                          | -40.8/-39.2/<br>39.8/-36.7     | -6.3/-6.0/<br>7.2/-7.6 | 5.63         |
| <b>DMA<sub>5</sub></b>  | -164.4                        | -108.5                          | -38.4/-39.5/<br>41.0/-37.4     | -6.3/-6.0/<br>7.2/-7.6 | 7.04         |
| <b>DME<sub>3</sub></b>  | -132.3                        | -96.1                           | -37.3/-37.6/<br>38.1/-35.0     | -3.5/-3.3/<br>4.1/-3.9 | 4.03         |
| <b>DME<sub>4</sub></b>  | -144.1                        | -95.6                           | -36.7/-35.2/<br>35.5/-32.9     | -3.5/-3.3/<br>4.1/-3.9 | 5.37         |
| <b>DMF<sub>4</sub></b>  | -143.1                        | -102.4                          | -41.7/-40.9/<br>39.5/-38.8     | -6.4/-6.1/<br>6.5/-7.4 | 6.07         |
| <b>DMF<sub>5</sub></b>  | -154.1                        | -103.3                          | -43.8/-39.9/<br>38.3/-38.9     | -6.4/-6.1/<br>6.5/-7.4 | 7.59         |
| <b>DMF<sub>6</sub></b>  | -170.1                        | -103.8                          | -42.5/-40.6/<br>39.9/-39.3     | -6.4/-6.1/<br>6.5/-7.4 | 9.11         |
| <b>DMSO<sub>3</sub></b> | -129.3                        | -99.1                           | -43.8/-44.9/<br>42.8/-45.8     | -8.0/-7.9/<br>7.5/-9.6 | 4.7          |
| <b>DMSO<sub>4</sub></b> | -154.2                        | -110.9                          | -44.0/-43.8/<br>40.8/-42.3     | -8.0/-7.9/<br>7.5/-9.6 | 6.27         |
| <b>DMSO<sub>5</sub></b> | -167.0                        | -112.1                          | -45.5/-44.7/<br>40.4/-43.7     | -8.0/-7.9/<br>7.5/-9.6 | 7.83         |
| <b>GBL<sub>4</sub></b>  | -135.3                        | -94.4                           | -46.1/-43.1/<br>45.7/-41.8     | -7.4/-7.1/<br>8.6/-8.3 | 12.38        |
| <b>GBL<sub>5</sub></b>  | -154.9                        | -100.7                          | -42.9/-42.4/<br>45.5/-41.2     | -7.4/-7.1/<br>8.6/-8.3 | 15.47        |

|                                   |        |        |                            |                          |       |
|-----------------------------------|--------|--------|----------------------------|--------------------------|-------|
| <b>GBL<sub>6</sub></b>            | -167.3 | -101.4 | -42.5/-42.6/<br>46.3/-41.7 | -7.4/-7.1/<br>8.6/-8.3   | 18.57 |
| <b>H<sub>2</sub>O<sub>4</sub></b> | -105.2 | -76.1  | -68.0/-67.0/<br>61.9/-60.9 | -8.5/-8.6/<br>7.9/-7.4   | 9.51  |
| <b>H<sub>2</sub>O<sub>5</sub></b> | -120.1 | -80.0  | -63.2/-65.5/<br>60.0/-59.0 | -8.5/-8.6/<br>7.9/-7.4   | 11.89 |
| <b>MeOH<sub>3</sub></b>           | -95.1  | -69.6  | -56.1/-55.8/<br>53.9/-55.1 | -6.6/-6.4/<br>5.0/-5.0   | 5.7   |
| <b>MeOH<sub>4</sub></b>           | -113.9 | -78.5  | -54.4/-53.4/<br>51.2/-49.3 | -6.6/-6.4/<br>5.0/-5.0   | 7.6   |
| <b>Py<sub>3</sub></b>             | -112.3 | -82.0  | -42.0/-41.9/<br>46.1/-40.4 | -5.3/-5.3/<br>6.1/-4.5   | 4.48  |
| <b>Py<sub>4</sub></b>             | -136.2 | -93.4  | -39.5/-39.5/<br>45.6/-35.5 | -5.3/-5.3/<br>6.1/-4.5   | 5.97  |
| <b>TMS<sub>4</sub></b>            | -148.4 | -104.2 | -47.5/-46.5/<br>46.9/-46.5 | -9.6/-9.5/<br>10.2/-11.1 | 5.57  |

**Table S5. Individual contributions to cluster cycle predicted Li<sup>+</sup> solvation free energies.**

| Complex                 | $\Delta E_{bind}(Li^+(S)_n)$ | $\Delta G_{bind}^*(Li^+(S)_n)$ | $\Delta G_{solv}^*(Li^+(S)_n)$ | $\Delta G_{solv}^*(S_n)$      | $RT\ln(\frac{[S]}{n})$ |
|-------------------------|------------------------------|--------------------------------|--------------------------------|-------------------------------|------------------------|
| <b>MeCN<sub>4</sub></b> | -100.6                       | -96.8                          | -45.1/-45.2/<br>45.5/-42.1     | -12.9/<br>12.4/<br>10.4/-11.2 | 0.93                   |
| <b>MeCN<sub>5</sub></b> | -102.5                       | -98.1                          | -45.6/-44.8/<br>44.6/-41.6     | -16.9/<br>14.5/<br>11.7/-13.2 | 0.79                   |
| <b>DMA<sub>4</sub></b>  | -116.7                       | -112.2                         | -40.8/-39.2/<br>39.8/-36.7     | -12.1/<br>10.4/<br>12.5/-13.5 | 0.59                   |
| <b>DMA<sub>5</sub></b>  | -121.5                       | -114.8                         | -38.4/-39.5/<br>41.0/-37.4     | -13.0/<br>12.6/<br>15.1/-16.3 | 0.45                   |
| <b>DME<sub>3</sub></b>  | -117.5                       | -105.8                         | -37.3/-37.6/<br>38.1/-35.0     | -5.9/-5.9/<br>6.3/-6.7        | 0.69                   |
| <b>DME<sub>4</sub></b>  | -123.3                       | -111.3                         | -36.7/-35.2/<br>35.5/-32.9     | -8.5/-7.6/<br>8.3/-8.5        | 0.52                   |
| <b>DMF<sub>4</sub></b>  | -113.0                       | -106.0                         | -41.7/-40.9/<br>39.5/-38.8     | -11.7/<br>11.3/<br>12.8/-15.0 | 0.70                   |
| <b>DMF<sub>5</sub></b>  | -113.7                       | -108.7                         | -43.8/-39.9/<br>38.3/-38.9     | -13.0/<br>11.7/<br>12.4/-15.2 | 0.56                   |
| <b>DMF<sub>6</sub></b>  | -117.6                       | -110.9                         | -42.5/-40.6/<br>39.9/-39.3     | -13.9/<br>12.3/<br>11.6/16.1  | 0.46                   |
| <b>DMSO<sub>3</sub></b> | -106.4                       | -99.1                          | -43.8/-44.9/<br>42.8/-45.8     | -11.4/<br>11.0/-8.5/<br>13.6  | 0.92                   |
| <b>DMSO<sub>4</sub></b> | -118.6                       | -110.8                         | -44.0/-43.8/<br>40.8/-42.3     | -13.6/<br>11.8/-8.6/<br>15.0  | 0.75                   |

|                                   |        |        |                            |                               |      |
|-----------------------------------|--------|--------|----------------------------|-------------------------------|------|
| <b>DMSO<sub>5</sub></b>           | -120.1 | -112.4 | -45.5/-44.7/<br>40.4/-43.7 | -14.8/<br>16.0/<br>11.5/-19.2 | 0.61 |
| <b>GBL<sub>4</sub></b>            | -102.3 | -95.6  | -46.1/-43.1/<br>45.7/-41.8 | -12.3/<br>11.9/<br>15.1/-14.9 | 2.27 |
| <b>GBL<sub>5</sub></b>            | -107.4 | -99.8  | -42.9/-42.4/<br>45.5/-41.2 | -12.3/<br>12.7/<br>16.3/-16.1 | 2.14 |
| <b>GBL<sub>6</sub></b>            | -110.6 | -103.0 | -42.5/-42.6/<br>46.3/-41.7 | -15.7/<br>15.7/<br>20.4/-20.0 | 2.03 |
| <b>H<sub>2</sub>O<sub>4</sub></b> | -78.4  | -76.2  | -68.0/-67.0/<br>61.9/-60.9 | -16.9/<br>16.4/<br>13.3/-12.7 | 1.57 |
| <b>H<sub>2</sub>O<sub>5</sub></b> | -85.7  | -82.9  | -63.2/-65.5/<br>60.0/-59.0 | -21.2/<br>19.3/<br>15.8/-15.2 | 1.42 |
| <b>MeOH<sub>3</sub></b>           | -77.7  | -71.8  | -56.1/-55.8/<br>53.9/-55.1 | -8.6/-7.7/<br>3.8/-5.1        | 1.25 |
| <b>MeOH<sub>4</sub></b>           | -83.4  | -78.1  | -54.4/-53.4/<br>51.2/-49.3 | -9.5/-8.2/<br>3.5/-5.5        | 1.08 |
| <b>Py<sub>3</sub></b>             | -99.6  | -91.4  | -42.0/-41.9/<br>46.1/-40.4 | -10.6/<br>10.6/<br>13.0/-8.7  | 0.84 |
| <b>Py<sub>4</sub></b>             | -115.4 | -105.9 | -39.5/-39.5/<br>45.6/-35.5 | -13.9/<br>13.0/<br>16.3/-10.5 | 0.67 |
| <b>TMS<sub>4</sub></b>            | -107.6 | -99.6  | -47.5/-46.5/<br>46.9/-46.5 | -16.5/<br>17.2/<br>18.2/-21.2 | 0.57 |

**Table S6.**  $\Delta G_{solv}^*(S_n)$  obtained from continuum solvation models and their equation 3 counterparts in kcal/mol.

| Complex                       | SMD_OPT     |       | SMD_SP      |       | SMD_SP_PBE  |       | CPCM_SP_PBE |       |
|-------------------------------|-------------|-------|-------------|-------|-------------|-------|-------------|-------|
|                               | Continuum   | Eq. 3 |
| MeCN <sub>4</sub>             | -12.9       | -31.2 | -12.4       | -31.3 | -10.4       | -28.5 | -11.2       | -29.7 |
| MeCN <sub>5</sub>             | -16.9       | -41.5 | -14.5       | -41.6 | -11.7       | -38.0 | -13.2       | -39.6 |
| DMA <sub>4</sub>              | -12.1       | -24.6 | -10.4       | -23.5 | -12.5       | -28.2 | -13.5       | -29.7 |
| DMA <sub>5</sub>              | -13.0       | -31.2 | -12.6       | -29.9 | -15.1       | -35.8 | -16.3       | -37.7 |
| DME <sub>3</sub>              | -5.9        | -16.7 | -5.9        | -16.4 | -6.3        | -18.5 | -6.7        | -18.2 |
| DME <sub>4</sub>              | -8.5        | -24.7 | -7.6        | -24.2 | -8.3        | -27.1 | -8.5        | -26.6 |
| DMF <sub>4</sub>              | -11.7       | -23.8 | -11.3       | -22.5 | -12.8       | -24.3 | -15.0       | -27.8 |
| DMF <sub>5</sub>              | -13.0       | -30.3 | -11.7       | -28.6 | -12.4       | -30.9 | -15.2       | -35.2 |
| DMF <sub>6</sub>              | -13.9       | -36.9 | -12.3       | -34.8 | -11.6       | -37.6 | -16.1       | -42.7 |
| DMSO <sub>3</sub>             | -11.4       | -20.2 | -11.0       | -20.0 | -8.5        | -18.8 | -13.6       | -24.9 |
| DMSO <sub>4</sub>             | -13.6       | -26.3 | -11.8       | -26.0 | -8.6        | -24.5 | -15.0       | -32.6 |
| DMSO <sub>5</sub>             | -14.8       | -33.0 | -16.0       | -32.7 | -11.5       | -30.8 | -19.2       | -40.9 |
| GBL <sub>4</sub>              | -12.3       | -20.6 | -11.9       | -19.6 | -15.1       | -25.4 | -14.9       | -24.4 |
| GBL <sub>5</sub>              | -12.3       | -22.6 | -12.7       | -21.4 | -16.3       | -28.7 | -16.1       | -27.3 |
| GBL <sub>6</sub>              | -15.7       | -29.3 | -15.7       | -27.8 | -20.4       | -36.5 | -20.0       | -34.9 |
| H <sub>2</sub> O <sub>4</sub> | -16.9       | -26.3 | -16.4       | -26.6 | -13.3       | -23.9 | -12.7       | -21.6 |
| H <sub>2</sub> O <sub>5</sub> | -21.2       | -35.0 | -19.3       | -35.4 | -15.8       | -32.0 | -15.2       | -29.2 |
| MeOH <sub>3</sub>             | -8.6        | -17.4 | -7.7        | -17.0 | -3.8        | -12.6 | -5.1        | -12.6 |
| MeOH <sub>4</sub>             | -9.5        | -19.4 | -8.2        | -18.9 | -3.5        | -13.0 | -5.5        | -12.9 |
| Py <sub>3</sub>               | -10.6       | -21.8 | -10.6       | -21.8 | -13.0       | -24.2 | -8.7        | -19.2 |
| Py <sub>4</sub>               | -13.9       | -28.6 | -13.0       | -28.6 | -16.3       | -31.8 | -10.5       | -25.1 |
| TMS <sub>4</sub>              | -16.5       | -28.9 | -17.2       | -28.6 | -18.2       | -31.4 | -21.2       | -34.9 |
| <b>MAD</b>                    | <b>13.9</b> |       | <b>14.0</b> |       | <b>15.3</b> |       | <b>15.2</b> |       |
| <b>MSD</b>                    | <b>13.9</b> |       | <b>14.0</b> |       | <b>15.3</b> |       | <b>15.2</b> |       |

**Table S7. Experimental  $\Delta G_{solv}^*(S)$  in comparison with their counterparts from continuum solvation models in kcal/mol.**

| <b>Solvent</b>        | <b>Expt.</b>                        | <b>SMD_OPT</b> | <b>SMD_SP</b> | <b>SMD_SP_PBE</b> | <b>CPCM_SP_PCM</b> |
|-----------------------|-------------------------------------|----------------|---------------|-------------------|--------------------|
| <b>H<sub>2</sub>O</b> | -6.3<br>(3146 Pa) <sup>a4</sup>     | -8.5           | -8.6          | -7.9              | -7.4               |
| <b>MeCN</b>           | -4.9<br>(11825 Pa) <sup>a5</sup>    | -7.4           | -7.4          | -6.7              | -7.0               |
| <b>DMA</b>            | -6.8<br>(266.7 Pa) <sup>a6</sup>    | -6.3           | -6.0          | -7.2              | -7.6               |
| <b>DME</b>            | -4.9<br>(6399.5 Pa) <sup>a7</sup>   | -3.5           | -3.3          | -4.1              | -3.9               |
| <b>DMF</b>            | -6.6<br>(500.0 Pa) <sup>a8</sup>    | -6.4           | -6.1          | -6.5              | -7.4               |
| <b>DMSO</b>           | -7.7<br>(82.0 Pa) <sup>a9</sup>     | -8.0           | -7.9          | -7.5              | -9.6               |
| <b>GBL</b>            | -9.4<br>(60.0 Pa) <sup>a10</sup>    | -7.4           | -7.1          | -8.6              | -8.3               |
| <b>MeOH</b>           | -4.9<br>(16931.9 Pa) <sup>a11</sup> | -6.6           | -6.4          | -5.0              | -5.0               |
| <b>Py</b>             | -5.5<br>(2773.1 Pa) <sup>a6</sup>   | -5.3           | -5.3          | -6.1              | -4.5               |
| <b>TMS</b>            | -10.2<br>(0.8 Pa) <sup>a6</sup>     | -9.6           | -9.5          | -10.2             | -11.1              |
| <b>MUE</b>            |                                     | 1.2            | 1.2           | 0.6               | 1.1                |
| <b>MSE</b>            |                                     | -0.2           | -0.1          | -0.3              | -0.4               |

<sup>a</sup> See equation (3) in main paper for relation between  $\Delta G_{solv}^*(S)$  and pressure.

**Table S8. Equation 3  $\Delta G_{sol}^*(S_n)$  calculated from the DLPNO-CCSD(T)  $\Delta G_{bind}^*((S)_n)$  and experimental  $\Delta G_{sol}^*(S)$  against their counterparts from continuum solvation models in kcal/mol.**

|                               | Eq. 3 | SMD_OPT | SMD_SP | SMD_SP_PBE | CPCM_SP_PBE |
|-------------------------------|-------|---------|--------|------------|-------------|
| MeCN <sub>4</sub>             | -21.4 | -12.9   | -12.4  | -10.4      | -11.2       |
| MeCN <sub>5</sub>             | -29.3 | -16.9   | -14.5  | -11.7      | -13.2       |
| DMA <sub>4</sub>              | -26.6 | -12.1   | -10.4  | -12.5      | -13.5       |
| DMA <sub>5</sub>              | -33.8 | -13.0   | -12.6  | -15.1      | -16.3       |
| DME <sub>3</sub>              | -21.0 | -5.9    | -5.9   | -6.3       | -6.7        |
| DME <sub>4</sub>              | -30.3 | -8.5    | -7.6   | -8.3       | -8.5        |
| DMF <sub>4</sub>              | -24.5 | -11.7   | -11.3  | -12.8      | -15.0       |
| DMF <sub>5</sub>              | -31.1 | -13.0   | -11.7  | -12.4      | -15.2       |
| DMF <sub>6</sub>              | -37.8 | -13.9   | -12.3  | -11.6      | -16.1       |
| DMSO <sub>3</sub>             | -19.3 | -11.4   | -11.0  | -8.5       | -13.6       |
| DMSO <sub>4</sub>             | -25.1 | -13.6   | -11.8  | -8.6       | -15.0       |
| DMSO <sub>5</sub>             | -31.5 | -14.8   | -16.0  | -11.5      | -19.2       |
| GBL <sub>4</sub>              | -28.7 | -12.3   | -11.9  | -15.1      | -14.9       |
| GBL <sub>5</sub>              | -32.7 | -12.3   | -12.7  | -16.3      | -16.1       |
| GBL <sub>6</sub>              | -41.4 | -15.7   | -15.7  | -20.4      | -20.0       |
| H <sub>2</sub> O <sub>4</sub> | -17.5 | -16.9   | -16.4  | -13.3      | -12.7       |
| H <sub>2</sub> O <sub>5</sub> | -24.0 | -21.2   | -19.3  | -15.8      | -15.2       |
| MeOH <sub>3</sub>             | -12.3 | -8.6    | -7.7   | -3.8       | -5.1        |
| MeOH <sub>4</sub>             | -12.5 | -9.5    | -8.2   | -3.5       | -5.5        |
| Py <sub>3</sub>               | -22.3 | -10.6   | -10.6  | -13.0      | -8.7        |
| Py <sub>4</sub>               | -29.3 | -13.9   | -13.0  | -16.3      | -10.5       |
| TMS <sub>4</sub>              | -31.4 | -16.5   | -17.2  | -18.2      | -21.2       |
| MUE                           |       | 13.6    | 14.3   | 14.5       | 13.2        |
| MSE                           |       | 13.6    | 14.3   | 14.5       | 13.2        |



**Table S9. Experimental-based monomer/cluster (EB MC)  $\Delta G_{solv,n}^*(Li^+)$ .**

|                                   | <b>SMD_opt</b> | <b>SMD_SP</b> | <b>SMD_SP_PBE</b> | <b>CPCM_SP_PBE</b> |
|-----------------------------------|----------------|---------------|-------------------|--------------------|
| <b>MeCN<sub>4</sub></b>           | -121.8         | -121.9        | -122.2            | -118.9             |
| <b>MeCN<sub>5</sub></b>           | -115.4         | -114.5        | -114.3            | -111.3             |
| <b>DMA<sub>4</sub></b>            | -127.0         | -125.4        | -126.0            | -122.9             |
| <b>DMA<sub>5</sub></b>            | -119.8         | -120.9        | -122.4            | -118.8             |
| <b>DME<sub>3</sub></b>            | -122.8         | -123.1        | -123.6            | -120.5             |
| <b>DME<sub>4</sub></b>            | -118.2         | -116.6        | -116.9            | -114.4             |
| <b>DMF<sub>4</sub></b>            | -124.0         | -123.2        | -121.8            | -121.1             |
| <b>DMF<sub>5</sub></b>            | -122.0         | -118.0        | -116.5            | -117.1             |
| <b>DMF<sub>6</sub></b>            | -116.1         | -114.2        | -113.5            | -112.9             |
| <b>DMSO<sub>3</sub></b>           | -124.6         | -125.7        | -123.6            | -126.6             |
| <b>DMSO<sub>4</sub></b>           | -130.4         | -130.3        | -127.2            | -128.8             |
| <b>DMSO<sub>5</sub></b>           | -127.0         | -126.2        | -121.9            | -125.2             |
| <b>GBL<sub>4</sub></b>            | -115.3         | -112.3        | -114.8            | -110.9             |
| <b>GBL<sub>5</sub></b>            | -112.1         | -111.6        | -114.8            | -110.4             |
| <b>GBL<sub>6</sub></b>            | -106.0         | -106.2        | -109.9            | -105.3             |
| <b>H<sub>2</sub>O<sub>4</sub></b> | -128.2         | -127.3        | -122.2            | -121.2             |
| <b>H<sub>2</sub>O<sub>5</sub></b> | -123.4         | -125.8        | -120.2            | -119.3             |
| <b>MeOH<sub>3</sub></b>           | -116.8         | -116.5        | -114.7            | -115.8             |
| <b>MeOH<sub>4</sub></b>           | -121.0         | -120.1        | -117.8            | -116.0             |
| <b>Py<sub>3</sub></b>             | -111.9         | -111.8        | -116.0            | -110.3             |
| <b>Py<sub>4</sub></b>             | -116.7         | -116.8        | -122.8            | -112.8             |
| <b>TMS<sub>4</sub></b>            | -116.3         | -115.3        | -115.7            | -115.3             |

**Table S10. MSE, MUE in kcal/mol and the Person correlation coefficient between Marcus experimental-based “bulk” scale  $\Delta G_{solv,n}^*(Li^+)$  and their counterparts obtained from “monomer”, “cluster” and “experimental-based monomer/cluster” cycles.**

| Cycle                                                                                                                                                            | SMD_OPT | SMD_SP | SMD_SP_PBE | CPCM_SP_PBE |
|------------------------------------------------------------------------------------------------------------------------------------------------------------------|---------|--------|------------|-------------|
| <b>Monomer</b>                                                                                                                                                   |         |        |            |             |
| MSE                                                                                                                                                              | -3.4    | -3.0   | -2.0       | 1.4         |
| MUE                                                                                                                                                              | 3.9     | 3.7    | 2.4        | 1.7         |
| $\rho$                                                                                                                                                           | 0.91    | 0.91   | 0.82       | 0.89        |
| <b>Cluster (n=4)</b>                                                                                                                                             |         |        |            |             |
| MSE                                                                                                                                                              | -15.8   | -15.8  | -15.5      | -12.1       |
| MUE                                                                                                                                                              | 15.8    | 15.8   | 15.5       | 12.1        |
| $\rho$                                                                                                                                                           | 0.71    | 0.69   | 0.53       | 0.60        |
| <b>Cluster <sup>a</sup></b>                                                                                                                                      |         |        |            |             |
| MSE                                                                                                                                                              | -16.5   | -16.6  | -16.8      | -13.3       |
| MUE                                                                                                                                                              | 16.5    | 16.6   | 16.8       | 13.3        |
| $\rho$                                                                                                                                                           | 0.75    | 0.75   | 0.68       | 0.72        |
| <b>EB M/C</b>                                                                                                                                                    |         |        |            |             |
| MSE                                                                                                                                                              | -6.4    | -5.6   | -4.2       | -2.9        |
| MUE                                                                                                                                                              | 6.4     | 5.7    | 4.3        | 3.3         |
| $\rho$                                                                                                                                                           | 0.55    | 0.48   | 0.49       | 0.59        |
| <sup>a</sup> Number of explicitly coordinated solvent molecules n correspond to lowest Li+ solvation Gibbs free energy obtained (in some cases n larger than 4). |         |        |            |             |

## References

- (1) Van Rossum, G.; Drake, F. L. *Python Language Reference Manual*; A Python manual; Network Theory Limited, 2003.
- (2) Heisterberg, D. J. The Quatfit Program, the CCL Archive. 1990.
- (3) Ion Solvation in Neat Solvents. In *Ions in Solution and their Solvation*; John Wiley & Sons, Ltd, 2015; pp 107–155. <https://doi.org/https://doi.org/10.1002/9781118892336.ch4>.
- (4) Water Vapor Pressure: Datasheet from "Dortmund Data Bank (DDB) -- Thermophysical Properties Edition 2014" in SpringerMaterials ([https://Materials.Springer.Com/Thermophysical/Docs/Vap\\_c174](https://Materials.Springer.Com/Thermophysical/Docs/Vap_c174)). Springer-Verlag Berlin Heidelberg & DDBST GmbH, Oldenburg, Germany.
- (5) Acetonitrile Vapor Pressure: Datasheet from "Dortmund Data Bank (DDB) -- Thermophysical Properties Edition 2014" in SpringerMaterials ([https://Materials.Springer.Com/Thermophysical/Docs/Vap\\_c3](https://Materials.Springer.Com/Thermophysical/Docs/Vap_c3)). Springer-Verlag Berlin Heidelberg & DDBST GmbH, Oldenburg, Germany.
- (6) DAUBERT, T. E. Physical and Thermodynamic Properties of Pure Chemicals : Data Compilation. *Des. Inst. Physacal Prop. Data(DIPPR)* **1989**.
- (7) Riddick, J. A.; Bunger, W. B.; Sakano, T. K. *Organic Solvents: Physical Properties and Methods of Purification*. Fourth Edition.
- (8) N,N-Dimethylformamide (DMF) Vapor Pressure: Datasheet from "Dortmund Data Bank (DDB) -- Thermophysical Properties Edition 2014" in SpringerMaterials ([https://Materials.Springer.Com/Thermophysical/Docs/Vap\\_c72](https://Materials.Springer.Com/Thermophysical/Docs/Vap_c72)). Springer-Verlag Berlin Heidelberg & DDBST GmbH, Oldenburg, Germany.
- (9) Dimethyl Sulfoxide Vapor Pressure: Datasheet from "Dortmund Data Bank (DDB) -- Thermophysical Properties Edition 2014" in SpringerMaterials ([https://Materials.Springer.Com/Thermophysical/Docs/Vap\\_c151](https://Materials.Springer.Com/Thermophysical/Docs/Vap_c151)). Springer-Verlag Berlin Heidelberg & DDBST GmbH, Oldenburg, Germany.
- (10) Carl L. Yaws, P. D. *Chemical Properties Handbook*; McGraw-Hill Education: New York, 1999.
- (11) Boublik, T.; Fried, V.; Hala, E. *The Vapour Pressures of Pure Substances*.

## Cartesian Coordinates (Å) and Absolute Energies (Hartree) of All Species Studied in Present Work

### MeCN

|                                           |                                |
|-------------------------------------------|--------------------------------|
| E (PBE-D3/ma-def2-svp GAS_OPT) =          | -132.4932441391                |
| E (PBE-D3/ma-def2-svp SMD_OPT) =          | -132.5039012660                |
| $\Delta G_{\text{corr}}$ (ID-RR-HR GAS) = | <b>0.0186445809</b>            |
| E (DLPNO-CCSDT/cc-p(wC)VTZ GAS_OPT GAS) = | -132.5363959498                |
| E (DLPNO-CCSDT/cc-p(wC)VTZ GAS_OPT SMD) = | -132.5481456865                |
| E (DLPNO-CCSDT/cc-p(wC)VTZ SMD_OPT SMD) = | -132.5481131465                |
| E (PBE-D3/ma-def2-tzvp GAS_OPT GAS) =     | -132.6381795565                |
| E (PBE-D3/ma-def2-tzvp GAS_OPT SMD) =     | -132.6487938268                |
| E (PBE-D3/ma-def2-tzvp GAS_OPT CPCM) =    | -132.6492806100                |
| GAS_OPT                                   | SMD_OPT                        |
| C 2.985925 -0.526925 -3.017894            | C 2.993737 -0.529528 -3.016186 |
| N 1.918333 -0.132856 -3.293685            | N 1.924608 -0.135657 -3.291820 |
| C 4.314793 -1.017305 -2.674641            | C 4.315955 -1.017472 -2.674409 |
| H 4.719016 -1.644385 -3.493927            | H 4.713912 -1.643769 -3.497436 |
| H 4.274599 -1.628211 -1.751041            | H 4.268201 -1.627355 -1.750450 |
| H 5.008029 -0.169500 -2.505806            | H 5.004284 -0.165400 -2.506694 |

### (MeCN)<sub>4</sub>

|                                           |                     |
|-------------------------------------------|---------------------|
| E (PBE-D3/ma-def2-svp GAS_OPT) =          | -530.0099892320     |
| E (PBE-D3/ma-def2-svp SMD_OPT) =          | -530.0275452086     |
| $\Delta G_{\text{corr}}$ (ID-RR-HR GAS) = | <b>0.1313758392</b> |

|                                           |                                |
|-------------------------------------------|--------------------------------|
| E (DLPNO-CCSDT/cc-p(wC)VTZ GAS_OPT GAS) = | -530.1813785753                |
| E (DLPNO-CCSDT/cc-p(wC)VTZ GAS_OPT SMD) = | -530.2011244816                |
| E (DLPNO-CCSDT/cc-p(wC)VTZ SMD_OPT SMD) = | -530.2018602264                |
| E (PBE-D3/ma-def2-tzvp GAS_OPT GAS) =     | -530.5883226935                |
| E (PBE-D3/ma-def2-tzvp GAS_OPT SMD) =     | -530.6048281048                |
| E (PBE-D3/ma-def2-tzvp GAS_OPT CPCM) =    | -530.6060947060                |
| GAS_OPT                                   | SMD_OPT                        |
| C 1.427630 -0.656319 2.342283             | C 0.565472 -0.988133 2.811184  |
| N 2.228319 -0.917514 3.157454             | N 1.488095 -0.411176 3.247337  |
| C 0.428588 -0.318906 1.341367             | C -0.570661 -1.708139 2.269695 |
| H 0.673795 0.668352 0.900043              | H -0.265989 -2.743633 2.016055 |
| H -0.567564 -0.247688 1.823713            | H -0.933119 -1.208190 1.349885 |
| H 0.404056 -1.087095 0.543862             | H -1.389776 -1.743285 3.015036 |
| C -1.320739 2.135309 3.652148             | C 1.348049 -1.793397 -1.126376 |
| N -1.679124 1.019258 3.653208             | N 0.507921 -0.999263 -0.931676 |
| C -0.857673 3.513313 3.644981             | C 2.391404 -2.771552 -1.365350 |
| H -1.711743 4.209671 3.534159             | H 2.459476 -2.997057 -2.448038 |
| H -0.145821 3.655094 2.805908             | H 2.169689 -3.706420 -0.813702 |
| H -0.322570 3.724625 4.592569             | H 3.364983 -2.369759 -1.019553 |
| C 2.718124 2.487243 2.634089              | C 3.302904 0.641499 0.469350   |
| N 1.903164 2.755912 1.835696              | N 4.141668 -0.169876 0.356010  |
| C 3.717441 2.147867 3.633803              | C 2.262239 1.641636 0.602953   |
| H 3.844191 1.046705 3.664099              | H 2.102762 1.881237 1.672495   |
| H 3.368127 2.486184 4.630386              | H 1.316295 1.251376 0.176644   |
| H 4.685868 2.628049 3.392263              | H 2.550190 2.564711 0.061696   |
| C 0.911519 1.045111 5.990089              | C 2.892764 -3.501417 2.285975  |
| N 1.282651 2.156773 5.975137              | N 1.970236 -4.119438 1.909253  |
| C 0.451779 -0.334270 5.993122             | C 4.035474 -2.731232 2.735489  |
| H -0.519960 -0.394869 5.462143            | H 4.932560 -3.379815 2.788260  |
| H 0.331231 -0.700220 7.031510             | H 3.837407 -2.306098 3.738991  |
| H 1.185092 -0.967998 5.454508             | H 4.228638 -1.899453 2.026732  |

### Li<sup>+</sup>(MeCN)<sub>4</sub>

|                                           |                     |
|-------------------------------------------|---------------------|
| E (PBE-D3/ma-def2-svp GAS_OPT) =          | -537.4258365340     |
| E (PBE-D3/ma-def2-svp SMD_OPT) =          | -537.4979479113     |
| $\Delta G_{\text{corr}}$ (ID-RR-HR GAS) = | <b>0.1276162193</b> |

|                                           |                                 |
|-------------------------------------------|---------------------------------|
| E (DLPNO-CCSDT/cc-p(wC)VTZ GAS_OPT GAS) = | -537.6152972849                 |
| E (DLPNO-CCSDT/cc-p(wC)VTZ GAS_OPT SMD) = | -537.6872989455                 |
| E (DLPNO-CCSDT/cc-p(wC)VTZ SMD_OPT SMD) = | -537.6871119807                 |
| E (PBE-D3/ma-def2-tzvp GAS_OPT GAS) =     | -538.0074629541                 |
| E (PBE-D3/ma-def2-tzvp GAS_OPT SMD) =     | -538.0799573534                 |
| E (PBE-D3/ma-def2-tzvp GAS_OPT CPCM) =    | -538.0745953591                 |
| <b>GAS_OPT</b>                            | <b>SMD_OPT</b>                  |
| C -1.360835 2.001590 2.102683             | C -1.380632 1.997945 2.071490   |
| N -0.864527 1.272297 1.336659             | N -0.845402 1.287772 1.311637   |
| C -1.977753 2.908101 3.055098             | C -2.045412 2.874082 3.010450   |
| H -1.239417 3.657950 3.402020             | H -1.351492 3.144349 3.831003   |
| H -2.351925 2.343795 3.932208             | H -2.930569 2.362592 3.437795   |
| H -2.828565 3.437649 2.582376             | H -2.374353 3.797972 2.494687   |
| Li 0.001180 0.000635 -0.000335            | Li 0.034394 0.031967 -0.007795  |
| C 1.721392 1.684036 -2.119004             | C 1.748990 1.675868 -2.139826   |
| N 1.094665 1.070924 -1.346807             | N 1.114675 1.081416 -1.357230   |
| C 2.500537 2.446229 -3.078916             | C 2.533242 2.406508 -3.110599   |
| H 2.811330 1.796144 -3.920681             | H 2.777471 1.746925 -3.966874   |
| H 3.407113 2.858714 -2.593376             | H 3.474687 2.759933 -2.645146   |
| H 1.897808 3.285089 -3.479918             | H 1.959726 3.280654 -3.477666   |
| C -2.279652 -1.643290 -1.542438           | C -2.265709 -1.621768 -1.482644 |
| N -1.448326 -1.044250 -0.981160           | N -1.413966 -1.016355 -0.957080 |
| C -3.313011 -2.387942 -2.240352           | C -3.320990 -2.370644 -2.128342 |
| H -3.859745 -1.721562 -2.936624           | H -4.122662 -1.681251 -2.459998 |
| H -4.033725 -2.813368 -1.514158           | H -3.747435 -3.106548 -1.417980 |
| H -2.860762 -3.216339 -2.820874           | H -2.917803 -2.908846 -3.009020 |
| C 1.920776 -2.041684 1.557534             | C 1.944395 -2.006215 1.539378   |
| N 1.222347 -1.297521 0.988848             | N 1.250129 -1.253115 0.974535   |
| C 2.789138 -2.966798 2.264323             | C 2.802220 -2.938627 2.236406   |
| H 3.371396 -2.428544 3.038291             | H 3.252381 -2.447402 3.121812   |
| H 3.494305 -3.445451 1.556226             | H 3.611774 -3.281502 1.561881   |
| H 2.186749 -3.756194 2.756002             | H 2.212340 -3.815708 2.569125   |

## Li<sup>+</sup> in MeCN

|                                  |               |
|----------------------------------|---------------|
| E (PBE-D3/ma-def2-svp GAS_OPT) = | -7.2519251623 |
| E (PBE-D3/ma-def2-svp SMD_OPT) = | -7.3917970144 |

|                                           |                |
|-------------------------------------------|----------------|
| $\Delta G_{\text{corr}}$ (ID-RR-HR GAS) = | -0.0127326619  |
| E (DLPNO-CCSDT/cc-p(wC)VTZ GAS_OPT GAS) = | -7.2736440090  |
| E (DLPNO-CCSDT/cc-p(wC)VTZ GAS_OPT SMD) = | -7.4149214430  |
| E (DLPNO-CCSDT/cc-p(wC)VTZ SMD_OPT SMD) = | -7.4149214430  |
| E (PBE-D3/ma-def2-tzvp GAS_OPT GAS) =     | -7.2566456293  |
| E (PBE-D3/ma-def2-tzvp GAS_OPT SMD) =     | -7.3964999510  |
| E (PBE-D3/ma-def2-tzvp GAS_OPT CPCM) =    | -7.4399355109  |
| GAS_OPT                                   | SMD_OPT        |
| Li 0.0 0.0 0.0                            | Li 0.0 0.0 0.0 |

### (MeCN)<sub>5</sub>

|                                           |                              |
|-------------------------------------------|------------------------------|
| E (PBE-D3/ma-def2-svp GAS_OPT) =          | -662.5145186803              |
| E (PBE-D3/ma-def2-svp SMD_OPT) =          | -662.5362702156              |
| $\Delta G_{\text{corr}}$ (ID-RR-HR GAS) = | <b>0.1705267200</b>          |
| E (DLPNO-CCSDT/cc-p(wC)VTZ GAS_OPT GAS) = | -662.7270254144              |
| E (DLPNO-CCSDT/cc-p(wC)VTZ GAS_OPT SMD) = | -662.7501386194              |
| E (DLPNO-CCSDT/cc-p(wC)VTZ SMD_OPT SMD) = | -662.7539816331              |
| E (PBE-D3/ma-def2-tzvp GAS_OPT GAS) =     | -663.2369149863              |
| E (PBE-D3/ma-def2-tzvp GAS_OPT SMD) =     | -663.2556383866              |
| E (PBE-D3/ma-def2-tzvp GAS_OPT CPCM) =    | -663.2579799476              |
| GAS_OPT                                   | SMD_OPT                      |
| C 0.132099 1.090059 3.278800              | C 0.509758 1.486293 2.169892 |

|   |           |           |           |   |           |           |           |
|---|-----------|-----------|-----------|---|-----------|-----------|-----------|
| N | -0.532563 | 1.532575  | 2.421221  | N | 1.658679  | 1.372027  | 2.373203  |
| C | 0.966720  | 0.525205  | 4.325006  | C | -0.911851 | 1.606581  | 1.911952  |
| H | 0.337139  | 0.132479  | 5.147661  | H | -1.273510 | 0.686918  | 1.407969  |
| H | 1.646176  | 1.299202  | 4.733201  | H | -1.107992 | 2.480669  | 1.260578  |
| H | 1.570020  | -0.305372 | 3.894941  | H | -1.462068 | 1.736538  | 2.865125  |
| C | -1.218846 | 0.159729  | -3.221230 | C | -3.123727 | 0.198304  | -2.372640 |
| N | -1.891032 | 1.058147  | -2.882999 | N | -3.135432 | -0.646478 | -3.185620 |
| C | -0.377115 | -0.956670 | -3.621133 | C | -3.087367 | 1.242784  | -1.367696 |
| H | -0.627104 | -1.839899 | -2.999354 | H | -3.777885 | 2.063075  | -1.647731 |
| H | 0.685051  | -0.691902 | -3.445788 | H | -2.056466 | 1.646766  | -1.289824 |
| H | -0.530480 | -1.197734 | -4.691046 | H | -3.396775 | 0.834595  | -0.385353 |
| C | 1.082007  | 1.647421  | -1.224207 | C | 1.398118  | 1.628883  | -1.144177 |
| N | 1.780258  | 0.800503  | -1.634970 | N | 0.300407  | 2.003393  | -1.315399 |
| C | 0.202130  | 2.687885  | -0.718075 | C | 2.748222  | 1.146509  | -0.932208 |
| H | -0.051378 | 2.483839  | 0.343649  | H | 3.310087  | 1.159457  | -1.887477 |
| H | -0.730833 | 2.696981  | -1.317674 | H | 2.721393  | 0.107753  | -0.542189 |
| H | 0.694180  | 3.677495  | -0.792623 | H | 3.270884  | 1.788759  | -0.196385 |
| C | -2.030886 | -1.091379 | -0.178231 | C | -0.691578 | -1.531979 | -0.761878 |
| N | -1.435852 | -2.027091 | -0.557698 | N | -1.288189 | -1.399532 | 0.238534  |
| C | -2.760404 | 0.079376  | 0.279646  | C | 0.047663  | -1.694383 | -1.998471 |
| H | -2.139812 | 0.653502  | 0.999984  | H | 0.101459  | -0.730993 | -2.542555 |
| H | -3.703394 | -0.223662 | 0.775647  | H | -0.453404 | -2.441182 | -2.645573 |
| H | -2.994130 | 0.724991  | -0.591116 | H | 1.075734  | -2.043920 | -1.775799 |
| C | 2.124962  | -1.950958 | 1.209650  | C | 1.947873  | -2.075884 | 1.482661  |
| N | 2.281784  | -1.696799 | 2.342663  | N | 2.561504  | -2.025619 | 0.484857  |
| C | 1.924793  | -2.262704 | -0.195256 | C | 1.180218  | -2.137282 | 2.710499  |
| H | 2.568208  | -3.112703 | -0.496002 | H | 1.293780  | -3.135015 | 3.179200  |
| H | 2.169077  | -1.373016 | -0.812845 | H | 0.107870  | -1.965236 | 2.487986  |
| H | 0.859225  | -2.519496 | -0.371824 | H | 1.532596  | -1.361798 | 3.418519  |

## Li<sup>+</sup>(MeCN)<sub>5</sub>

|                                           |                     |
|-------------------------------------------|---------------------|
| E (PBE-D3/ma-def2-svp GAS_OPT) =          | -669.9325182730     |
| E (PBE-D3/ma-def2-svp SMD_OPT) =          | -670.2353950389     |
| $\Delta G_{\text{corr}}$ (ID-RR-HR GAS) = | <b>0.1678198000</b> |
| E (DLPNO-CCSDT/cc-p(wC)VTZ GAS_OPT GAS) = | -670.1640757362     |
| E (DLPNO-CCSDT/cc-p(wC)VTZ GAS_OPT SMD) = | -670.2353950389     |
| E (DLPNO-CCSDT/cc-p(wC)VTZ SMD_OPT SMD) = | -670.2368147974     |
| E (PBE-D3/ma-def2-tzvp GAS_OPT GAS) =     | -670.6586676812     |
| E (PBE-D3/ma-def2-tzvp GAS_OPT SMD) =     | -670.7297892800     |



|                                        |                                 |
|----------------------------------------|---------------------------------|
| E (PBE-D3/ma-def2-tzvp GAS_OPT CPCM) = | -670.7249423088                 |
| GAS_OPT                                | SMD_OPT                         |
| C -3.829553 -1.679885 0.772141         | C -0.904026 1.539039 2.741138   |
| N -2.957956 -1.300017 1.450801         | N -0.589416 0.977056 1.764382   |
| C -4.913268 -2.150333 -0.072780        | C -1.293279 2.235087 3.949618   |
| H -5.600526 -1.314872 -0.312338        | H -0.412003 2.373448 4.606841   |
| H -5.484637 -2.945192 0.446276         | H -2.058643 1.646218 4.492964   |
| H -4.508619 -2.561838 -1.018602        | H -1.715066 3.227777 3.695855   |
| Li -1.439391 -0.668370 2.645001        | Li -0.010617 -0.008436 0.010978 |
| C -2.608243 0.197567 5.496131          | C -2.138624 1.914440 -1.788282  |
| N -2.181401 -0.115724 4.454877         | N -1.406610 1.251428 -1.160140  |
| C -3.138937 0.587972 6.790593          | C -3.043167 2.736424 -2.566861  |
| H -2.852846 -0.155906 7.560328         | H -4.081516 2.610638 -2.200995  |
| H -4.244359 0.649401 6.747203          | H -3.000551 2.441288 -3.634088  |
| H -2.737977 1.578251 7.084280          | H -2.757713 3.803438 -2.477972  |
| C 0.624895 1.336737 1.318395           | C 2.486633 1.148638 -1.744818   |
| N -0.297757 0.785479 1.777374          | N 1.593327 0.733451 -1.113563   |
| C 1.793200 1.988045 0.756387           | C 3.591808 1.662508 -2.526456   |
| H 2.042878 2.896365 1.339380           | H 3.784889 0.995772 -3.390260   |
| H 1.601297 2.278655 -0.295276          | H 4.505311 1.715700 -1.901704   |
| H 2.651138 1.282789 0.791462           | H 3.350594 2.676685 -2.902016   |
| C 5.368747 -0.463003 0.762913          | C -1.598686 -2.683159 -0.972924 |
| N 4.241710 -0.497002 1.081575          | N -1.030116 -1.723371 -0.620224 |
| C 6.768525 -0.419914 0.368405          | C -2.301472 -3.870934 -1.410543 |
| H 6.869903 0.028362 -0.639839          | H -3.375857 -3.642972 -1.557284 |
| H 7.191856 -1.443620 0.343454          | H -2.202137 -4.671426 -0.650872 |
| H 7.352311 0.187482 1.088155           | H -1.875766 -4.229205 -2.368836 |
| C 1.123153 -2.531728 2.710092          | C 2.134181 -1.931999 1.786945   |
| N 0.064696 -2.043178 2.792939          | N 1.389593 -1.267729 1.175129   |
| C 2.451019 -3.103599 2.589109          | C 3.058044 -2.753646 2.542883   |
| H 2.422344 -4.006678 1.948065          | H 3.894215 -2.133128 2.921873   |
| H 2.839464 -3.385467 3.587586          | H 3.469761 -3.553926 1.896392   |
| H 3.128136 -2.350991 2.131091          | H 2.536908 -3.219104 3.402842   |

## DMA

|                                           |                     |
|-------------------------------------------|---------------------|
| E (PBE-D3/ma-def2-svp GAS_OPT) =          | -287.2839327722     |
| E (PBE-D3/ma-def2-svp SMD_OPT) =          | -287.2959546690     |
| $\Delta G_{corr}$ (ID-RR-HR GAS) =        | <b>0.0945535400</b> |
| E (DLPNO-CCSDT/cc-p(wC)VTZ GAS_OPT GAS) = | -287.3732181847     |
| E (DLPNO-CCSDT/cc-p(wC)VTZ GAS_OPT SMD) = | -287.3828292206     |

|                                           |                                 |
|-------------------------------------------|---------------------------------|
| E (DLPNO-CCSDT/cc-p(wC)VTZ SMD_OPT SMD) = | -287.3832678615                 |
| E (PBE-D3/ma-def2-tzvp GAS_OPT GAS) =     | -287.5920600082                 |
| E (PBE-D3/ma-def2-tzvp GAS_OPT SMD) =     | -287.6035466029                 |
| E (PBE-D3/ma-def2-tzvp GAS_OPT CPCM) =    | -287.6041503305                 |
| GAS_OPT                                   | SMD_OPT                         |
| H -1.932162 0.308822 1.531288             | H -1.917858 0.303299 1.525426   |
| O 1.722814 -0.334211 -0.601590            | O 1.733666 -0.341430 -0.608059  |
| C 0.493988 -0.405542 -0.502366            | C 0.493806 -0.407108 -0.503102  |
| N -0.223905 0.474449 0.288806             | N -0.212427 0.469377 0.283389   |
| C 0.486504 1.507793 1.022023              | C 0.484175 1.508470 1.022834    |
| H 1.565371 1.412365 0.805957              | H 1.567076 1.436395 0.821398    |
| H 0.318828 1.400335 2.116231              | H 0.307599 1.396821 2.114725    |
| H 0.137044 2.518326 0.716164              | H 0.121835 2.514178 0.717957    |
| C -1.663136 0.459672 0.461473             | C -1.655631 0.453092 0.455182   |
| H -2.132125 -0.347017 -0.125102           | H -2.127035 -0.352318 -0.130261 |
| H -2.110430 1.426155 0.136908             | H -2.096069 1.421096 0.130410   |
| C -0.289496 -1.475038 -1.254042           | C -0.293000 -1.470538 -1.249829 |
| H -1.020488 -1.036328 -1.963547           | H -1.026036 -1.026116 -1.953595 |
| H 0.439516 -2.076082 -1.824544            | H 0.421253 -2.084555 -1.826841  |
| H -0.843893 -2.147054 -0.567576           | H -0.852923 -2.134019 -0.559550 |

#### (DMA)<sub>4</sub>

|                                           |                     |
|-------------------------------------------|---------------------|
| E (PBE-D3/ma-def2-svp GAS_OPT) =          | -1149.1852821713    |
| E (PBE-D3/ma-def2-svp SMD_OPT) =          | -1149.2106422178    |
| $\Delta G_{corr}$ (ID-RR-HR GAS) =        | <b>0.4455471200</b> |
| E (DLPNO-CCSDT/cc-p(wC)VTZ GAS_OPT GAS) = | -1149.5442039514    |
| E (DLPNO-CCSDT/cc-p(wC)VTZ GAS_OPT SMD) = | -1149.5607800158    |
| E (DLPNO-CCSDT/cc-p(wC)VTZ SMD_OPT SMD) = | -1149.5634200077    |
| E (PBE-D3/ma-def2-tzvp GAS_OPT GAS) =     | -1150.4102376568    |
| E (PBE-D3/ma-def2-tzvp GAS_OPT SMD) =     | -1150.4302364297    |

| E (PBE-D3/ma-def2-tzvp GAS_OPT CPCM) = |           |           |           | -1150.4317374931 |           |           |           |
|----------------------------------------|-----------|-----------|-----------|------------------|-----------|-----------|-----------|
| GAS_OPT                                |           |           |           | SMD_OPT          |           |           |           |
| H                                      | 1.242681  | 2.973889  | 0.945646  | H                | 2.014211  | -2.021571 | -0.692350 |
| O                                      | 1.166875  | -0.671169 | 2.248811  | O                | -1.130718 | -0.435566 | -2.431398 |
| C                                      | 1.317231  | 0.458824  | 1.740290  | C                | -0.229793 | -1.038515 | -1.810634 |
| N                                      | 1.500672  | 1.573363  | 2.515696  | N                | 0.922877  | -1.448295 | -2.427793 |
| C                                      | 1.648505  | 1.444241  | 3.958625  | C                | 1.088244  | -1.266982 | -3.860112 |
| H                                      | 1.623669  | 0.373419  | 4.224102  | H                | 1.125868  | -2.250391 | -4.378506 |
| H                                      | 0.827744  | 1.981288  | 4.477860  | H                | 2.036330  | -0.730454 | -4.076072 |
| H                                      | 2.618708  | 1.882786  | 4.278558  | H                | 0.238681  | -0.685214 | -4.255943 |
| C                                      | 1.522793  | 2.936522  | 2.010700  | C                | 1.950403  | -2.245173 | -1.771343 |
| H                                      | 2.530302  | 3.393281  | 2.134293  | H                | 2.932738  | -2.007774 | -2.224712 |
| H                                      | 0.784790  | 3.542086  | 2.577607  | H                | 1.769865  | -3.335631 | -1.906914 |
| H                                      | 1.852072  | -2.638538 | 1.221048  | H                | -1.416177 | 2.377391  | -5.636386 |
| O                                      | -0.383119 | -2.642044 | -2.006620 | O                | -1.870469 | 4.751961  | -2.332074 |
| C                                      | 0.212881  | -2.810958 | -0.929903 | C                | -1.815258 | 3.685914  | -2.978063 |
| N                                      | 1.587328  | -2.903371 | -0.870207 | N                | -0.812025 | 3.432299  | -3.878373 |
| C                                      | 2.357397  | -2.907321 | -2.101087 | C                | 0.165948  | 4.461986  | -4.188930 |
| H                                      | 1.662894  | -2.799998 | -2.952295 | H                | 0.030526  | 4.831639  | -5.229670 |
| H                                      | 2.923728  | -3.858092 | -2.210246 | H                | 1.196633  | 4.062639  | -4.095425 |
| H                                      | 3.087002  | -2.068176 | -2.113880 | H                | 0.039771  | 5.306171  | -3.489650 |
| C                                      | 2.323380  | -3.152247 | 0.363211  | C                | -0.789397 | 2.246107  | -4.725327 |
| H                                      | 3.344497  | -2.734908 | 0.259967  | H                | -1.127225 | 1.349726  | -4.174958 |
| H                                      | 2.421191  | -4.241337 | 0.576554  | H                | 0.249694  | 2.063224  | -5.059844 |
| H                                      | 0.503924  | -0.622352 | -5.449437 | H                | -0.352542 | 1.674243  | -1.356706 |
| O                                      | -1.144523 | 1.376351  | -1.917189 | O                | 2.885228  | 4.536982  | -1.597675 |
| C                                      | -1.253522 | 0.531569  | -2.824240 | C                | 1.824137  | 4.147251  | -1.072259 |
| N                                      | -0.228570 | 0.278792  | -3.704516 | N                | 1.374761  | 2.860048  | -1.218738 |
| C                                      | 1.056355  | 0.925458  | -3.502512 | C                | 2.143445  | 1.904270  | -1.997608 |
| H                                      | 0.927287  | 1.741152  | -2.769749 | H                | 2.254322  | 0.955419  | -1.436617 |
| H                                      | 1.434819  | 1.342798  | -4.458766 | H                | 3.139723  | 2.324412  | -2.217597 |
| H                                      | 1.810830  | 0.207142  | -3.110120 | H                | 1.632977  | 1.672128  | -2.956813 |
| C                                      | -0.281048 | -0.795328 | -4.688589 | C                | 0.143911  | 2.348882  | -0.634105 |
| H                                      | -1.254370 | -0.812420 | -5.213694 | H                | -0.559819 | 3.161919  | -0.393685 |
| H                                      | -0.119376 | -1.786622 | -4.212237 | H                | 0.342089  | 1.767076  | 0.292040  |
| H                                      | -3.574168 | 0.351115  | 1.151103  | H                | 5.439369  | 2.410479  | 1.585183  |
| O                                      | -1.381147 | 2.837101  | 3.622855  | O                | 2.657897  | -0.669681 | 1.328180  |
| C                                      | -1.701784 | 1.774626  | 3.064711  | C                | 3.560114  | 0.084982  | 0.910487  |
| N                                      | -2.038645 | 1.724866  | 1.731372  | N                | 3.585969  | 1.421676  | 1.213061  |
| C                                      | -2.168810 | 2.962930  | 0.975645  | C                | 2.624102  | 1.972370  | 2.153422  |
| H                                      | -3.240032 | 3.186293  | 0.768242  | H                | 2.155008  | 2.886507  | 1.736128  |
| H                                      | -1.645454 | 2.875258  | 0.002851  | H                | 3.122325  | 2.250590  | 3.108828  |
| H                                      | -1.747617 | 3.787819  | 1.576136  | H                | 1.844255  | 1.220256  | 2.362524  |
| C                                      | -2.474031 | 0.509718  | 1.058020  | C                | 4.651878  | 2.324190  | 0.802739  |
| H                                      | -1.954295 | -0.376636 | 1.460448  | H                | 4.229345  | 3.332574  | 0.627058  |
| H                                      | -2.220958 | 0.593553  | -0.016515 | H                | 5.124875  | 1.996152  | -0.138035 |
| C                                      | -0.536300 | -2.918884 | 0.383841  | C                | -2.864894 | 2.605057  | -2.801791 |
| H                                      | -0.360455 | -3.901836 | 0.867200  | H                | -3.429175 | 2.438923  | -3.743349 |
| H                                      | -0.207004 | -2.137237 | 1.100583  | H                | -2.422752 | 1.629464  | -2.512112 |
| H                                      | -1.614142 | -2.811102 | 0.172467  | H                | -3.572887 | 2.929412  | -2.018577 |
| C                                      | -2.521755 | -0.282090 | -2.993639 | C                | 0.963662  | 5.090911  | -0.252280 |
| H                                      | -3.274962 | 0.098998  | -2.282435 | H                | -0.009605 | 5.270476  | -0.756732 |

|   |           |           |           |   |           |           |           |
|---|-----------|-----------|-----------|---|-----------|-----------|-----------|
| H | -2.935836 | -0.219045 | -4.019727 | H | 0.745397  | 4.700426  | 0.762286  |
| H | -2.307070 | -1.348250 | -2.771608 | H | 1.498728  | 6.052194  | -0.155477 |
| C | 1.308347  | 0.633139  | 0.232182  | C | -0.371962 | -1.348721 | -0.333093 |
| H | 2.128095  | 1.284319  | -0.129059 | H | 0.482374  | -0.973725 | 0.267437  |
| H | 1.418638  | -0.365133 | -0.225668 | H | -1.305799 | -0.886063 | 0.032981  |
| H | 0.353646  | 1.059974  | -0.138248 | H | -0.430869 | -2.444709 | -0.164410 |
| C | -1.722411 | 0.461051  | 3.831117  | C | 4.681925  | -0.452142 | 0.039827  |
| H | -2.694082 | -0.063853 | 3.735214  | H | 5.678628  | -0.238148 | 0.476438  |
| H | -0.926300 | -0.225869 | 3.473927  | H | 4.562325  | -1.546019 | -0.046861 |
| H | -1.541774 | 0.689666  | 4.895687  | H | 4.669597  | -0.014454 | -0.979657 |

## Li<sup>+</sup>(DMA)<sub>4</sub>

|                                           |                     |           |           |    |           |           |           |
|-------------------------------------------|---------------------|-----------|-----------|----|-----------|-----------|-----------|
| E (PBE-D3/ma-def2-svp GAS_OPT) =          | -1156.6263758706    |           |           |    |           |           |           |
| E (PBE-D3/ma-def2-svp SMD_OPT) =          | -1156.6942422775    |           |           |    |           |           |           |
| $\Delta G_{\text{corr}}$ (ID-RR-HR GAS) = | <b>0.4428523800</b> |           |           |    |           |           |           |
| E (DLPNO-CCSDT/cc-p(wC)VTZ GAS_OPT GAS) = | -1157.0037431027    |           |           |    |           |           |           |
| E (DLPNO-CCSDT/cc-p(wC)VTZ GAS_OPT SMD) = | -1157.0661684321    |           |           |    |           |           |           |
| E (DLPNO-CCSDT/cc-p(wC)VTZ SMD_OPT SMD) = | -1157.0687960074    |           |           |    |           |           |           |
| E (PBE-D3/ma-def2-tzvp GAS_OPT GAS) =     | -1157.8559297903    |           |           |    |           |           |           |
| E (PBE-D3/ma-def2-tzvp GAS_OPT SMD) =     | -1157.9193643836    |           |           |    |           |           |           |
| E (PBE-D3/ma-def2-tzvp GAS_OPT CPCM) =    | -1157.9143920821    |           |           |    |           |           |           |
| GAS_OPT                                   | SMD_OPT             |           |           |    |           |           |           |
| Li                                        | -0.055867           | -0.157118 | -0.069582 | Li | -0.585696 | -0.523674 | -1.132167 |
| H                                         | 4.496950            | 3.008417  | -0.445757 | H  | 1.350804  | 2.350033  | 3.332910  |
| O                                         | 1.329712            | 1.014526  | 0.601212  | O  | 0.669750  | 0.401746  | 0.043530  |
| C                                         | 2.312844            | 1.659739  | 0.177347  | C  | 0.752779  | 1.039462  | 1.118978  |
| N                                         | 3.203494            | 2.224640  | 1.044977  | N  | 1.588966  | 0.627477  | 2.110763  |
| C                                         | 3.005046            | 2.083916  | 2.481275  | C  | 2.378491  | -0.584399 | 1.933723  |
| H                                         | 2.079070            | 1.511803  | 2.660703  | H  | 3.419063  | -0.343602 | 1.624890  |
| H                                         | 2.922656            | 3.083301  | 2.958138  | H  | 1.914895  | -1.214556 | 1.157612  |
| H                                         | 3.864673            | 1.551127  | 2.940254  | H  | 2.420620  | -1.143327 | 2.889560  |
| C                                         | 4.376735            | 2.988387  | 0.648897  | C  | 1.809721  | 1.348645  | 3.355653  |
| H                                         | 5.292195            | 2.539895  | 1.089777  | H  | 2.899036  | 1.476454  | 3.524120  |
| H                                         | 4.302168            | 4.035856  | 1.012863  | H  | 1.392544  | 0.785732  | 4.218603  |
| H                                         | 1.529168            | -4.383825 | 2.991551  | H  | 3.524710  | -4.783820 | -0.353924 |

|   |           |           |           |   |           |           |           |
|---|-----------|-----------|-----------|---|-----------|-----------|-----------|
| O | 0.535536  | -1.997709 | 0.088089  | O | 0.102103  | -2.373423 | -1.087530 |
| C | 0.809093  | -2.711013 | 1.079704  | C | 1.338711  | -2.589867 | -1.043772 |
| N | 1.431698  | -3.915068 | 0.922322  | N | 1.862784  | -3.479570 | -0.155870 |
| C | 1.775853  | -4.387488 | -0.412375 | C | 0.990876  | -4.224963 | 0.741086  |
| H | 1.527874  | -3.603185 | -1.146986 | H | 1.101381  | -3.869108 | 1.788578  |
| H | 1.211491  | -5.313028 | -0.654975 | H | 1.259579  | -5.300824 | 0.714176  |
| H | 2.860190  | -4.617442 | -0.468309 | H | -0.058555 | -4.102254 | 0.425100  |
| C | 1.778501  | -4.817081 | 2.010225  | C | 3.284754  | -3.754462 | -0.010671 |
| H | 2.867336  | -5.035283 | 1.993826  | H | 3.572099  | -3.675223 | 1.058789  |
| H | 1.236579  | -5.781542 | 1.904530  | H | 3.898236  | -3.040951 | -0.583731 |
| H | -1.353903 | -0.111177 | -6.052754 | H | 0.142637  | 3.952021  | -4.113898 |
| O | -0.499252 | 0.314025  | -1.908598 | O | -0.526968 | 0.303988  | -2.867757 |
| C | -1.016665 | -0.288979 | -2.877361 | C | -0.327289 | 1.410079  | -3.424891 |
| N | -1.406101 | 0.391310  | -3.994106 | N | -1.074026 | 2.509206  | -3.130540 |
| C | -1.207097 | 1.832095  | -4.078962 | C | -2.211238 | 2.413736  | -2.225698 |
| H | -0.721759 | 2.184846  | -3.153670 | H | -3.153118 | 2.644472  | -2.769050 |
| H | -2.181066 | 2.350227  | -4.205371 | H | -2.108030 | 3.146548  | -1.398670 |
| H | -0.566435 | 2.081276  | -4.950902 | H | -2.276586 | 1.395017  | -1.808011 |
| C | -2.014662 | -0.221258 | -5.165915 | C | -0.901870 | 3.795396  | -3.794632 |
| H | -2.980080 | 0.276248  | -5.396638 | H | -1.162128 | 4.604327  | -3.084710 |
| H | -2.210339 | -1.293344 | -5.007460 | H | -1.567201 | 3.887459  | -4.681490 |
| H | -5.030881 | 2.252807  | 2.464425  | H | -3.055421 | 1.023405  | 3.323803  |
| O | -1.597645 | 0.153117  | 1.076551  | O | -2.309945 | -0.425114 | -0.225876 |
| C | -2.252996 | 1.192865  | 1.309083  | C | -2.712196 | 0.003260  | 0.883313  |
| N | -3.179284 | 1.225073  | 2.310766  | N | -2.205553 | -0.462668 | 2.058035  |
| C | -3.442815 | 0.024163  | 3.092868  | C | -1.279189 | -1.587617 | 2.074578  |
| H | -2.913119 | -0.827893 | 2.634445  | H | -1.752731 | -2.464467 | 2.566423  |
| H | -4.532827 | -0.182164 | 3.112182  | H | -0.368376 | -1.324753 | 2.648973  |
| H | -3.094471 | 0.152081  | 4.140273  | H | -0.996832 | -1.860001 | 1.044627  |
| C | -3.951899 | 2.399068  | 2.688610  | C | -2.657456 | -0.004390 | 3.365558  |
| H | -3.602353 | 3.301340  | 2.162038  | H | -1.799309 | -0.007299 | 4.066267  |
| H | -3.852754 | 2.579822  | 3.779492  | H | -3.441921 | -0.674512 | 3.781098  |
| C | 0.457574  | -2.247223 | 2.480462  | C | 2.280665  | -1.857606 | -1.974374 |
| H | -0.173766 | -2.984129 | 3.015555  | H | 1.675449  | -1.213443 | -2.636438 |
| H | 1.367817  | -2.076515 | 3.090409  | H | 2.990003  | -1.214173 | -1.416068 |
| H | -0.101087 | -1.298806 | 2.397445  | H | 2.876131  | -2.558818 | -2.592900 |
| C | -1.219722 | -1.790351 | -2.828113 | C | 0.766899  | 1.552168  | -4.459923 |
| H | -0.785440 | -2.164691 | -1.884402 | H | 1.207093  | 0.556234  | -4.642513 |
| H | -2.296171 | -2.055246 | -2.857051 | H | 0.384532  | 1.957374  | -5.418217 |
| H | -0.724527 | -2.302223 | -3.677295 | H | 1.570500  | 2.231718  | -4.107849 |
| C | 2.535931  | 1.830541  | -1.313438 | C | -0.074301 | 2.287329  | 1.341918  |
| H | 3.478816  | 1.348747  | -1.642721 | H | 0.568115  | 3.191186  | 1.377962  |
| H | 1.689331  | 1.353965  | -1.838266 | H | -0.768529 | 2.396972  | 0.491439  |
| H | 2.585218  | 2.898473  | -1.606167 | H | -0.653487 | 2.254119  | 2.285416  |
| C | -2.028536 | 2.443800  | 0.480397  | C | -3.784613 | 1.069331  | 0.943336  |
| H | -1.500463 | 3.220329  | 1.070957  | H | -4.630636 | 0.773488  | 1.595020  |
| H | -1.395841 | 2.171852  | -0.382220 | H | -3.385258 | 2.028340  | 1.333548  |
| H | -2.973722 | 2.884104  | 0.107743  | H | -4.165467 | 1.242166  | -0.078212 |

**Li<sup>+</sup> in DMA**

|                                           |                               |
|-------------------------------------------|-------------------------------|
| E (PBE-D3/ma-def2-svp GAS_OPT) =          | -7.2519251623                 |
| E (PBE-D3/ma-def2-svp SMD_OPT) =          | -7.3917970144                 |
| $\Delta G_{\text{corr}}$ (ID-RR-HR GAS) = | -0.0127326619                 |
| E (DLPNO-CCSDT/cc-p(wC)VTZ GAS_OPT GAS) = | -7.2736440090                 |
| E (DLPNO-CCSDT/cc-p(wC)VTZ GAS_OPT SMD) = | -7.4151470685                 |
| E (DLPNO-CCSDT/cc-p(wC)VTZ SMD_OPT SMD) = | -7.4151470685                 |
| E (PBE-D3/ma-def2-tzvp GAS_OPT GAS) =     | -7.2566456293                 |
| E (PBE-D3/ma-def2-tzvp GAS_OPT SMD) =     | -7.3965055394                 |
| E (PBE-D3/ma-def2-tzvp GAS_OPT CPCM) =    | -7.4400964517                 |
| GAS_OPT                                   | SMD_OPT                       |
| Li 0.000000 0.000000 0.000000             | Li 0.000000 0.000000 0.000000 |

**(DMA)<sub>5</sub>**

|                                           |                     |
|-------------------------------------------|---------------------|
| E (PBE-D3/ma-def2-svp GAS_OPT) =          | -1436.4871646214    |
| E (PBE-D3/ma-def2-svp SMD_OPT) =          | -1436.5137231692    |
| $\Delta G_{\text{corr}}$ (ID-RR-HR GAS) = | <b>0.5631541700</b> |
| E (DLPNO-CCSDT/cc-p(wC)VTZ GAS_OPT GAS) = | -1436.9343810755    |
| E (DLPNO-CCSDT/cc-p(wC)VTZ GAS_OPT SMD) = | -1436.9545379897    |
| E (DLPNO-CCSDT/cc-p(wC)VTZ SMD_OPT SMD) = | -1436.9550228148    |
| E (PBE-D3/ma-def2-tzvp GAS_OPT GAS) =     | -1438.0169501172    |
| E (PBE-D3/ma-def2-tzvp GAS_OPT SMD) =     | -1438.0410503756    |

| E (PBE-D3/ma-def2-tzvp GAS_OPT CPCM) = |           |           |           | -1438.0429294882 |           |           |           |
|----------------------------------------|-----------|-----------|-----------|------------------|-----------|-----------|-----------|
| GAS_OPT                                |           |           |           | SMD_OPT          |           |           |           |
| H                                      | 2.643867  | 0.621594  | 3.024577  | H                | 3.702114  | 2.137286  | 1.745733  |
| O                                      | -1.519291 | -0.383506 | 2.303434  | O                | -0.388270 | 1.498637  | 1.908923  |
| C                                      | -0.429534 | 0.058978  | 1.887640  | C                | 0.771029  | 1.251738  | 1.513686  |
| N                                      | 0.569722  | 0.413991  | 2.764954  | N                | 1.844319  | 1.298810  | 2.363496  |
| C                                      | 0.330219  | 0.327327  | 4.194048  | C                | 1.652246  | 1.700060  | 3.746982  |
| H                                      | -0.665468 | -0.118873 | 4.361942  | H                | 0.571738  | 1.773576  | 3.959217  |
| H                                      | 0.365427  | 1.334848  | 4.665507  | H                | 2.126451  | 2.687297  | 3.942371  |
| H                                      | 1.106053  | -0.301572 | 4.681778  | H                | 2.112893  | 0.957435  | 4.431892  |
| C                                      | 1.839196  | 1.000972  | 2.362227  | C                | 3.227360  | 1.147547  | 1.935614  |
| H                                      | 1.821205  | 2.111312  | 2.452496  | H                | 3.316524  | 0.529266  | 1.025211  |
| H                                      | 2.111583  | 0.721197  | 1.330012  | H                | 3.804706  | 0.646179  | 2.738645  |
| H                                      | -0.728866 | -2.837789 | 2.814351  | H                | -0.187844 | -0.988805 | 3.122877  |
| O                                      | -0.731201 | -3.275294 | -1.050220 | O                | -0.819037 | -2.634249 | -0.384688 |
| C                                      | -0.834485 | -3.272531 | 0.189026  | C                | -0.757420 | -2.189536 | 0.780683  |
| N                                      | 0.275989  | -3.272862 | 1.000262  | N                | 0.393567  | -2.261615 | 1.520792  |
| C                                      | 1.600815  | -3.368473 | 0.403934  | C                | 1.562106  | -2.939941 | 0.981325  |
| H                                      | 1.486209  | -3.581821 | -0.673414 | H                | 1.320236  | -3.321138 | -0.025501 |
| H                                      | 2.172140  | -4.192330 | 0.883381  | H                | 1.851080  | -3.792093 | 1.634211  |
| H                                      | 2.168664  | -2.420004 | 0.518497  | H                | 2.425219  | -2.246339 | 0.900784  |
| C                                      | 0.232138  | -3.238561 | 2.451860  | C                | 0.491968  | -1.830427 | 2.908165  |
| H                                      | 1.029657  | -2.563537 | 2.825476  | H                | 1.525126  | -1.485017 | 3.106418  |
| H                                      | 0.403487  | -4.247297 | 2.893079  | H                | 0.268695  | -2.663240 | 3.612669  |
| H                                      | -3.227507 | -0.940894 | -3.219940 | H                | -3.164267 | 0.019272  | -2.510372 |
| O                                      | 0.420264  | 0.948027  | -4.049484 | O                | 0.615374  | 1.201260  | -3.868219 |
| C                                      | -0.291374 | 0.043172  | -3.575828 | C                | -0.190958 | 0.453798  | -3.279606 |
| N                                      | -1.518040 | 0.312581  | -3.020108 | N                | -1.249509 | 0.954239  | -2.563656 |
| C                                      | -2.033660 | 1.675498  | -3.046227 | C                | -1.475868 | 2.387743  | -2.506742 |
| H                                      | -3.039580 | 1.688748  | -3.519597 | H                | -0.768248 | 2.896549  | -3.184246 |
| H                                      | -1.343657 | 2.300766  | -3.639328 | H                | -1.324326 | 2.774534  | -1.475179 |
| H                                      | -2.111220 | 2.099017  | -2.021518 | H                | -2.515547 | 2.627272  | -2.816206 |
| C                                      | -2.416701 | -0.701236 | -2.493292 | C                | -2.244213 | 0.127221  | -1.893123 |
| H                                      | -2.901635 | -0.320206 | -1.570456 | H                | -2.538895 | 0.605720  | -0.939166 |
| H                                      | -1.884159 | -1.632008 | -2.228266 | H                | -1.848653 | -0.874880 | -1.654332 |
| H                                      | -2.919128 | 1.315400  | 3.402193  | H                | -2.532477 | 1.485746  | 3.144495  |
| O                                      | -1.973016 | 3.164070  | 0.054297  | O                | -5.461302 | 0.927278  | -0.021564 |
| C                                      | -2.531843 | 2.676494  | 1.048402  | C                | -5.057237 | 0.708201  | 1.137310  |
| N                                      | -2.107176 | 2.955265  | 2.330080  | N                | -4.065625 | 1.458531  | 1.714933  |
| C                                      | -1.026823 | 3.904530  | 2.531353  | C                | -3.514882 | 2.605735  | 1.009075  |
| H                                      | -1.377420 | 4.799693  | 3.090335  | H                | -2.407387 | 2.549913  | 1.012498  |
| H                                      | -0.653571 | 4.221233  | 1.541098  | H                | -3.821459 | 3.554806  | 1.503957  |
| H                                      | -0.196663 | 3.439460  | 3.105257  | H                | -3.894561 | 2.610563  | -0.027192 |
| C                                      | -2.755699 | 2.404586  | 3.511677  | C                | -3.624743 | 1.307811  | 3.094086  |
| H                                      | -3.723445 | 2.906894  | 3.737470  | H                | -3.821170 | 0.291982  | 3.476154  |
| H                                      | -2.091232 | 2.551641  | 4.383677  | H                | -4.131900 | 2.038759  | 3.764278  |
| H                                      | 4.028931  | -0.315096 | -4.085233 | H                | 3.289513  | -1.657797 | -4.331817 |
| O                                      | 3.095078  | -0.372305 | -0.310140 | O                | 4.005416  | -0.981925 | -0.552644 |
| C                                      | 3.437483  | -0.417469 | -1.508725 | C                | 3.815524  | -1.282746 | -1.750368 |
| N                                      | 3.280947  | 0.649136  | -2.348650 | N                | 3.699936  | -0.328721 | -2.723741 |
| C                                      | 2.681158  | 1.883299  | -1.858204 | C                | 3.828681  | 1.080923  | -2.388656 |
| H                                      | 1.713333  | 2.062307  | -2.370927 | H                | 2.909095  | 1.624637  | -2.688482 |

|   |           |           |           |   |           |           |           |
|---|-----------|-----------|-----------|---|-----------|-----------|-----------|
| H | 3.358287  | 2.739498  | -2.064707 | H | 4.693471  | 1.528286  | -2.925712 |
| H | 2.521915  | 1.799165  | -0.770637 | H | 3.987419  | 1.185818  | -1.302227 |
| C | 3.608007  | 0.652490  | -3.767726 | C | 3.570813  | -0.608531 | -4.145836 |
| H | 4.356656  | 1.445577  | -3.985472 | H | 4.527406  | -0.404445 | -4.677405 |
| H | 2.685696  | 0.852284  | -4.353709 | H | 2.782332  | 0.043861  | -4.572955 |
| C | 4.043148  | -1.693358 | -2.077153 | C | 3.702894  | -2.737257 | -2.171453 |
| H | 4.181959  | -2.399581 | -1.240596 | H | 3.832804  | -3.368134 | -1.274770 |
| H | 3.370707  | -2.161267 | -2.825044 | H | 2.716267  | -2.964159 | -2.624759 |
| H | 5.023613  | -1.520804 | -2.563665 | H | 4.479666  | -3.014561 | -2.912766 |
| C | -2.196590 | -3.252866 | 0.858545  | C | -1.958677 | -1.526407 | 1.426338  |
| H | -2.316625 | -4.072705 | 1.595012  | H | -2.208340 | -1.980781 | 2.406097  |
| H | -2.351062 | -2.288108 | 1.386966  | H | -1.770647 | -0.444904 | 1.588889  |
| H | -2.959838 | -3.365122 | 0.069040  | H | -2.821482 | -1.644229 | 0.748150  |
| C | 0.169810  | -1.404146 | -3.596085 | C | -0.038859 | -1.054952 | -3.320600 |
| H | 1.158686  | -1.433104 | -4.085566 | H | 0.816621  | -1.301425 | -3.971188 |
| H | 0.239301  | -1.848023 | -2.582173 | H | 0.131108  | -1.482001 | -2.310684 |
| H | -0.527491 | -2.047683 | -4.170169 | H | -0.945584 | -1.546885 | -3.728294 |
| C | -0.160202 | 0.225423  | 0.407890  | C | 1.030653  | 0.904268  | 0.062643  |
| H | 0.795296  | -0.233543 | 0.089147  | H | 1.701163  | 0.036410  | -0.076451 |
| H | -0.990042 | -0.243357 | -0.143495 | H | 0.061039  | 0.695341  | -0.415328 |
| H | -0.125157 | 1.298442  | 0.129124  | H | 1.494972  | 1.765388  | -0.460365 |
| C | -3.701393 | 1.718441  | 0.914256  | C | -5.655790 | -0.412758 | 1.970349  |
| H | -3.385557 | 0.699609  | 1.222630  | H | -6.430732 | -0.916998 | 1.366033  |
| H | -4.565964 | 2.010768  | 1.542854  | H | -4.899691 | -1.165693 | 2.272086  |
| H | -4.014330 | 1.703602  | -0.144030 | H | -6.123941 | -0.027109 | 2.899226  |

## Li<sup>+</sup>(DMA)<sub>5</sub>

|                                           |                     |
|-------------------------------------------|---------------------|
| E (PBE-D3/ma-def2-svp GAS_OPT) =          | -1443.9330915087    |
| E (PBE-D3/ma-def2-svp SMD_OPT) =          | -1443.9996813027    |
| $\Delta G_{\text{corr}}$ (ID-RR-HR GAS) = | <b>0.5641638400</b> |
| E (DLPNO-CCSDT/cc-p(wC)VTZ GAS_OPT GAS) = | -1444.4016751848    |
| E (DLPNO-CCSDT/cc-p(wC)VTZ GAS_OPT SMD) = | -1444.4645659387    |
| E (DLPNO-CCSDT/cc-p(wC)VTZ SMD_OPT SMD) = | -1444.4628059089    |
| E (PBE-D3/ma-def2-tzvp GAS_OPT GAS) =     | -1445.4660570978    |
| E (PBE-D3/ma-def2-tzvp GAS_OPT SMD) =     | -1445.5313170723    |
| E (PBE-D3/ma-def2-tzvp GAS_OPT CPCM) =    | -1445.5256698258    |



| GAS_OPT |           |           |           | SMD_OPT |           |           |           |
|---------|-----------|-----------|-----------|---------|-----------|-----------|-----------|
| Li      | -1.279902 | 0.398179  | 0.461406  | Li      | -0.852545 | 1.539367  | 1.006083  |
| H       | 3.999357  | 2.085344  | 1.455704  | H       | -1.063304 | -1.989677 | -3.303955 |
| O       | -0.018150 | 1.480134  | 1.455971  | O       | -1.527821 | 0.898617  | -0.738235 |
| C       | 1.034204  | 2.109427  | 1.196067  | C       | -1.462011 | -0.039723 | -1.567486 |
| N       | 1.999385  | 2.288925  | 2.139145  | N       | -0.305747 | -0.316827 | -2.231913 |
| C       | 1.866278  | 1.663438  | 3.446265  | C       | 0.881476  | 0.491587  | -1.993221 |
| H       | 2.574818  | 0.813428  | 3.548247  | H       | 1.623558  | -0.060296 | -1.379738 |
| H       | 0.835557  | 1.289227  | 3.562574  | H       | 0.600589  | 1.411817  | -1.456441 |
| H       | 2.086148  | 2.400872  | 4.244762  | H       | 1.351624  | 0.755414  | -2.961822 |
| C       | 3.302859  | 2.864628  | 1.836177  | C       | -0.128727 | -1.426400 | -3.155487 |
| H       | 3.728446  | 3.303672  | 2.758537  | H       | 0.642264  | -2.127986 | -2.769655 |
| H       | 3.224583  | 3.671281  | 1.086821  | H       | 0.213800  | -1.052693 | -4.143329 |
| H       | 2.580257  | -3.337432 | 1.537266  | H       | 5.046608  | 1.867268  | 1.410310  |
| O       | -0.533803 | -1.398461 | 0.241640  | O       | 1.005937  | 2.066646  | 0.942364  |
| C       | 0.360810  | -2.057017 | 0.812951  | C       | 2.141407  | 1.546504  | 1.074185  |
| N       | 0.964013  | -3.110102 | 0.181593  | N       | 3.203347  | 1.970943  | 0.336047  |
| C       | 0.499522  | -3.536563 | -1.128609 | C       | 3.067769  | 3.093948  | -0.580116 |
| H       | -0.325899 | -2.875386 | -1.442646 | H       | 3.326487  | 2.786267  | -1.615180 |
| H       | 0.138597  | -4.586446 | -1.092843 | H       | 3.749565  | 3.918931  | -0.283089 |
| H       | 1.324082  | -3.476994 | -1.870287 | H       | 2.027658  | 3.460639  | -0.558671 |
| C       | 2.025153  | -3.909265 | 0.774809  | C       | 4.547287  | 1.430525  | 0.517696  |
| H       | 2.744876  | -4.200906 | -0.016151 | H       | 5.157463  | 1.685868  | -0.368609 |
| H       | 1.633879  | -4.842405 | 1.237514  | H       | 4.525904  | 0.328841  | 0.609169  |
| H       | -2.940860 | -0.907607 | -4.493610 | H       | -1.862893 | -4.137949 | 1.770360  |
| O       | -1.410951 | 0.940701  | -1.426980 | O       | -1.097875 | -0.111938 | 2.049602  |
| C       | -2.006828 | 0.342738  | -2.348451 | C       | -1.813824 | -1.117426 | 1.831494  |
| N       | -1.747171 | 0.638106  | -3.658576 | N       | -1.345555 | -2.176344 | 1.112909  |
| C       | -0.825141 | 1.714314  | -3.993833 | C       | 0.043522  | -2.192302 | 0.673375  |
| H       | -0.414405 | 2.139298  | -3.063135 | H       | 0.442799  | -1.166724 | 0.673631  |
| H       | -1.350621 | 2.512165  | -4.560433 | H       | 0.108025  | -2.615275 | -0.346897 |
| H       | 0.004828  | 1.331948  | -4.625045 | H       | 0.667068  | -2.815713 | 1.349306  |
| C       | -2.420203 | 0.017248  | -4.789792 | C       | -2.085855 | -3.420889 | 0.949475  |
| H       | -1.674860 | -0.244478 | -5.568787 | H       | -1.792426 | -3.897664 | -0.005810 |
| H       | -3.160561 | 0.709984  | -5.247630 | H       | -3.174774 | -3.244764 | 0.918378  |
| H       | -4.910960 | 1.731977  | 4.863535  | H       | -5.368331 | 4.816289  | 3.638939  |
| O       | -2.995556 | 0.348952  | 1.308451  | O       | -1.956042 | 2.981361  | 1.677140  |
| C       | -4.002033 | 0.599737  | 2.002961  | C       | -3.195330 | 3.162471  | 1.754333  |
| N       | -3.989445 | 1.568623  | 2.963470  | N       | -3.714307 | 4.152619  | 2.532268  |
| C       | -2.780532 | 2.342609  | 3.218244  | C       | -2.834883 | 5.077563  | 3.232057  |
| H       | -2.512377 | 2.276141  | 4.293600  | H       | -3.024501 | 5.040635  | 4.325421  |
| H       | -2.949048 | 3.412462  | 2.971094  | H       | -3.013751 | 6.117061  | 2.882911  |
| H       | -1.943831 | 1.960154  | 2.609590  | H       | -1.784430 | 4.803700  | 3.035154  |
| C       | -5.133004 | 1.923089  | 3.791579  | C       | -5.139297 | 4.440783  | 2.622557  |
| H       | -6.031267 | 1.349066  | 3.514975  | H       | -5.749115 | 3.537081  | 2.452734  |
| H       | -5.364095 | 3.003665  | 3.679640  | H       | -5.444077 | 5.221479  | 1.890273  |
| H       | 4.677099  | -2.141658 | -2.630689 | H       | 3.084200  | -2.894178 | -4.029871 |
| O       | 2.962860  | -0.170385 | 0.250954  | O       | 3.487934  | -1.887445 | -0.255989 |
| C       | 3.561698  | -0.840499 | -0.606306 | C       | 3.483449  | -2.158909 | -1.472954 |
| N       | 3.049987  | -1.008021 | -1.872657 | N       | 2.966570  | -3.337584 | -1.950627 |
| C       | 1.801066  | -0.346793 | -2.225199 | C       | 2.525799  | -4.364945 | -1.019377 |
| H       | 1.209282  | -0.148383 | -1.317196 | H       | 1.505364  | -4.715524 | -1.279329 |
| H       | 1.214191  | -0.999553 | -2.901992 | H       | 2.526855  | -3.954613 | 0.004474  |
| H       | 1.986486  | 0.616060  | -2.751031 | H       | 3.207519  | -5.243138 | -1.055932 |

|   |           |           |           |   |           |           |           |
|---|-----------|-----------|-----------|---|-----------|-----------|-----------|
| C | 3.765898  | -1.627291 | -2.976097 | C | 3.061688  | -3.756548 | -3.342245 |
| H | 4.063870  | -0.868665 | -3.734046 | H | 2.178098  | -4.373540 | -3.600428 |
| H | 3.119805  | -2.374513 | -3.484495 | H | 3.971665  | -4.372465 | -3.521032 |
| C | 4.888588  | -1.507995 | -0.278398 | C | 4.064068  | -1.192539 | -2.488911 |
| H | 5.075238  | -1.371218 | 0.800787  | H | 4.340427  | -0.260537 | -1.966541 |
| H | 4.895734  | -2.591645 | -0.509832 | H | 4.974979  | -1.616812 | -2.960300 |
| H | 5.725964  | -1.041886 | -0.837303 | H | 3.360274  | -0.946286 | -3.308221 |
| C | 0.818267  | -1.708051 | 2.210751  | C | 2.379400  | 0.421467  | 2.053976  |
| H | 0.860021  | -2.588253 | 2.880910  | H | 2.741297  | -0.488573 | 1.532699  |
| H | 1.824261  | -1.243532 | 2.160449  | H | 3.145762  | 0.700077  | 2.806168  |
| H | 0.119307  | -0.962326 | 2.623557  | H | 1.428691  | 0.194975  | 2.566660  |
| C | -3.032471 | -0.730369 | -2.038968 | C | -3.229410 | -1.185192 | 2.359757  |
| H | -3.173412 | -0.765805 | -0.944857 | H | -3.972341 | -1.266607 | 1.540221  |
| H | -4.007853 | -0.523637 | -2.522560 | H | -3.375659 | -2.059911 | 3.025415  |
| H | -2.690612 | -1.728315 | -2.380887 | H | -3.431451 | -0.264417 | 2.933425  |
| C | 1.255393  | 2.715461  | -0.172723 | C | -2.685664 | -0.879491 | -1.866297 |
| H | 0.393512  | 2.448373  | -0.807978 | H | -2.984184 | -0.797477 | -2.931192 |
| H | 1.337534  | 3.820015  | -0.117281 | H | -2.522984 | -1.953980 | -1.651497 |
| H | 2.183701  | 2.322241  | -0.629459 | H | -3.517764 | -0.517191 | -1.238108 |
| C | -5.281076 | -0.188829 | 1.785515  | C | -4.156741 | 2.288439  | 0.978731  |
| H | -6.112781 | 0.460217  | 1.444088  | H | -3.565758 | 1.602249  | 0.346438  |
| H | -5.083761 | -0.946439 | 1.008167  | H | -4.806555 | 1.695068  | 1.653581  |
| H | -5.613948 | -0.706775 | 2.706999  | H | -4.822263 | 2.891988  | 0.328792  |

## DME

|                                           |                     |
|-------------------------------------------|---------------------|
| E (PBE-D3/ma-def2-svp GAS_OPT) =          | -308.2661632815     |
| E (PBE-D3/ma-def2-svp SMD_OPT) =          | -308.2729971294     |
| $\Delta G_{\text{corr}}$ (ID-RR-HR GAS) = | <b>0.1040877592</b> |
| E (DLPNO-CCSDT/cc-p(wC)VTZ GAS_OPT GAS) = | -308.3909223370     |
| E (DLPNO-CCSDT/cc-p(wC)VTZ GAS_OPT SMD) = | -308.3962524010     |
| E (DLPNO-CCSDT/cc-p(wC)VTZ SMD_OPT SMD) = | -308.3964229470     |
| E (PBE-D3/ma-def2-tzvp GAS_OPT GAS) =     | -308.6047305582     |
| E (PBE-D3/ma-def2-tzvp GAS_OPT SMD) =     | -308.6111893030     |
| E (PBE-D3/ma-def2-tzvp GAS_OPT CPCM) =    | -308.6109937200     |
| GAS_OPT                                   | SMD_OPT             |



|   |           |           |           |   |           |           |           |
|---|-----------|-----------|-----------|---|-----------|-----------|-----------|
| H | -1.686365 | 0.646589  | -1.218292 | H | -1.564909 | 0.559736  | -1.115482 |
| C | -1.394064 | -0.521564 | 0.534455  | C | -1.413385 | -0.786505 | 0.529433  |
| H | -1.723766 | 0.336152  | 1.170111  | H | -1.580625 | 0.079548  | 1.214849  |
| H | -0.293517 | -0.461048 | 0.457498  | H | -0.320138 | -0.925731 | 0.431445  |
| O | -1.670604 | -1.757414 | 1.186599  | O | -1.908303 | -1.985029 | 1.124385  |
| C | -3.026034 | -1.966967 | 1.508982  | C | -3.274860 | -1.940054 | 1.480477  |
| H | -3.664946 | -2.116453 | 0.607161  | H | -3.954822 | -1.933641 | 0.596176  |
| H | -3.080274 | -2.885415 | 2.126240  | H | -3.494497 | -2.851068 | 2.072989  |
| H | -3.447331 | -1.115793 | 2.099161  | H | -3.512279 | -1.045235 | 2.106566  |
| O | 0.754830  | 1.159402  | -2.176539 | O | 0.776701  | 1.216702  | -2.243031 |
| C | 1.474380  | -0.025858 | -2.469420 | C | 1.419728  | -0.002391 | -2.567610 |
| H | 2.486641  | 0.207507  | -2.882575 | H | 2.504127  | 0.155256  | -2.791515 |
| H | 1.594226  | -0.659701 | -1.562977 | H | 1.342568  | -0.743665 | -1.741137 |
| H | 0.899151  | -0.584857 | -3.230837 | H | 0.932079  | -0.414985 | -3.472161 |
| C | 1.374979  | 1.916374  | -1.155057 | C | 1.260390  | 1.768058  | -1.026806 |
| H | 2.374939  | 2.288434  | -1.497725 | H | 2.351852  | 2.000687  | -1.114991 |
| H | 1.539921  | 1.288918  | -0.247379 | H | 1.141955  | 1.040405  | -0.189423 |
| C | 0.516830  | 3.111958  | -0.800742 | C | 0.531068  | 3.052790  | -0.705357 |
| H | 0.194348  | 3.628462  | -1.738437 | H | 0.546480  | 3.729402  | -1.595704 |
| H | 1.131318  | 3.839763  | -0.211950 | H | 1.080152  | 3.579841  | 0.114027  |
| O | -0.609778 | 2.699050  | -0.047610 | O | -0.804692 | 2.782608  | -0.311746 |
| C | -1.515201 | 3.744999  | 0.217143  | C | -1.536984 | 3.956530  | -0.027719 |
| H | -1.928718 | 4.185052  | -0.722736 | H | -1.610471 | 4.628157  | -0.917138 |
| H | -2.349913 | 3.322987  | 0.810065  | H | -2.560025 | 3.653114  | 0.270933  |
| H | -1.040980 | 4.569405  | 0.804676  | H | -1.081073 | 4.540195  | 0.808942  |
| O | 1.779244  | -2.111878 | 0.351273  | O | 1.800951  | -2.088992 | 0.399380  |
| C | 1.093894  | -3.215501 | -0.218414 | C | 1.212790  | -3.293736 | -0.057962 |
| H | 0.008106  | -3.187622 | 0.022419  | H | 0.197017  | -3.448249 | 0.373746  |
| H | 1.213756  | -3.146004 | -1.316163 | H | 1.119103  | -3.225879 | -1.159121 |
| H | 1.528586  | -4.183663 | 0.130919  | H | 1.846758  | -4.179067 | 0.190640  |
| C | 1.703386  | -2.090462 | 1.764883  | C | 2.005721  | -2.078181 | 1.802909  |
| H | 2.245622  | -2.969758 | 2.197393  | H | 2.745569  | -2.864535 | 2.094338  |
| H | 0.640332  | -2.144901 | 2.101260  | H | 1.052879  | -2.302388 | 2.341680  |
| C | 2.339194  | -0.823019 | 2.297952  | C | 2.532554  | -0.732032 | 2.247290  |
| H | 3.351773  | -0.686600 | 1.842816  | H | 3.394808  | -0.432059 | 1.601724  |
| H | 2.478207  | -0.929674 | 3.403225  | H | 2.920268  | -0.829269 | 3.291777  |
| O | 1.510230  | 0.288255  | 2.010917  | O | 1.503850  | 0.242662  | 2.190044  |
| C | 2.003636  | 1.509598  | 2.508225  | C | 1.949486  | 1.532328  | 2.553695  |
| H | 3.001364  | 1.765527  | 2.073329  | H | 2.762252  | 1.900905  | 1.882136  |
| H | 1.276455  | 2.295657  | 2.226000  | H | 1.084234  | 2.219698  | 2.481310  |
| H | 2.106652  | 1.494353  | 3.620764  | H | 2.335365  | 1.558931  | 3.601901  |

### Li<sup>+</sup>(DME)<sub>3</sub>

|                                           |                     |
|-------------------------------------------|---------------------|
| E (PBE-D3/ma-def2-svp GAS_OPT) =          | -932.2660978654     |
| E (PBE-D3/ma-def2-svp SMD_OPT) =          | -932.3265943452     |
| $\Delta G_{\text{corr}}$ (ID-RR-HR GAS) = | <b>0.3662557700</b> |

|                                           |                                 |
|-------------------------------------------|---------------------------------|
| E (DLPNO-CCSDT/cc-p(wC)VTZ GAS_OPT GAS) = | -932.6572162484                 |
| E (DLPNO-CCSDT/cc-p(wC)VTZ GAS_OPT SMD) = | -932.7171608941                 |
| E (DLPNO-CCSDT/cc-p(wC)VTZ SMD_OPT SMD) = | -932.7167204400                 |
| E (PBE-D3/ma-def2-tzvp GAS_OPT GAS) =     | -933.2718368106                 |
| E (PBE-D3/ma-def2-tzvp GAS_OPT SMD) =     | -933.3325937209                 |
| E (PBE-D3/ma-def2-tzvp GAS_OPT CPCM) =    | -933.3276881664                 |
| GAS_OPT                                   | SMD_OPT                         |
| Li 0.023422 0.011009 0.029569             | Li 0.023786 0.012337 0.030254   |
| O -0.327943 2.147685 -0.235090            | O -0.348378 2.143295 -0.195691  |
| C 0.867389 2.714691 -0.763751             | C 0.843126 2.717797 -0.726131   |
| H 0.975750 2.432530 -1.837308             | H 0.956590 2.434772 -1.798926   |
| H 0.837312 3.827153 -0.703161             | H 0.806346 3.830088 -0.667967   |
| C -1.501634 2.687304 -0.827664            | C -1.527137 2.687647 -0.768975  |
| H -2.370744 2.211987 -0.338092            | H -2.394246 2.194090 -0.293279  |
| H -1.557961 3.787392 -0.670185            | H -1.593130 3.783046 -0.577256  |
| H -1.533670 2.481197 -1.921484            | H -1.564284 2.521398 -1.869541  |
| O -1.947530 -0.716364 -0.385847           | O -1.928016 -0.696262 -0.434200 |
| C -2.261537 -0.720437 -1.775401           | C -2.209850 -0.693057 -1.831584 |
| H -2.622320 0.288557 -2.083517            | H -2.569726 0.315485 -2.141732  |
| H -3.073239 -1.450837 -1.997667           | H -3.011078 -1.427180 -2.078025 |
| C -3.093432 -0.567340 0.446503            | C -3.091739 -0.559163 0.371048  |
| H -2.730276 -0.472614 1.485001            | H -2.757403 -0.406985 1.413465  |
| H -3.673242 0.345471 0.179206             | H -3.706785 0.315117 0.056811   |
| H -3.765688 -1.449498 0.358289            | H -3.727154 -1.472002 0.311576  |
| O -0.368534 0.130274 2.114541             | O -0.405806 0.079967 2.097467   |
| C -0.380575 1.329676 2.882346             | C -0.404421 1.253899 2.898103   |
| H -0.751405 2.134253 2.223780             | H -0.749091 2.088333 2.261465   |
| H -1.045034 1.227100 3.768768             | H -1.089542 1.142132 3.769202   |
| H 0.643669 1.590125 3.234619              | H 0.616484 1.483597 3.281285    |
| C 0.148098 -0.987361 2.830374             | C 0.049828 -1.074225 2.797846   |
| H -0.424120 -1.153777 3.772457            | H -0.583328 -1.269215 3.694373  |
| H 1.212871 -0.801472 3.106589             | H 1.097299 -0.917649 3.147999   |
| C -1.019557 -1.109237 -2.551864           | C -0.950139 -1.071792 -2.580514 |
| H -1.197548 -0.929314 -3.637050           | H -1.104277 -0.877798 -3.666889 |
| H -0.793930 -2.193424 -2.422386           | H -0.725605 -2.157141 -2.460496 |
| C 2.036261 2.204890 0.050287              | C 2.011706 2.222827 0.094256    |
| H 2.987295 2.581216 -0.393056             | H 2.960619 2.602209 -0.351121   |
| H 1.976673 2.580959 1.098905              | H 1.947709 2.608796 1.138896    |
| C 0.033864 -2.213233 1.951162             | C -0.026475 -2.261637 1.865931  |
| H -1.034825 -2.467542 1.758591            | H -1.084329 -2.503200 1.608229  |
| H 0.504521 -3.080241 2.469703             | H 0.413101 -3.149774 2.375692   |
| O 0.694366 -1.943305 0.717888             | O 0.701225 -1.945629 0.681906   |
| C 0.784440 -3.087818 -0.119921            | C 0.871741 -3.062421 -0.177231  |
| H 1.332057 -2.790385 -1.032385            | H 1.449535 -2.727688 -1.058114  |

|   |           |           |           |   |           |           |           |
|---|-----------|-----------|-----------|---|-----------|-----------|-----------|
| H | 1.343841  | -3.907331 | 0.383676  | H | 1.440608  | -3.873000 | 0.333087  |
| H | -0.225446 | -3.464366 | -0.399702 | H | -0.105787 | -3.477910 | -0.512139 |
| O | 2.003087  | 0.780995  | 0.044228  | O | 1.989026  | 0.798155  | 0.100475  |
| C | 3.110522  | 0.192774  | 0.719456  | C | 3.064060  | 0.228510  | 0.834677  |
| H | 2.961074  | -0.900771 | 0.698989  | H | 3.046872  | 0.556874  | 1.899505  |
| H | 4.067477  | 0.455358  | 0.216396  | H | 2.948498  | -0.869275 | 0.792576  |
| H | 3.161113  | 0.534022  | 1.778691  | H | 4.044929  | 0.517567  | 0.393275  |
| O | 0.075458  | -0.329443 | -2.080144 | O | 0.132583  | -0.295914 | -2.072693 |
| C | 1.244310  | -0.462000 | -2.882929 | C | 1.319097  | -0.416614 | -2.846777 |
| H | 1.546632  | -1.529095 | -2.986550 | H | 1.594137  | -1.483606 | -3.011797 |
| H | 1.076944  | -0.043406 | -3.900124 | H | 1.197174  | 0.069898  | -3.841271 |
| H | 2.051743  | 0.093997  | -2.374737 | H | 2.131643  | 0.081300  | -2.287052 |

## Li<sup>+</sup> in DME

|                                           |                               |
|-------------------------------------------|-------------------------------|
| E (PBE-D3/ma-def2-svp GAS_OPT) =          | -7.2519251623                 |
| E (PBE-D3/ma-def2-svp SMD_OPT) =          | -7.3917970144                 |
| $\Delta G_{\text{corr}}$ (ID-RR-HR GAS) = | -0.0127326619                 |
| E (DLPNO-CCSDT/cc-p(wC)VTZ GAS_OPT GAS) = | -7.2736440090                 |
| E (DLPNO-CCSDT/cc-p(wC)VTZ GAS_OPT SMD) = | -7.3997425591                 |
| E (DLPNO-CCSDT/cc-p(wC)VTZ SMD_OPT SMD) = | -7.3997425591                 |
| E (PBE-D3/ma-def2-tzvp GAS_OPT GAS) =     | -7.2566456293                 |
| E (PBE-D3/ma-def2-tzvp GAS_OPT SMD) =     | -7.3815222019                 |
| E (PBE-D3/ma-def2-tzvp GAS_OPT CPCM) =    | -7.4201253171                 |
| GAS_OPT                                   | SMD_OPT                       |
| Li 0.000000 0.000000 0.000000             | Li 0.000000 0.000000 0.000000 |

## (DME)<sub>4</sub>

|                                  |                  |
|----------------------------------|------------------|
| E (PBE-D3/ma-def2-svp GAS_OPT) = | -1233.1001152192 |
|----------------------------------|------------------|

|                                           |                                 |
|-------------------------------------------|---------------------------------|
| E (PBE-D3/ma-def2-svp SMD_OPT) =          | -1233.1170715630                |
| $\Delta G_{corr}$ (ID-RR-HR GAS) =        | <b>0.4836008500</b>             |
| E (DLPNO-CCSDT/cc-p(wC)VTZ GAS_OPT GAS) = | -1233.5968068721                |
| E (DLPNO-CCSDT/cc-p(wC)VTZ GAS_OPT SMD) = | -1233.6089680784                |
| E (DLPNO-CCSDT/cc-p(wC)VTZ SMD_OPT SMD) = | -1233.6104066100                |
| E (PBE-D3/ma-ma-def2-tzvp GAS_OPT GAS) =  | -1234.4467290682                |
| E (PBE-D3/ma-ma-def2-tzvp GAS_OPT SMD) =  | -1234.4599872972                |
| E (PBE-D3/ma-def2-tzvp GAS_OPT CPCM) =    | -1234.4602519874                |
| <b>GAS_OPT</b>                            | <b>SMD_OPT</b>                  |
| O 3.692032 -0.376620 -1.229053            | O 3.891746 -0.384148 -1.187013  |
| C 3.351950 -1.709296 -1.559296            | C 3.585088 -1.727326 -1.508536  |
| H 4.222429 -2.399994 -1.441843            | H 4.463103 -2.402954 -1.364160  |
| H 2.509530 -2.078741 -0.928980            | H 2.739107 -2.113333 -0.892154  |
| H 3.037962 -1.716302 -2.620903            | H 3.291213 -1.759282 -2.576393  |
| C 4.103524 -0.227052 0.114018             | C 4.258463 -0.209111 0.172219   |
| H 5.130560 -0.646997 0.264866             | H 5.300206 -0.573711 0.351963   |
| H 3.415445 -0.778298 0.798773             | H 3.583011 -0.798040 0.837244   |
| C 4.108213 1.240532 0.491235              | C 4.172570 1.253168 0.551048    |
| H 4.684199 1.821800 -0.271045             | H 4.745878 1.873079 -0.182388   |
| H 4.635266 1.360526 1.471803              | H 4.656620 1.392794 1.549892    |
| O 2.778518 1.710441 0.578615              | O 2.814282 1.649457 0.591906    |
| C 2.677574 3.080911 0.905446              | C 2.625845 3.008725 0.927074    |
| H 3.197986 3.720735 0.151947              | H 3.106137 3.690324 0.183154    |
| H 1.602456 3.344100 0.913998              | H 1.535364 3.203204 0.932659    |
| H 3.121506 3.297855 1.907863              | H 3.047276 3.249321 1.933931    |
| O -1.948827 -2.241732 -1.903542           | O -2.449817 -1.670470 -1.982602 |
| C -1.957645 -2.011007 -3.291676           | C -2.675134 -0.751903 -3.032351 |
| H -2.968914 -2.184559 -3.735968           | H -3.766382 -0.607043 -3.228327 |
| H -1.645271 -0.968431 -3.544430           | H -2.225340 0.244599 -2.813203  |
| H -1.241913 -2.717659 -3.756036           | H -2.207278 -1.162610 -3.949400 |
| C -2.835884 -1.388052 -1.199113           | C -2.954783 -1.204275 -0.740430 |
| H -3.873087 -1.503292 -1.606000           | H -4.046508 -0.975043 -0.833498 |
| H -2.546374 -0.316407 -1.335404           | H -2.449356 -0.253452 -0.445295 |
| C -2.786574 -1.684230 0.293233            | C -2.698306 -2.222037 0.357886  |
| H -3.477146 -0.961862 0.798822            | H -3.043872 -1.768809 1.319338  |
| H -1.768741 -1.496107 0.683361            | H -1.609664 -2.401911 0.451843  |
| O -3.109129 -3.016875 0.663281            | O -3.302766 -3.499926 0.171746  |
| C -4.426283 -3.415237 0.364575            | C -4.715571 -3.482675 0.157006  |
| H -4.609481 -3.518827 -0.731260           | H -5.135505 -3.011617 -0.762860 |
| H -4.585586 -4.405637 0.834869            | H -5.062026 -4.535428 0.188899  |
| H -5.180955 -2.700818 0.778314            | H -5.134973 -2.946308 1.043357  |

|   |           |           |           |   |           |           |           |
|---|-----------|-----------|-----------|---|-----------|-----------|-----------|
| O | -0.557237 | 1.338327  | -1.054660 | O | -0.414091 | 1.160240  | -1.230648 |
| C | 0.377503  | 0.367733  | -1.510001 | C | 0.515372  | 0.143773  | -1.573412 |
| H | 0.281842  | 0.204905  | -2.611386 | H | 0.490496  | -0.080636 | -2.668538 |
| H | 1.420684  | 0.674196  | -1.280671 | H | 1.551209  | 0.431056  | -1.289097 |
| H | 0.157680  | -0.577738 | -0.982650 | H | 0.230529  | -0.766956 | -1.015725 |
| C | -0.370480 | 2.604356  | -1.645697 | C | -0.134812 | 2.406145  | -1.837981 |
| H | -0.651220 | 2.583836  | -2.730266 | H | -0.273574 | 2.350107  | -2.947330 |
| H | 0.701135  | 2.915779  | -1.589634 | H | 0.925091  | 2.708163  | -1.655131 |
| C | -1.231150 | 3.628554  | -0.935148 | C | -1.071216 | 3.457990  | -1.283688 |
| H | -2.265300 | 3.219946  | -0.821095 | H | -2.120167 | 3.076056  | -1.325877 |
| H | -1.300835 | 4.555901  | -1.557152 | H | -1.024399 | 4.371438  | -1.926650 |
| O | -0.673923 | 3.925585  | 0.334142  | O | -0.711911 | 3.769324  | 0.054651  |
| C | -1.519015 | 4.704568  | 1.149766  | C | -1.715762 | 4.475602  | 0.752755  |
| H | -2.483495 | 4.182423  | 1.361104  | H | -2.662225 | 3.887308  | 0.825659  |
| H | -0.991701 | 4.878714  | 2.107770  | H | -1.340398 | 4.672533  | 1.776526  |
| H | -1.753077 | 5.693572  | 0.685692  | H | -1.954612 | 5.454527  | 0.270333  |
| O | 0.547901  | -2.260174 | 0.693816  | O | 0.716478  | -2.441594 | 0.882267  |
| C | 0.282643  | -3.615398 | 0.382614  | C | 0.914320  | -3.837567 | 0.800058  |
| H | -0.527564 | -4.026690 | 1.026929  | H | 0.255889  | -4.393276 | 1.510573  |
| H | -0.070364 | -3.641642 | -0.665335 | H | 0.664605  | -4.154631 | -0.231799 |
| H | 1.195985  | -4.249886 | 0.493793  | H | 1.972109  | -4.124349 | 1.016396  |
| C | 0.897496  | -2.027938 | 2.045673  | C | 1.018085  | -1.912242 | 2.164795  |
| H | 1.947714  | -2.361739 | 2.247002  | H | 2.106867  | -2.036143 | 2.388830  |
| H | 0.227043  | -2.604936 | 2.727463  | H | 0.457928  | -2.467389 | 2.957112  |
| C | 0.764759  | -0.548983 | 2.349673  | C | 0.667274  | -0.442111 | 2.223865  |
| H | 1.258963  | 0.050304  | 1.550480  | H | 1.073615  | 0.082826  | 1.330335  |
| H | 1.296762  | -0.322157 | 3.309543  | H | 1.173256  | 0.005892  | 3.116952  |
| O | -0.608326 | -0.220029 | 2.453722  | O | -0.739406 | -0.276124 | 2.320152  |
| C | -0.851425 | 1.173059  | 2.405835  | C | -1.135575 | 1.071804  | 2.125670  |
| H | -0.535872 | 1.613761  | 1.434983  | H | -0.859958 | 1.439690  | 1.113353  |
| H | -1.943499 | 1.318251  | 2.526154  | H | -2.237174 | 1.115702  | 2.245052  |
| H | -0.330968 | 1.710670  | 3.237071  | H | -0.676470 | 1.749583  | 2.887987  |

### Li<sup>+</sup>(DME)<sub>4</sub>

|                                           |                     |
|-------------------------------------------|---------------------|
| E (PBE-D3/ma-def2-svp GAS_OPT) =          | -1240.5516629293    |
| E (PBE-D3/ma-def2-svp SMD_OPT) =          | -1240.6111378351    |
| $\Delta G_{\text{corr}}$ (ID-RR-HR GAS) = | <b>0.4930091000</b> |
| E (DLPNO-CCSDT/cc-p(wC)VTZ GAS_OPT GAS) = | -1241.0670083397    |
| E (DLPNO-CCSDT/cc-p(wC)VTZ GAS_OPT SMD) = | -1241.1230475676    |
| E (DLPNO-CCSDT/cc-p(wC)VTZ SMD_OPT SMD) = | -1241.1254624266    |



|                                        |                                 |
|----------------------------------------|---------------------------------|
| E (PBE-D3/ma-def2-tzvp GAS_OPT GAS) =  | -1241.8928591184                |
| E (PBE-D3/ma-def2-tzvp GAS_OPT SMD) =  | -1241.9493970807                |
| E (PBE-D3/ma-def2-tzvp GAS_OPT CPCM) = | -1241.9452731665                |
| GAS_OPT                                | SMD_OPT                         |
| Li -0.148838 -0.608536 1.366561        | Li -0.568124 -0.769829 0.998946 |
| O 1.823250 1.613048 -3.795322          | O 2.253952 0.887517 -2.753825   |
| C 2.923245 2.461721 -4.073161          | C 3.400160 0.097703 -2.506098   |
| H 3.418154 2.191729 -5.035006          | H 3.956019 -0.132326 -3.446478  |
| H 2.614242 3.532362 -4.126028          | H 4.107309 0.596923 -1.800915   |
| H 3.654551 2.340851 -3.251174          | H 3.063420 -0.855851 -2.056001  |
| C 0.805315 1.685301 -4.776205          | C 2.565477 2.129885 -3.367401   |
| H 1.204149 1.418909 -5.786493          | H 3.020543 1.963414 -4.374439   |
| H 0.413677 2.729909 -4.856367          | H 3.312583 2.692535 -2.755811   |
| C -0.307180 0.702599 -4.439301         | C 1.314513 2.961377 -3.535413   |
| H 0.119627 -0.318676 -4.367741         | H 0.517496 2.350999 -4.028083   |
| H -1.046259 0.707159 -5.277026         | H 1.545599 3.813680 -4.220558   |
| O -0.960768 0.933926 -3.198235         | O 0.869335 3.444938 -2.277192   |
| C -1.775941 2.090154 -3.159569         | C -0.312441 4.215068 -2.379308  |
| H -2.338478 2.060959 -2.206088         | H -0.560812 4.593261 -1.368338  |
| H -1.183415 3.033463 -3.188143         | H -0.176966 5.091473 -3.057785  |
| H -2.506392 2.108182 -4.002231         | H -1.172817 3.615099 -2.762126  |
| O 1.390823 -1.186235 0.019858          | O 0.149761 -1.469236 -0.883362  |
| C 1.768565 -2.517339 -0.304791         | C 0.745586 -2.729670 -1.148225  |
| H 1.184548 -2.906867 -1.169962         | H -0.008371 -3.477579 -1.487139 |
| H 2.850595 -2.573143 -0.560167         | H 1.525770 -2.649921 -1.939266  |
| H 1.558740 -3.144419 0.580196          | H 1.205735 -3.083696 -0.207780  |
| C 1.469150 -0.297350 -1.098440         | C -0.582550 -0.954332 -1.993244 |
| H 0.688785 -0.558214 -1.845701         | H -1.458732 -1.612045 -2.201681 |
| H 2.459567 -0.374380 -1.600362         | H 0.051642 -0.928225 -2.907898  |
| C 1.270913 1.120984 -0.614407          | C -1.024400 0.455231 -1.670075  |
| H 1.126942 1.764930 -1.508465          | H -1.746837 0.789259 -2.450610  |
| H 2.164831 1.483164 -0.053557          | H -0.157814 1.151038 -1.676906  |
| O 0.128408 1.157716 0.242883           | O -1.642289 0.453321 -0.380097  |
| C -0.276509 2.478623 0.567524          | C -2.268735 1.687768 -0.062772  |
| H -0.610066 3.028194 -0.341083         | H -3.137089 1.879324 -0.734174  |
| H -1.111459 2.398392 1.286446          | H -2.617015 1.625462 0.984275   |
| H 0.553298 3.056388 1.037260           | H -1.562576 2.543854 -0.151419  |
| O -0.084284 -2.468856 2.406797         | O 0.729044 -2.090295 2.017881   |
| C -1.162294 -3.394190 2.487701         | C 0.348097 -3.194657 2.825573   |
| H -0.786531 -4.431234 2.634791         | H 1.126733 -3.991047 2.804230   |
| H -1.845289 -3.140972 3.330932         | H 0.187164 -2.888634 3.885066   |
| H -1.721170 -3.325712 1.538138         | H -0.598187 -3.591720 2.416222  |
| C 0.694464 -2.410271 3.596635          | C 1.928053 -1.457772 2.455995   |
| H 1.103053 -3.415340 3.853642          | H 2.765761 -2.191277 2.509893   |
| H 0.059857 -2.072043 4.449830          | H 1.781601 -1.030604 3.476216   |
| C 1.837559 -1.444954 3.371420          | C 2.281764 -0.368838 1.468826   |
| H 2.531191 -1.827085 2.586108          | H 2.540938 -0.801838 0.474727   |
| H 2.417285 -1.334765 4.317268          | H 3.174234 0.183912 1.844059    |
| O 1.291564 -0.194696 2.964494          | O 1.162493 0.501279 1.344896    |

|   |           |           |           |   |           |           |           |
|---|-----------|-----------|-----------|---|-----------|-----------|-----------|
| C | 2.277762  | 0.820456  | 2.838507  | C | 1.447093  | 1.664685  | 0.574061  |
| H | 2.807470  | 0.983147  | 3.803642  | H | 2.275860  | 2.248942  | 1.036201  |
| H | 3.026129  | 0.559500  | 2.056814  | H | 1.719571  | 1.410865  | -0.472434 |
| H | 1.759763  | 1.753218  | 2.552128  | H | 0.538311  | 2.292429  | 0.568609  |
| O | -1.896571 | -1.238520 | 0.219212  | O | -2.252862 | -2.136094 | 1.227425  |
| C | -1.857877 | -1.661132 | -1.142694 | C | -2.766087 | -2.901953 | 0.148087  |
| H | -1.636485 | -0.812038 | -1.826695 | H | -3.258442 | -2.256687 | -0.614218 |
| H | -1.060540 | -2.421885 | -1.226162 | H | -1.921173 | -3.440994 | -0.317552 |
| H | -2.825755 | -2.127442 | -1.434270 | H | -3.508204 | -3.650221 | 0.509112  |
| C | -2.911424 | -0.274393 | 0.468436  | C | -3.270391 | -1.430740 | 1.932553  |
| H | -3.894418 | -0.623053 | 0.074734  | H | -4.063396 | -2.129779 | 2.286241  |
| H | -2.657289 | 0.683895  | -0.042407 | H | -3.750181 | -0.682392 | 1.258943  |
| C | -3.021710 | -0.076901 | 1.965192  | C | -2.639841 | -0.755212 | 3.127900  |
| H | -3.378051 | -1.013371 | 2.456054  | H | -2.254498 | -1.512993 | 3.850535  |
| H | -3.765071 | 0.725765  | 2.181234  | H | -3.411801 | -0.145849 | 3.652683  |
| O | -1.737509 | 0.274276  | 2.468861  | O | -1.571356 | 0.067286  | 2.668946  |
| C | -1.731364 | 0.525123  | 3.869066  | C | -0.963280 | 0.822736  | 3.707371  |
| H | -2.088513 | -0.364054 | 4.437843  | H | -0.553299 | 0.161331  | 4.505151  |
| H | -0.687329 | 0.742558  | 4.155327  | H | -0.135121 | 1.397998  | 3.256549  |
| H | -2.382687 | 1.391466  | 4.121714  | H | -1.695928 | 1.521715  | 4.171451  |

## DMF

|                                           |                                |
|-------------------------------------------|--------------------------------|
| E (PBE-D3/ma-def2-svp GAS_OPT) =          | -248.0475159115                |
| E (PBE-D3/ma-def2-svp SMD_OPT) =          | -248.0584061985                |
| $\Delta G_{\text{corr}}$ (ID-RR-HR GAS) = | <b>0.0700846500</b>            |
| E (DLPNO-CCSDT/cc-p(wC)VTZ GAS_OPT GAS) = | -248.1260204285                |
| E (DLPNO-CCSDT/cc-p(wC)VTZ GAS_OPT SMD) = | -248.1356854812                |
| E (DLPNO-CCSDT/cc-p(wC)VTZ SMD_OPT SMD) = | -248.1362261054                |
| E (PBE-D3/ma-def2-tzvp GAS_OPT GAS) =     | -248.3148701326                |
| E (PBE-D3/ma-def2-tzvp GAS_OPT SMD) =     | -248.3252689787                |
| E (PBE-D3/ma-def2-tzvp GAS_OPT CPCM) =    | -248.3266359656                |
| GAS_OPT                                   | SMD_OPT                        |
| H -0.789837 2.747682 -4.462181            | H -0.783811 2.751721 -4.449112 |
| O 2.001055 1.589271 -1.426955             | O 2.017420 1.577771 -1.431907  |
| C 1.353416 1.460005 -2.460581             | C 1.350425 1.457828 -2.468564  |

|   |           |          |           |   |           |          |           |
|---|-----------|----------|-----------|---|-----------|----------|-----------|
| H | 1.730626  | 0.875412 | -3.345713 | H | 1.722575  | 0.875647 | -3.353035 |
| N | 0.109009  | 1.988375 | -2.696619 | N | 0.117743  | 1.986898 | -2.690895 |
| C | -0.554945 | 2.778465 | -1.677087 | C | -0.556495 | 2.778654 | -1.678205 |
| H | -1.520606 | 2.313216 | -1.382513 | H | -1.522249 | 2.308784 | -1.393898 |
| H | -0.761379 | 3.806743 | -2.045535 | H | -0.767152 | 3.801144 | -2.058079 |
| H | 0.108505  | 2.833117 | -0.794255 | H | 0.089666  | 2.849372 | -0.784571 |
| C | -0.580150 | 1.781200 | -3.952976 | C | -0.576163 | 1.781222 | -3.949599 |
| H | -1.548640 | 1.255889 | -3.799927 | H | -1.543937 | 1.260385 | -3.786495 |
| H | 0.048891  | 1.163578 | -4.623484 | H | 0.047921  | 1.163527 | -4.623464 |

### (DMF)<sub>4</sub>

|                                           |                                 |
|-------------------------------------------|---------------------------------|
| E (PBE-D3/ma-def2-svp GAS_OPT) =          | -992.2337306912                 |
| E (PBE-D3/ma-def2-svp SMD_OPT) =          | -992.2570285916                 |
| $\Delta G_{\text{corr}}$ (ID-RR-HR GAS) = | <b>0.3430621700</b>             |
| E (DLPNO-CCSDT/cc-p(wC)VTZ GAS_OPT GAS) = | -992.5520271386                 |
| E (DLPNO-CCSDT/cc-p(wC)VTZ GAS_OPT SMD) = | -992.5700594319                 |
| E (DLPNO-CCSDT/cc-p(wC)VTZ SMD_OPT SMD) = | -992.5707507098                 |
| E (PBE-D3/ma-def2-tzvp GAS_OPT GAS) =     | -993.2975435311                 |
| E (PBE-D3/ma-def2-tzvp GAS_OPT SMD) =     | -993.3179122004                 |
| E (PBE-D3/ma-def2-tzvp GAS_OPT CPCM) =    | -993.3213760498                 |
| GAS_OPT                                   | SMD_OPT                         |
| H 1.108407 -1.180395 -2.672012            | H 1.237439 -1.299618 -2.663998  |
| O -0.751353 0.429819 0.192637             | O -0.087417 0.842666 0.151184   |
| C -0.153140 -0.118109 -0.735847           | C 0.318950 0.140985 -0.784675   |
| H 0.878134 0.195675 -1.054482             | H 1.324975 0.298034 -1.256698   |
| N -0.627087 -1.148665 -1.492282           | N -0.358858 -0.887122 -1.359868 |
| C -1.957504 -1.685555 -1.264937           | C -1.680515 -1.260846 -0.888634 |
| H -2.595942 -1.507608 -2.156401           | H -2.374915 -1.361779 -1.746963 |
| H -2.390060 -1.174525 -0.386081           | H -2.044238 -0.471594 -0.207689 |
| H -1.906418 -2.777233 -1.066376           | H -1.650657 -2.229351 -0.343489 |
| C 0.139445 -1.709509 -2.589316            | C 0.232147 -1.690155 -2.415186  |
| H -0.416016 -1.592628 -3.543840           | H -0.400712 -1.662564 -3.326700 |
| H 0.340200 -2.789510 -2.419686            | H 0.337726 -2.748064 -2.091932  |
| H -0.864053 3.017308 -2.300661            | H -0.974975 2.925781 -2.317289  |
| O -2.224220 0.023706 -4.140585            | O -2.308345 -0.058737 -4.191073 |

|   |           |          |           |   |           |           |           |
|---|-----------|----------|-----------|---|-----------|-----------|-----------|
| C | -1.751122 | 0.995661 | -3.536339 | C | -1.841210 | 0.916478  | -3.582333 |
| H | -2.266697 | 1.475671 | -2.667029 | H | -2.357394 | 1.377070  | -2.702534 |
| N | -0.571271 | 1.612175 | -3.833208 | N | -0.677698 | 1.554354  | -3.880581 |
| C | 0.230798  | 1.188271 | -4.966481 | C | 0.158287  | 1.126301  | -4.985871 |
| H | -0.261199 | 0.318700 | -5.439212 | H | -0.299964 | 0.243100  | -5.466046 |
| H | 1.253123  | 0.901788 | -4.636990 | H | 1.175286  | 0.861076  | -4.626131 |
| H | 0.311790  | 2.014532 | -5.704382 | H | 0.257456  | 1.939696  | -5.735689 |
| C | -0.120260 | 2.771667 | -3.082275 | C | -0.236225 | 2.704560  | -3.110597 |
| H | -0.007819 | 3.643799 | -3.760447 | H | -0.133042 | 3.593620  | -3.767771 |
| H | 0.860674  | 2.569497 | -2.598466 | H | 0.751014  | 2.508899  | -2.639688 |
| H | -2.506088 | 1.615529 | 2.293608  | H | -2.918389 | 1.269213  | 2.302032  |
| O | -3.010615 | 3.100369 | -1.130167 | O | -3.069385 | 2.997128  | -1.049348 |
| C | -2.871667 | 2.619808 | 0.000956  | C | -3.036308 | 2.415559  | 0.046427  |
| H | -2.036717 | 2.920960 | 0.682784  | H | -2.314271 | 2.702648  | 0.850925  |
| N | -3.686274 | 1.684665 | 0.562625  | N | -3.840504 | 1.385635  | 0.417341  |
| C | -4.801780 | 1.134067 | -0.182670 | C | -4.859244 | 0.864068  | -0.475519 |
| H | -5.735934 | 1.194142 | 0.414161  | H | -5.870989 | 1.002186  | -0.038054 |
| H | -4.620288 | 0.068506 | -0.443497 | H | -4.706308 | -0.221073 | -0.654878 |
| H | -4.923227 | 1.712471 | -1.116204 | H | -4.807193 | 1.401725  | -1.438968 |
| C | -3.389995 | 1.111693 | 1.860894  | C | -3.754187 | 0.804837  | 1.745406  |
| H | -3.146031 | 0.031858 | 1.769933  | H | -3.576299 | -0.290018 | 1.687437  |
| H | -4.252971 | 1.230178 | 2.550783  | H | -4.695738 | 0.970605  | 2.311751  |
| H | -4.390118 | 2.150778 | -4.906752 | H | -4.437361 | 2.289276  | -4.933328 |
| O | -1.298627 | 4.043238 | -5.965100 | O | -1.411623 | 4.232698  | -6.104215 |
| C | -2.333158 | 3.458617 | -5.634344 | C | -2.405540 | 3.611390  | -5.700725 |
| H | -2.656330 | 2.491641 | -6.106107 | H | -2.751669 | 2.662087  | -6.187856 |
| N | -3.207433 | 3.870196 | -4.670177 | N | -3.198119 | 3.966568  | -4.656123 |
| C | -2.976956 | 5.100734 | -3.932358 | C | -2.936561 | 5.166570  | -3.880802 |
| H | -2.045870 | 5.562618 | -4.308326 | H | -2.000130 | 5.632066  | -4.237123 |
| H | -2.884546 | 4.884522 | -2.847738 | H | -2.841423 | 4.910079  | -2.805578 |
| H | -3.821124 | 5.808055 | -4.084646 | H | -3.768489 | 5.895013  | -3.995962 |
| C | -4.388796 | 3.097636 | -4.333363 | C | -4.373641 | 3.192171  | -4.297110 |
| H | -5.317005 | 3.663906 | -4.568687 | H | -5.298320 | 3.792035  | -4.441393 |
| H | -4.386504 | 2.856035 | -3.249898 | H | -4.317738 | 2.883839  | -3.232581 |

### Li<sup>+</sup>(DMF)<sub>4</sub>

|                                           |                     |
|-------------------------------------------|---------------------|
| E (PBE-D3/ma-def2-svp GAS_OPT) =          | -999.6690542039     |
| E (PBE-D3/ma-def2-svp SMD_OPT) =          | -999.7344970487     |
| $\Delta G_{\text{corr}}$ (ID-RR-HR GAS) = | <b>0.3444332400</b> |
| E (DLPNO-CCSDT/cc-p(wC)VTZ GAS_OPT GAS) = | -1000.0057375926    |
| E (DLPNO-CCSDT/cc-p(wC)VTZ GAS_OPT SMD) = | -1000.0709323329    |
| E (DLPNO-CCSDT/cc-p(wC)VTZ SMD_OPT SMD) = | -1000.0722542146    |

|                                        |                                 |
|----------------------------------------|---------------------------------|
| E (PBE-D3/ma-def2-tzvp GAS_OPT GAS) =  | -1000.7371609942                |
| E (PBE-D3/ma-def2-tzvp GAS_OPT SMD) =  | -1000.8001751533                |
| E (PBE-D3/ma-def2-tzvp GAS_OPT CPCM) = | -1000.7990051739                |
| GAS_OPT                                | SMD_OPT                         |
| Li -0.241261 0.062903 0.050157         | Li -0.151080 0.222746 1.072496  |
| H 1.289674 3.375498 -4.631327          | H -0.525722 1.406226 -3.939175  |
| O 0.757116 0.414514 -1.595360          | O 0.580948 1.376132 -0.327568   |
| C 1.008713 1.547438 -2.043229          | C 0.223766 1.402623 -1.524529   |
| H 0.778922 2.471216 -1.455385          | H -0.479458 0.640074 -1.937739  |
| N 1.571645 1.796744 -3.246871          | N 0.623012 2.316138 -2.429029   |
| C 1.927176 0.708718 -4.145826          | C 1.530746 3.393615 -2.069319   |
| H 1.644103 -0.248727 -3.674046         | H 1.791249 3.310290 -0.999387   |
| H 3.018459 0.714858 -4.349196          | H 1.050825 4.376989 -2.255156   |
| H 1.391156 0.816411 -5.111609          | H 2.456792 3.335678 -2.678402   |
| C 1.840575 3.154685 -3.693159          | C 0.161099 2.262994 -3.806730   |
| H 2.924956 3.297790 -3.883398          | H 1.019723 2.143653 -4.500017   |
| H 1.520013 3.874674 -2.916935          | H -0.376798 3.196978 -4.071791  |
| H 4.260499 -2.464613 -0.057093         | H 1.680370 -4.753976 1.073093   |
| O 0.763286 -1.380477 0.890835          | O 1.139994 -1.086341 1.785707   |
| C 1.915757 -1.741284 0.591192          | C 1.366279 -2.285690 1.530155   |
| H 2.454083 -1.304496 -0.286673         | H 1.348924 -3.064798 2.331622   |
| N 2.631985 -2.671829 1.260151          | N 1.647654 -2.791938 0.310617   |
| C 2.084191 -3.335021 2.434644          | C 1.779441 -1.940109 -0.860468  |
| H 2.741013 -3.165456 3.312748          | H 1.729343 -0.881162 -0.554666  |
| H 2.006992 -4.428839 2.261570          | H 0.971658 -2.147506 -1.592974  |
| H 1.081432 -2.921313 2.641271          | H 2.752292 -2.134193 -1.356718  |
| C 3.974144 -3.043893 0.840725          | C 1.834830 -4.220873 0.116326   |
| H 4.022657 -4.125535 0.595459          | H 2.859086 -4.434797 -0.253841  |
| H 4.708475 -2.835684 1.646791          | H 1.109249 -4.607956 -0.629242  |
| H -3.239477 3.309684 2.705842          | H -1.461101 4.079196 4.926847   |
| O -0.242142 1.780343 0.979608          | O -0.929772 1.255071 2.484681   |
| C -1.219551 2.290134 1.556013          | C -1.091365 2.212067 3.265853   |
| H -2.241880 1.843237 1.475199          | H -1.797146 2.138439 4.129098   |
| N -1.172697 3.404699 2.319613          | N -0.476684 3.409711 3.190462   |
| C 0.082319 4.108283 2.539297           | C 0.478010 3.718395 2.137544    |
| H 0.889305 3.567771 2.013905           | H 0.511214 2.892504 1.404991    |
| H 0.313965 4.152720 3.623735           | H 1.491171 3.870342 2.566646    |
| H 0.017157 5.146955 2.152967           | H 0.177514 4.652168 1.618577    |
| C -2.366152 3.941374 2.954588          | C -0.726857 4.442556 4.183580   |
| H -2.565488 4.975876 2.604435          | H -1.128855 5.357108 3.699804   |
| H -2.246893 3.963450 4.058086          | H 0.213077 4.709228 4.710682    |
| H -5.151931 -2.414716 -1.061703        | H -3.175248 -4.716988 -0.715710 |
| O -2.113335 -0.371205 -0.135911        | O -1.369701 -0.952758 0.053714  |
| C -3.098144 -1.068084 -0.427306        | C -1.561425 -2.176105 0.205001  |
| H -4.055545 -0.602422 -0.772361        | H -1.474812 -2.666984 1.205600  |
| N -3.161682 -2.417459 -0.369471        | N -1.883517 -3.039941 -0.779012 |
| C -2.023360 -3.214319 0.065705         | C -2.067444 -2.594045 -2.150809 |
| H -2.319557 -3.862446 0.916346         | H -1.826604 -1.518740 -2.221046 |
| H -1.199918 -2.549692 0.382527         | H -3.118923 -2.752350 -2.470538 |

|   |           |           |           |   |           |           |           |
|---|-----------|-----------|-----------|---|-----------|-----------|-----------|
| H | -1.671343 | -3.865867 | -0.761836 | H | -1.406698 | -3.167117 | -2.833165 |
| C | -4.369754 | -3.133261 | -0.752542 | C | -2.120953 | -4.446745 | -0.495998 |
| H | -4.754848 | -3.733316 | 0.098146  | H | -1.915717 | -4.655059 | 0.570776  |
| H | -4.164812 | -3.820019 | -1.600320 | H | -1.462381 | -5.084752 | -1.120847 |

## Li<sup>+</sup> in DMF

|                                           |                               |
|-------------------------------------------|-------------------------------|
| E (PBE-D3/ma-def2-svp GAS_OPT) =          | -7.2519251623                 |
| E (PBE-D3/ma-def2-svp SMD_OPT) =          | -7.3917970144                 |
| $\Delta G_{\text{corr}}$ (ID-RR-HR GAS) = | -0.0127326619                 |
| E (DLPNO-CCSDT/cc-p(wC)VTZ GAS_OPT GAS) = | -7.2736440090                 |
| E (DLPNO-CCSDT/cc-p(wC)VTZ GAS_OPT SMD) = | -7.4150889774                 |
| E (DLPNO-CCSDT/cc-p(wC)VTZ SMD_OPT SMD) = | -7.4150889774                 |
| E (PBE-D3/ma-def2-tzvp GAS_OPT GAS) =     | -7.2566456293                 |
| E (PBE-D3/ma-def2-tzvp GAS_OPT SMD) =     | -7.3963804330                 |
| E (PBE-D3/ma-def2-tzvp GAS_OPT CPCM) =    | -7.4401640391                 |
| GAS_OPT                                   | SMD_OPT                       |
| Li 0.000000 0.000000 0.000000             | Li 0.000000 0.000000 0.000000 |

## (DMF)<sub>5</sub>

|                                           |                     |
|-------------------------------------------|---------------------|
| E (PBE-D3/ma-def2-svp GAS_OPT) =          | -1240.2974060660    |
| E (PBE-D3/ma-def2-svp SMD_OPT) =          | -1240.3239013672    |
| $\Delta G_{\text{corr}}$ (ID-RR-HR GAS) = | <b>0.4353376200</b> |
| E (DLPNO-CCSDT/cc-p(wC)VTZ GAS_OPT GAS) = | -1240.6944901651    |

|                                           |                                 |
|-------------------------------------------|---------------------------------|
| E (DLPNO-CCSDT/cc-p(wC)VTZ GAS_OPT SMD) = | -1240.7131902924                |
| E (DLPNO-CCSDT/cc-p(wC)VTZ SMD_OPT SMD) = | -1240.7152610060                |
| E (PBE-D3/ma-def2-tzvp GAS_OPT GAS) =     | -1241.6266571738                |
| E (PBE-D3/ma-def2-tzvp GAS_OPT SMD) =     | -1241.6464485680                |
| E (PBE-D3/ma-def2-tzvp GAS_OPT CPCM) =    | -1241.6508558572                |
| <b>GAS_OPT</b>                            | <b>SMD_OPT</b>                  |
| H 0.211764 4.862966 -1.877429             | Li -2.148080 1.984135 -0.455481 |
| O 2.777315 1.908524 -0.145675             | H 0.527577 3.283310 -4.609499   |
| C 1.781443 2.319262 -0.755336             | O -1.473863 3.523555 -1.416263  |
| H 0.788204 1.803117 -0.718559             | C -0.814575 3.464566 -2.475298  |
| N 1.745711 3.441308 -1.533612             | H -0.544408 2.486238 -2.942734  |
| C 2.934643 4.249209 -1.724657             | N -0.360469 4.528829 -3.165321  |
| H 3.763328 3.792675 -1.152649             | C -0.612959 5.888463 -2.717049  |
| H 2.767479 5.288512 -1.367445             | H -1.170164 6.451488 -3.494599  |
| H 3.210991 4.293658 -2.800229             | H 0.345349 6.414575 -2.524175   |
| C 0.521215 3.845240 -2.202184             | H -1.208443 5.861575 -1.787483  |
| H -0.285032 3.126702 -1.955676            | C 0.402804 4.360368 -4.391250   |
| H 0.661770 3.867447 -3.305230             | H 1.406512 4.823537 -4.290225   |
| H 2.010961 -0.328106 0.140214             | H -0.120517 4.840513 -5.244446  |
| O 1.390586 -1.703929 -3.339994            | H -3.389357 -2.011480 -3.420407 |
| C 1.574220 -1.268715 -2.198509            | O -1.386150 0.367961 -1.275994  |
| H 1.894341 -0.211523 -2.003604            | C -2.036999 -0.431368 -1.980839 |
| N 1.422124 -1.974103 -1.041851            | H -2.966043 -0.119820 -2.516596 |
| C 1.035856 -3.374786 -1.071890            | N -1.719647 -1.727163 -2.172023 |
| H 0.972616 -3.697587 -2.127052            | C -0.542557 -2.317756 -1.556147 |
| H 0.054232 -3.521039 -0.574514            | H 0.183543 -2.633899 -2.334279  |
| H 1.799076 -3.991720 -0.548828            | H -0.827665 -3.213682 -0.967399 |
| C 1.594790 -1.347987 0.258874             | H -0.063369 -1.574783 -0.894849 |
| H 2.306802 -1.939272 0.875129             | C -2.532639 -2.584737 -3.019295 |
| H 0.630165 -1.280875 0.805053             | H -2.919423 -3.449434 -2.440650 |
| H -1.077499 -2.416285 -3.195901           | H -1.934059 -2.972929 -3.869534 |
| O -1.335771 1.273109 -1.067591            | H -6.405212 1.616328 2.401241   |
| C -1.592466 0.077494 -1.292643            | O -4.086905 1.664335 -0.580681  |
| H -1.810093 -0.648182 -0.469480           | C -4.854819 1.624867 0.401933   |
| N -1.630106 -0.498312 -2.520671           | H -4.736152 2.319466 1.268716   |
| C -1.331536 0.264652 -3.720513            | N -5.886638 0.768996 0.546738   |
| H -1.167053 1.320015 -3.439277            | C -6.203606 -0.214639 -0.475987 |
| H -2.179376 0.203752 -4.435574            | H -6.250183 -1.229412 -0.030550 |
| H -0.419175 -0.140624 -4.207014           | H -5.425644 -0.189777 -1.259479 |
| C -1.926229 -1.913099 -2.687518           | H -7.189687 0.007374 -0.935560  |
| H -2.839699 -2.045436 -3.307030           | C -6.729148 0.796756 1.732556   |
| H -2.088318 -2.382788 -1.698356           | H -6.650825 -0.163074 2.283895  |
| H -0.041969 3.946487 2.907729             | H -7.788768 0.966109 1.450415   |
| O -1.076429 -0.114107 2.242767            | H -0.319915 0.361462 5.118762   |
| C -1.038678 1.097452 2.002687             | O -1.827430 1.884527 1.459276   |
| H -1.890425 1.639921 1.520678             | C -1.182893 1.094273 2.177875   |

|   |           |           |          |   |           |           |          |
|---|-----------|-----------|----------|---|-----------|-----------|----------|
| N | 0.014048  | 1.922268  | 2.269186 | H | -0.231569 | 0.621743  | 1.829567 |
| C | 1.232773  | 1.411007  | 2.874651 | N | -1.534925 | 0.721630  | 3.424537 |
| H | 1.088897  | 0.335908  | 3.085853 | C | -2.748819 | 1.223730  | 4.048937 |
| H | 1.447789  | 1.945513  | 3.824924 | H | -3.429307 | 0.384581  | 4.300253 |
| H | 2.090972  | 1.540330  | 2.181691 | H | -3.259374 | 1.907607  | 3.348555 |
| C | -0.051295 | 3.340039  | 1.974842 | H | -2.501921 | 1.772491  | 4.981405 |
| H | -0.980916 | 3.557827  | 1.414862 | C | -0.693392 | -0.162666 | 4.214161 |
| H | 0.813035  | 3.652686  | 1.352915 | H | 0.175331  | -0.491118 | 3.613548 |
| H | -2.309881 | -3.207527 | 4.811254 | H | -1.264583 | -1.055023 | 4.542768 |
| O | -2.009956 | -3.138709 | 0.478624 | H | -0.751851 | -2.564168 | 2.034587 |
| C | -2.407717 | -2.787776 | 1.593764 | O | -4.744296 | -1.802875 | 3.477083 |
| H | -3.371887 | -2.233147 | 1.738274 | C | -3.675827 | -2.419787 | 3.364773 |
| N | -1.773931 | -3.027723 | 2.774084 | H | -3.283657 | -3.088913 | 4.175134 |
| C | -0.462458 | -3.645760 | 2.789264 | N | -2.846237 | -2.374680 | 2.288718 |
| H | -0.268525 | -4.090245 | 1.796777 | C | -3.189221 | -1.577614 | 1.124714 |
| H | -0.417881 | -4.437609 | 3.565552 | H | -2.302468 | -1.020173 | 0.769038 |
| H | 0.324460  | -2.890348 | 3.005655 | H | -3.981572 | -0.863056 | 1.405536 |
| C | -2.248251 | -2.440091 | 4.010881 | H | -3.556797 | -2.218785 | 0.293986 |
| H | -3.255551 | -2.009936 | 3.853018 | C | -1.649482 | -3.192420 | 2.216351 |
| H | -1.573506 | -1.619733 | 4.337288 | H | -1.726611 | -3.936437 | 1.394595 |
|   |           |           |          | H | -1.510464 | -3.739139 | 3.168333 |

## Li<sup>+</sup>(DMF)<sub>5</sub>

|                                           |                                 |
|-------------------------------------------|---------------------------------|
| E (PBE-D3/ma-def2-svp GAS_OPT) =          | -1247.7333543943                |
| E (PBE-D3/ma-def2-svp SMD_OPT) =          | -1247.8035333343                |
| $\Delta G_{\text{corr}}$ (ID-RR-HR GAS) = | <b>0.4336469900</b>             |
| E (DLPNO-CCSDT/cc-p(wC)VTZ GAS_OPT GAS) = | -1248.1493216593                |
| E (DLPNO-CCSDT/cc-p(wC)VTZ GAS_OPT SMD) = | -1248.2128851299                |
| E (DLPNO-CCSDT/cc-p(wC)VTZ SMD_OPT SMD) = | -1248.2191775468                |
| E (PBE-D3/ma-def2-tzvp GAS_OPT GAS) =     | -1249.0679870866                |
| E (PBE-D3/ma-def2-tzvp GAS_OPT SMD) =     | -1249.1290669326                |
| E (PBE-D3/ma-def2-tzvp GAS_OPT CPCM) =    | -1249.1300283377                |
| GAS_OPT                                   | SMD_OPT                         |
| Li 0.794781 1.185159 -0.227211            | Li -2.148080 1.984135 -0.455481 |
| H 1.351051 2.884095 -5.034820             | H 0.527577 3.283310 -4.609499   |



|   |           |           |           |   |           |           |           |
|---|-----------|-----------|-----------|---|-----------|-----------|-----------|
| O | 1.761478  | 2.522489  | -1.295129 | O | -1.473863 | 3.523555  | -1.416263 |
| C | 1.639662  | 2.645607  | -2.525316 | C | -0.814575 | 3.464566  | -2.475298 |
| H | 0.870817  | 2.066475  | -3.095825 | H | -0.544408 | 2.486238  | -2.942734 |
| N | 2.389567  | 3.464086  | -3.300020 | N | -0.360469 | 4.528829  | -3.165321 |
| C | 3.443766  | 4.281791  | -2.719602 | C | -0.612959 | 5.888463  | -2.717049 |
| H | 3.499035  | 4.071895  | -1.636768 | H | -1.170164 | 6.451488  | -3.494599 |
| H | 3.232371  | 5.360100  | -2.878890 | H | 0.345349  | 6.414575  | -2.524175 |
| H | 4.420039  | 4.043473  | -3.190620 | H | -1.208443 | 5.861575  | -1.787483 |
| C | 2.175004  | 3.558525  | -4.734547 | C | 0.402804  | 4.360368  | -4.391250 |
| H | 3.091577  | 3.267075  | -5.289353 | H | 1.406512  | 4.823537  | -4.290225 |
| H | 1.907000  | 4.596196  | -5.025298 | H | -0.120517 | 4.840513  | -5.244446 |
| H | 1.277479  | -3.949334 | 1.243413  | H | -3.389357 | -2.011480 | -3.420407 |
| O | 1.834539  | -0.353783 | 0.280904  | O | -1.386150 | 0.367961  | -1.275994 |
| C | 1.662579  | -1.539082 | 0.614912  | C | -2.036999 | -0.431368 | -1.980839 |
| H | 0.645594  | -1.991076 | 0.726857  | H | -2.966043 | -0.119820 | -2.516596 |
| N | 2.662616  | -2.414198 | 0.878111  | N | -1.719647 | -1.727163 | -2.172023 |
| C | 4.056393  | -2.009269 | 0.792416  | C | -0.542557 | -2.317756 | -1.556147 |
| H | 4.097191  | -0.942247 | 0.509705  | H | 0.183543  | -2.633899 | -2.334279 |
| H | 4.590825  | -2.614140 | 0.030053  | H | -0.827665 | -3.213682 | -0.967399 |
| H | 4.562387  | -2.152470 | 1.770081  | H | -0.063369 | -1.574783 | -0.894849 |
| C | 2.372489  | -3.789633 | 1.248973  | C | -2.532639 | -2.584737 | -3.019295 |
| H | 2.767153  | -4.017220 | 2.262076  | H | -2.919423 | -3.449434 | -2.440650 |
| H | 2.838464  | -4.495670 | 0.529440  | H | -1.934059 | -2.972929 | -3.869534 |
| H | -2.693621 | -2.537233 | -1.227423 | H | -6.405212 | 1.616328  | 2.401241  |
| O | -0.631495 | 0.604677  | -1.448512 | O | -4.086905 | 1.664335  | -0.580681 |
| C | -1.335004 | -0.419998 | -1.376401 | C | -4.854819 | 1.624867  | 0.401933  |
| H | -1.195186 | -1.189519 | -0.578355 | H | -4.736152 | 2.319466  | 1.268716  |
| N | -2.338540 | -0.727539 | -2.231910 | N | -5.886638 | 0.768996  | 0.546738  |
| C | -2.690765 | 0.159111  | -3.328373 | C | -6.203606 | -0.214639 | -0.475987 |
| H | -2.058934 | 1.063140  | -3.269920 | H | -6.250183 | -1.229412 | -0.030550 |
| H | -3.759067 | 0.452207  | -3.259541 | H | -5.425644 | -0.189777 | -1.259479 |
| H | -2.528864 | -0.343373 | -4.305424 | H | -7.189687 | 0.007374  | -0.935560 |
| C | -3.094059 | -1.962000 | -2.083962 | C | -6.729148 | 0.796756  | 1.732556  |
| H | -3.011718 | -2.581518 | -3.002021 | H | -6.650825 | -0.163074 | 2.283895  |
| H | -4.169234 | -1.745080 | -1.908099 | H | -7.788768 | 0.966109  | 1.450415  |
| H | -0.330580 | 6.115437  | 2.947097  | H | -0.319915 | 0.361462  | 5.118762  |
| O | 0.182516  | 2.195875  | 1.322948  | O | -1.827430 | 1.884527  | 1.459276  |
| C | 0.509626  | 3.366222  | 1.577260  | C | -1.182893 | 1.094273  | 2.177875  |
| H | 1.180312  | 3.947954  | 0.895931  | H | -0.231569 | 0.621743  | 1.829567  |
| N | 0.112015  | 4.061907  | 2.669039  | N | -1.534925 | 0.721630  | 3.424537  |
| C | -0.762168 | 3.455206  | 3.660650  | C | -2.748819 | 1.223730  | 4.048937  |
| H | -0.995581 | 2.424167  | 3.340905  | H | -3.429307 | 0.384581  | 4.300253  |
| H | -1.703564 | 4.036054  | 3.754395  | H | -3.259374 | 1.907607  | 3.348555  |
| H | -0.264843 | 3.431215  | 4.652955  | H | -2.501921 | 1.772491  | 4.981405  |
| C | 0.542586  | 5.431255  | 2.895528  | C | -0.693392 | -0.162666 | 4.214161  |
| H | 1.199082  | 5.758883  | 2.067476  | H | 0.175331  | -0.491118 | 3.613548  |
| H | 1.106887  | 5.514398  | 3.848334  | H | -1.264583 | -1.055023 | 4.542768  |
| H | -4.655476 | -4.687235 | 2.959718  | H | -0.751851 | -2.564168 | 2.034587  |
| O | -1.345771 | -3.077699 | 0.781675  | O | -4.744296 | -1.802875 | 3.477083  |
| C | -2.016380 | -3.334123 | 1.791780  | C | -3.675827 | -2.419787 | 3.364773  |
| H | -2.026956 | -2.657964 | 2.686731  | H | -3.283657 | -3.088913 | 4.175134  |
| N | -2.805070 | -4.427415 | 1.958212  | N | -2.846237 | -2.374680 | 2.288718  |
| C | -2.917930 | -5.429973 | 0.910359  | C | -3.189221 | -1.577614 | 1.124714  |
| H | -2.247309 | -5.150904 | 0.078002  | H | -2.302468 | -1.020173 | 0.769038  |
| H | -3.962604 | -5.492360 | 0.538611  | H | -3.981572 | -0.863056 | 1.405536  |

|   |           |           |          |   |           |           |          |
|---|-----------|-----------|----------|---|-----------|-----------|----------|
| H | -2.626270 | -6.428378 | 1.297551 | H | -3.556797 | -2.218785 | 0.293986 |
| C | -3.567670 | -4.638352 | 3.177681 | C | -1.649482 | -3.192420 | 2.216351 |
| H | -3.387008 | -3.803851 | 3.881618 | H | -1.726611 | -3.936437 | 1.394595 |
| H | -3.268778 | -5.587115 | 3.671280 | H | -1.510464 | -3.739139 | 3.168333 |

## (DMF)<sub>6</sub>

|                                           |                                 |
|-------------------------------------------|---------------------------------|
| E (PBE-D3/ma-def2-svp GAS_OPT) =          | -1488.3642538444                |
| E (PBE-D3/ma-def2-svp SMD_OPT) =          | -1488.3887889211                |
| $\Delta G_{\text{corr}}$ (ID-RR-HR GAS) = | <b>0.5304941700</b>             |
| E (DLPNO-CCSDT/cc-p(wC)VTZ GAS_OPT GAS) = | -1488.8398073824                |
| E (DLPNO-CCSDT/cc-p(wC)VTZ GAS_OPT SMD) = | -1488.8594609522                |
| E (DLPNO-CCSDT/cc-p(wC)VTZ SMD_OPT SMD) = | -1488.8618975566                |
| E (PBE-D3/ma-def2-tzvp GAS_OPT GAS) =     | -1489.9586201319                |
| E (PBE-D3/ma-def2-tzvp GAS_OPT SMD) =     | -1489.9771403817                |
| E (PBE-D3/ma-def2-tzvp GAS_OPT CPCM) =    | -1489.9842294831                |
| <b>GAS_OPT</b>                            | <b>SMD_OPT</b>                  |
| H 0.241785 1.869890 -3.631963             | H 1.710180 -1.812161 -5.609057  |
| O 3.194570 0.617759 -1.650449             | O -1.485722 -2.484101 -3.718943 |
| C 2.242169 1.043343 -2.317456             | C -0.420719 -2.263812 -4.313652 |
| H 1.542898 0.370717 -2.879411             | H -0.393195 -1.784807 -5.327919 |
| N 1.911093 2.359491 -2.454396             | N 0.824504 -2.552224 -3.853684  |
| C 2.696793 3.398130 -1.808581             | C 1.020937 -3.168147 -2.553934  |
| H 3.597062 2.930383 -1.369525             | H 0.043678 -3.270806 -2.053114  |
| H 2.114065 3.888569 -1.000203             | H 1.691279 -2.548168 -1.923098  |
| H 3.006161 4.161648 -2.553554             | H 1.484396 -4.172370 -2.660781  |
| C 0.767505 2.766355 -3.249446             | C 2.010411 -2.244842 -4.635289  |
| H 1.085244 3.396476 -4.109000             | H 2.601695 -3.165604 -4.826105  |
| H 0.059071 3.361718 -2.633814             | H 2.648526 -1.508399 -4.101384  |
| H 3.339866 -1.874479 1.379115             | H -2.001415 0.143207 -0.399285  |
| O 0.330610 -3.196400 -0.464223            | O 0.187829 -2.597029 1.039521   |
| C 1.334399 -2.763469 0.122909             | C -0.543853 -1.718602 0.559286  |
| H 1.326160 -2.525342 1.217554             | H -0.302782 -0.626746 0.648014  |
| N 2.538732 -2.510004 -0.453134            | N -1.699737 -1.927574 -0.119686 |
| C 2.757620 -2.715071 -1.874623            | C -2.204244 -3.267184 -0.362795 |
| H 1.819933 -3.083041 -2.328230            | H -2.276151 -3.451282 -1.455246 |

|   |           |           |           |   |           |           |           |
|---|-----------|-----------|-----------|---|-----------|-----------|-----------|
| H | 3.559157  | -3.467420 | -2.038751 | H | -3.215710 | -3.388325 | 0.079928  |
| H | 3.063331  | -1.758012 | -2.344973 | H | -1.518644 | -4.003774 | 0.092780  |
| C | 3.649532  | -1.983513 | 0.322037  | C | -2.469148 | -0.823686 | -0.667093 |
| H | 3.954079  | -0.993963 | -0.076687 | H | -3.504389 | -0.837090 | -0.265496 |
| H | 4.518697  | -2.675347 | 0.278137  | H | -2.519493 | -0.905393 | -1.773681 |
| H | -1.877240 | -2.698311 | -0.969799 | H | 0.176410  | 3.377064  | -2.019012 |
| O | -0.602020 | -0.364023 | -3.638244 | O | 3.254968  | 0.468571  | -2.838623 |
| C | -1.050064 | -1.167199 | -2.807222 | C | 2.702909  | 1.578821  | -2.872978 |
| H | -0.423552 | -1.960896 | -2.326596 | H | 3.287026  | 2.529676  | -2.986494 |
| N | -2.333705 | -1.182255 | -2.348352 | N | 1.369061  | 1.808877  | -2.771919 |
| C | -3.304670 | -0.220778 | -2.832746 | C | 0.417198  | 0.719675  | -2.621334 |
| H | -2.841128 | 0.369758  | -3.644448 | H | 0.964917  | -0.219338 | -2.435652 |
| H | -3.626325 | 0.461220  | -2.015339 | H | -0.193014 | 0.600116  | -3.542566 |
| H | -4.205997 | -0.739945 | -3.222284 | H | -0.261531 | 0.938181  | -1.774362 |
| C | -2.744322 | -2.086563 | -1.285552 | C | 0.822252  | 3.150449  | -2.892016 |
| H | -3.563647 | -2.754489 | -1.630432 | H | 0.209647  | 3.244971  | -3.814993 |
| H | -3.101361 | -1.503744 | -0.410147 | H | 1.646796  | 3.887286  | -2.939111 |
| H | -1.229633 | 3.988782  | -0.002810 | H | -1.682337 | 2.824646  | 3.539873  |
| O | -3.142761 | 0.350702  | 1.251261  | O | -1.156543 | 2.393564  | -0.169546 |
| C | -3.086025 | 1.528256  | 0.876818  | C | -1.310666 | 2.550824  | 1.054670  |
| H | -3.873118 | 2.280100  | 1.156133  | H | -1.817433 | 1.783450  | 1.693246  |
| N | -2.107724 | 2.073825  | 0.108185  | N | -0.921490 | 3.642067  | 1.760546  |
| C | -0.982619 | 1.277646  | -0.361365 | C | -0.263782 | 4.765254  | 1.119998  |
| H | -1.007512 | 0.290315  | 0.131932  | H | 0.741326  | 4.937047  | 1.560459  |
| H | -0.036883 | 1.800133  | -0.123212 | H | -0.859742 | 5.693360  | 1.252230  |
| H | -1.035445 | 1.133888  | -1.458755 | H | -0.156785 | 4.555155  | 0.040890  |
| C | -2.155650 | 3.463344  | -0.316737 | C | -1.150762 | 3.729620  | 3.191578  |
| H | -3.031723 | 3.962088  | 0.141150  | H | -1.768974 | 4.620219  | 3.433908  |
| H | -2.251157 | 3.531476  | -1.422461 | H | -0.189681 | 3.806236  | 3.741203  |
| H | 0.695264  | 2.226390  | 4.563879  | H | 0.055478  | -1.197109 | 4.719667  |
| O | 0.861497  | 3.672431  | 1.075228  | O | -2.952468 | 0.144442  | 2.884112  |
| C | 0.853022  | 3.196893  | 2.217906  | C | -1.957371 | -0.322357 | 3.462105  |
| H | 0.324457  | 3.705958  | 3.068983  | H | -1.125883 | 0.325588  | 3.841732  |
| N | 1.441399  | 2.036084  | 2.606706  | N | -1.727737 | -1.638364 | 3.701861  |
| C | 2.192935  | 1.215233  | 1.668908  | C | -2.659512 | -2.659870 | 3.262039  |
| H | 2.229138  | 1.712841  | 0.685769  | H | -3.437888 | -2.191613 | 2.633460  |
| H | 1.717701  | 0.218790  | 1.569727  | H | -3.143048 | -3.155073 | 4.131739  |
| H | 3.232292  | 1.072084  | 2.033563  | H | -2.124131 | -3.433906 | 2.675658  |
| C | 1.352728  | 1.556002  | 3.977236  | C | -0.538849 | -2.077719 | 4.410114  |
| H | 2.357756  | 1.542135  | 4.453212  | H | 0.084314  | -2.724805 | 3.757705  |
| H | 0.940095  | 0.525178  | 3.987546  | H | -0.815503 | -2.652437 | 5.319684  |
| H | -3.116753 | -3.404228 | 1.395104  | H | 2.262701  | -0.260331 | -0.534239 |
| O | 0.313394  | -1.455796 | 3.033702  | O | 1.162276  | 1.163549  | 3.400108  |
| C | -0.899232 | -1.593801 | 2.810395  | C | 1.596990  | 0.359685  | 2.562002  |
| H | -1.598041 | -0.725868 | 2.707617  | H | 1.577172  | -0.748632 | 2.727083  |
| N | -1.532295 | -2.786973 | 2.648429  | N | 2.141452  | 0.679511  | 1.358887  |
| C | -0.794426 | -4.036805 | 2.699313  | C | 2.267569  | 2.061691  | 0.931261  |
| H | 0.208639  | -3.838802 | 3.119049  | H | 1.625446  | 2.259914  | 0.048576  |
| H | -0.681217 | -4.463105 | 1.678976  | H | 3.320536  | 2.286383  | 0.660295  |
| H | -1.326410 | -4.766666 | 3.344137  | H | 1.955404  | 2.720725  | 1.760569  |
| C | -2.950405 | -2.851744 | 2.344419  | C | 2.684410  | -0.347766 | 0.486064  |
| H | -3.353442 | -1.828192 | 2.228868  | H | 2.432336  | -1.346888 | 0.887713  |
| H | -3.504348 | -3.379794 | 3.151016  | H | 3.788306  | -0.251489 | 0.402526  |

**Li<sup>+</sup>(DMF)<sub>6</sub>**

|                                           |                                |
|-------------------------------------------|--------------------------------|
| E (PBE-D3/ma-def2-svp GAS_OPT) =          | -1495.8062663450               |
| E (PBE-D3/ma-def2-svp SMD_OPT) =          | -1495.8727190791               |
| $\Delta G_{\text{corr}}$ (ID-RR-HR GAS) = | <b>0.5314964500</b>            |
| E (DLPNO-CCSDT/cc-p(wC)VTZ GAS_OPT GAS) = | -1496.3008727727               |
| E (DLPNO-CCSDT/cc-p(wC)VTZ GAS_OPT SMD) = | -1496.3655638450               |
| E (DLPNO-CCSDT/cc-p(wC)VTZ SMD_OPT SMD) = | -1496.3685913342               |
| E (PBE-D3/ma-def2-tzvp GAS_OPT GAS) =     | -1497.4036698883               |
| E (PBE-D3/ma-def2-tzvp GAS_OPT SMD) =     | -1497.4672903903               |
| E (PBE-D3/ma-def2-tzvp GAS_OPT CPCM) =    | -1497.4662445481               |
| <b>GAS_OPT</b>                            | <b>SMD_OPT</b>                 |
| Li 1.244388 0.320435 -1.654907            | Li 1.327935 0.215548 -1.525172 |
| H 3.806560 2.068413 -5.711476             | H 3.390016 1.387523 -6.035581  |
| O 2.226517 -0.275357 -3.202683            | O 2.342493 -0.566905 -2.978600 |
| C 2.750413 0.486528 -4.033249             | C 2.695784 0.062781 -3.996985  |
| H 2.663219 1.597931 -3.941322             | H 2.497610 1.157090 -4.104424  |
| N 3.463546 0.082178 -5.109713             | N 3.336790 -0.472828 -5.054857 |
| C 3.674759 -1.332533 -5.375817            | C 3.680430 -1.884539 -5.098493 |
| H 3.178040 -1.918787 -4.582629            | H 3.342899 -2.371250 -4.166409 |
| H 4.759831 -1.566511 -5.384346            | H 4.778515 -2.009802 -5.201699 |
| H 3.248820 -1.608624 -6.363094            | H 3.190295 -2.373393 -5.966354 |
| C 4.045059 1.038399 -6.037047             | C 3.710486 0.341671 -6.199617  |
| H 3.642407 0.888207 -7.060944             | H 3.226606 -0.040024 -7.122979 |
| H 5.149063 0.926116 -6.076905             | H 4.810566 0.323579 -6.347578  |
| H -0.017119 -1.622414 3.035870            | H 0.383157 -1.348368 3.437623  |
| O 1.892198 -0.264162 0.089901             | O 2.012142 -0.206678 0.234006  |
| C 1.263926 -0.695924 1.072265             | C 1.464680 -0.549337 1.303038  |
| H 0.224700 -1.097588 0.989017             | H 0.484610 -1.086160 1.324408  |
| N 1.750747 -0.732738 2.336493             | N 1.979986 -0.326985 2.530324  |
| C 3.085231 -0.243394 2.642252             | C 3.237406 0.377704 2.714085   |
| H 3.574061 0.063651 1.700722              | H 3.658137 0.636247 1.726684   |
| H 3.687863 -1.039406 3.126542             | H 3.959544 -0.261619 3.263196  |
| H 3.034215 0.624553 3.333439              | H 3.078252 1.306003 3.301974   |
| C 0.948317 -1.254096 3.430295             | C 1.295404 -0.794411 3.724783  |
| H 0.750320 -0.462518 4.184716             | H 1.017841 0.061025 4.375129   |
| H 1.473832 -2.091195 3.936203             | H 1.953755 -1.473259 4.305911  |
| H -4.373127 0.412071 0.421412             | H -4.419445 -0.233139 0.236237 |

|   |           |           |           |   |           |           |           |
|---|-----------|-----------|-----------|---|-----------|-----------|-----------|
| O | -0.674306 | -0.073476 | -1.591447 | O | -0.581563 | -0.175149 | -1.606587 |
| C | -1.578673 | 0.574719  | -1.032569 | C | -1.494446 | 0.230315  | -0.857282 |
| H | -1.367497 | 1.481970  | -0.413729 | H | -1.290833 | 0.761426  | 0.105761  |
| N | -2.892595 | 0.258130  | -1.083551 | N | -2.813386 | 0.087233  | -1.110526 |
| C | -3.352009 | -0.916922 | -1.805214 | C | -3.289150 | -0.556030 | -2.322719 |
| H | -2.512219 | -1.319871 | -2.398251 | H | -2.427552 | -0.954352 | -2.886036 |
| H | -4.187462 | -0.646198 | -2.482317 | H | -3.834903 | 0.172909  | -2.958838 |
| H | -3.707583 | -1.694394 | -1.096113 | H | -3.986993 | -1.381557 | -2.073173 |
| C | -3.882045 | 1.035662  | -0.356192 | C | -3.811627 | 0.596342  | -0.183930 |
| H | -4.665618 | 1.414859  | -1.044643 | H | -4.496598 | 1.298704  | -0.703146 |
| H | -3.390218 | 1.893835  | 0.138174  | H | -3.310108 | 1.132113  | 0.643009  |
| H | -1.964163 | -0.773789 | 5.028201  | H | -1.299167 | -0.824271 | 5.701258  |
| O | -1.224213 | 2.077963  | 1.898671  | O | -1.530041 | 1.674535  | 2.234465  |
| C | -1.690419 | 1.049319  | 2.409249  | C | -1.787540 | 0.687636  | 2.946314  |
| H | -1.890950 | 0.121018  | 1.816640  | H | -2.016985 | -0.316769 | 2.506895  |
| N | -2.012112 | 0.893750  | 3.722250  | N | -1.815266 | 0.683677  | 4.302509  |
| C | -1.836182 | 1.980462  | 4.669801  | C | -1.520041 | 1.880886  | 5.068393  |
| H | -1.416724 | 2.851369  | 4.134823  | H | -1.259453 | 2.699300  | 4.373514  |
| H | -1.145594 | 1.681094  | 5.486789  | H | -0.668582 | 1.701486  | 5.758673  |
| H | -2.808159 | 2.263492  | 5.126077  | H | -2.399079 | 2.183588  | 5.676132  |
| C | -2.582755 | -0.352523 | 4.206731  | C | -2.141498 | -0.522851 | 5.042143  |
| H | -2.621324 | -1.085669 | 3.377691  | H | -2.354931 | -1.348587 | 4.337522  |
| H | -3.609092 | -0.191708 | 4.600819  | H | -3.036655 | -0.362146 | 5.679523  |
| H | -0.325136 | 5.349582  | -0.285902 | H | -1.269848 | 4.664277  | -0.649603 |
| O | 1.323335  | 2.283110  | -1.761048 | O | 1.336449  | 2.182691  | -1.805636 |
| C | 0.815507  | 3.301569  | -1.260722 | C | 0.499216  | 3.017141  | -1.403379 |
| H | 0.166247  | 3.985653  | -1.865131 | H | -0.244700 | 3.479050  | -2.099386 |
| N | 0.969073  | 3.716528  | 0.014834  | N | 0.378027  | 3.459709  | -0.136152 |
| C | 1.791695  | 2.972789  | 0.957734  | C | 1.267857  | 3.002975  | 0.921321  |
| H | 2.326417  | 2.171589  | 0.419280  | H | 2.022408  | 2.322401  | 0.492123  |
| H | 1.144894  | 2.519727  | 1.736925  | H | 0.683393  | 2.468133  | 1.697566  |
| H | 2.520412  | 3.657636  | 1.438158  | H | 1.773174  | 3.872903  | 1.390270  |
| C | 0.238111  | 4.862934  | 0.532795  | C | -0.658822 | 4.409212  | 0.236709  |
| H | 0.938466  | 5.604169  | 0.970221  | H | -0.206814 | 5.339742  | 0.639446  |
| H | -0.475830 | 4.531524  | 1.315190  | H | -1.313446 | 3.965851  | 1.014567  |
| H | -2.020452 | -5.724093 | -1.142799 | H | -1.551313 | -3.386421 | -2.676557 |
| O | -1.814886 | -2.156050 | 1.252020  | O | -1.421454 | -2.316150 | 1.451288  |
| C | -1.973304 | -3.362476 | 1.012381  | C | -1.910343 | -2.816626 | 0.424153  |
| H | -2.643450 | -4.007130 | 1.639870  | H | -3.016915 | -2.846749 | 0.250504  |
| N | -1.391274 | -4.053866 | 0.000388  | N | -1.213567 | -3.391016 | -0.585329 |
| C | -0.482206 | -3.402670 | -0.934040 | C | 0.237354  | -3.462830 | -0.558651 |
| H | -0.620627 | -2.307596 | -0.898025 | H | 0.597341  | -3.247554 | 0.462717  |
| H | -0.693508 | -3.754723 | -1.963529 | H | 0.683704  | -2.728735 | -1.262007 |
| H | 0.576620  | -3.643185 | -0.696924 | H | 0.567136  | -4.479689 | -0.852876 |
| C | -1.591273 | -5.487150 | -0.146875 | C | -1.881451 | -3.921077 | -1.761007 |
| H | -2.286011 | -5.852450 | 0.633008  | H | -2.976566 | -3.806482 | -1.655257 |
| H | -0.628699 | -6.031748 | -0.044691 | H | -1.650318 | -4.999666 | -1.887353 |

## DMSO

E (PBE-D3/ma-def2-svp GAS\_OPT) =

-552.6078871743

|                                           |                                 |
|-------------------------------------------|---------------------------------|
| E (PBE-D3/ma-def2-svp SMD_OPT) =          | -552.6212804088                 |
| $\Delta G_{\text{corr}}$ (ID-RR-HR GAS) = | <b>0.0480126100</b>             |
| E (DLPNO-CCSDT/cc-p(wC)VTZ GAS_OPT GAS) = | -552.5203312602                 |
| E (DLPNO-CCSDT/cc-p(wC)VTZ GAS_OPT SMD) = | -552.5329364308                 |
| E (DLPNO-CCSDT/cc-p(wC)VTZ SMD_OPT SMD) = | -552.5330471425                 |
| E (PBE-D3/ma-def2-tzvp GAS_OPT GAS) =     | -552.9372162962                 |
| E (PBE-D3/ma-def2-tzvp GAS_OPT SMD) =     | -552.9492238183                 |
| E (PBE-D3/ma-def2-tzvp GAS_OPT CPCM) =    | -552.9524468482                 |
| <b>GAS_OPT</b>                            | <b>SMD_OPT</b>                  |
| O 0.713931 -3.064997 -4.214221            | O 0.725478 -3.068289 -4.219531  |
| S 1.110585 -1.831941 -3.402686            | S 1.101017 -1.818449 -3.390307  |
| C -0.070958 -0.495164 -3.852844           | C -0.072177 -0.501231 -3.855099 |
| C 0.478321 -2.092359 -1.694446            | C 0.476615 -2.096601 -1.699059  |
| H 0.101751 0.390609 -3.209694             | H 0.106404 0.384352 -3.212865   |
| H -1.105758 -0.876377 -3.747805           | H -1.110761 -0.870569 -3.741697 |
| H 0.132399 -0.241131 -4.909977            | H 0.133673 -0.241940 -4.911310  |
| H 1.058347 -2.933736 -1.271280            | H 1.059568 -2.935165 -1.272253  |
| H -0.595562 -2.359919 -1.742975           | H -0.600665 -2.353365 -1.737369 |
| H 0.641061 -1.177551 -1.090538            | H 0.644965 -1.181309 -1.096979  |

### (DMSO)<sub>3</sub>

|                                           |                     |
|-------------------------------------------|---------------------|
| E (PBE-D3/ma-def2-svp GAS_OPT) =          | -1657.8645153296    |
| E (PBE-D3/ma-def2-svp SMD_OPT) =          | -1657.8803383988    |
| $\Delta G_{\text{corr}}$ (ID-RR-HR GAS) = | <b>0.1865310700</b> |
| E (DLPNO-CCSDT/cc-p(wC)VTZ GAS_OPT GAS) = | -1657.5974284791    |
| E (DLPNO-CCSDT/cc-p(wC)VTZ GAS_OPT SMD) = | -1657.6149771979    |
| E (DLPNO-CCSDT/cc-p(wC)VTZ SMD_OPT SMD) = | -1657.6155200580    |

|                                        |                                 |
|----------------------------------------|---------------------------------|
| E (PBE-D3/ma-def2-tzvp GAS_OPT GAS) =  | -1658.8407174717                |
| E (PBE-D3/ma-def2-tzvp GAS_OPT SMD) =  | -1658.8542470794                |
| E (PBE-D3/ma-def2-tzvp GAS_OPT CPCM) = | -1658.8624043137                |
| GAS_OPT                                | SMD_OPT                         |
| O 1.982075 0.716842 -0.219025          | O 2.362998 0.430301 0.076553    |
| S 2.427732 2.150582 0.144711           | S 2.592609 1.961783 0.172612    |
| C 0.948106 3.217659 -0.025514          | C 1.049545 2.761403 -0.383490   |
| C 2.525117 2.209053 1.973195           | C 2.448463 2.397128 1.936665    |
| O -0.541385 1.320847 2.068599          | O -0.647232 1.229966 2.216802   |
| S -0.869373 0.095268 1.178126          | S -0.880685 -0.014965 1.315302  |
| C 0.275855 -1.235606 1.677716          | C 0.288655 -1.290800 1.870270   |
| C -2.398182 -0.633625 1.867923         | C -2.414137 -0.802430 1.902655  |
| O -1.502715 -2.260979 -0.748821        | O -1.336106 -2.419665 -0.783016 |
| S -1.369418 -1.327811 -1.968368        | S -1.373809 -1.269286 -1.822492 |
| C 0.416059 -1.126853 -2.296761         | C 0.356047 -0.861592 -2.215695  |
| C -1.755219 -2.374234 -3.426051        | C -1.806649 -2.037208 -3.419257 |
| H 0.664257 3.188556 -1.094250          | H 0.890482 2.465474 -1.438032   |
| H 1.224792 4.251594 0.262034           | H 1.186367 3.859931 -0.325144   |
| H 0.147370 2.806752 0.626612           | H 0.211292 2.431554 0.262405    |
| H 3.344975 1.525637 2.263713           | H 3.298033 1.915767 2.457894    |
| H 1.546730 1.875431 2.379363           | H 1.473292 2.022911 2.313361    |
| H 2.769534 3.244547 2.282804           | H 2.525280 3.498619 2.035475    |
| H 1.270590 -0.910409 1.318832          | H 1.289327 -0.920098 1.573090   |
| H -0.043202 -2.162288 1.163474         | H 0.048488 -2.225649 1.327600   |
| H 0.250072 -1.330042 2.780748          | H 0.205657 -1.417958 2.967715   |
| H -3.199628 0.113323 1.716513          | H -3.243493 -0.101309 1.687725  |
| H -2.254943 -0.826893 2.948587         | H -2.343444 -0.997171 2.990917  |
| H -2.609612 -1.556173 1.293444         | H -2.549127 -1.738098 1.325250  |
| H 0.845697 -0.479754 -1.503522         | H 0.828540 -0.436959 -1.305527  |
| H 0.541192 -0.635729 -3.282534         | H 0.365457 -0.109750 -3.030770  |
| H 0.891457 -2.127642 -2.288580         | H 0.884755 -1.783352 -2.531269  |
| H -2.819679 -2.660577 -3.337475        | H -2.846504 -2.405887 -3.332059 |
| H -1.114005 -3.276877 -3.401641        | H -1.114112 -2.875713 -3.631279 |
| H -1.594250 -1.790602 -4.353853        | H -1.749988 -1.266948 -4.214261 |

### Li<sup>+</sup>(DMSO)<sub>3</sub>

|                                           |                     |
|-------------------------------------------|---------------------|
| E (PBE-D3/ma-def2-svp GAS_OPT) =          | -1665.2879688474    |
| E (PBE-D3/ma-def2-svp SMD_OPT) =          | -1665.3556613467    |
| $\Delta G_{\text{corr}}$ (ID-RR-HR GAS) = | <b>0.1884216000</b> |

|                                           |                                 |
|-------------------------------------------|---------------------------------|
| E (DLPNO-CCSDT/cc-p(wC)VTZ GAS_OPT GAS) = | -1665.0406642053                |
| E (DLPNO-CCSDT/cc-p(wC)VTZ GAS_OPT SMD) = | -1665.1122368574                |
| E (DLPNO-CCSDT/cc-p(wC)VTZ SMD_OPT SMD) = | -1665.1105277461                |
| E (PBE-D3/ma-def2-tzvp GAS_OPT GAS) =     | -1666.2634708505                |
| E (PBE-D3/ma-def2-tzvp GAS_OPT SMD) =     | -1666.3316347308                |
| E (PBE-D3/ma-def2-tzvp GAS_OPT CPCM) =    | -1666.3364273997                |
| <b>GAS_OPT</b>                            | <b>SMD_OPT</b>                  |
| Li -0.265322 0.030769 0.194557            | Li 0.187685 0.495268 -1.575746  |
| O 1.028263 1.010904 -0.726552             | O 0.979816 2.075071 -0.967044   |
| S 1.285069 2.546692 -0.565649             | S 2.350600 2.364357 -0.276885   |
| C 1.411676 2.832216 1.226744              | C 1.940514 3.164047 1.297674    |
| C 3.029441 2.769321 -1.022099             | C 2.930193 0.773489 0.377568    |
| O -1.140396 0.713433 1.685611             | O -1.514582 -0.008492 -0.970879 |
| S -2.299856 0.082933 2.519343             | S -2.607485 0.752367 -0.148789  |
| C -3.574624 -0.381129 1.302131            | C -3.371950 -0.517112 0.890877  |
| C -1.733042 -1.596714 2.942131            | C -1.716132 1.669327 1.137246   |
| O -0.789121 -1.656686 -0.420302           | O 1.247067 -0.956286 -2.159932  |
| S -0.281126 -2.416890 -1.686935           | S 1.014680 -2.471788 -1.853977  |
| C -0.432541 -1.223592 -3.056350           | C 0.689075 -2.571952 -0.069658  |
| C 1.536296 -2.417366 -1.550684            | C -0.657207 -2.855976 -2.446219 |
| H 0.434821 2.533481 1.657666              | H 1.448503 4.125406 1.056303    |
| H 1.598008 3.910262 1.400816              | H 2.887503 3.356297 1.840061    |
| H 2.226461 2.210878 1.646576              | H 1.272241 2.514149 1.894407    |
| H 3.107040 2.566531 -2.106456             | H 3.865897 0.952077 0.944024    |
| H 3.653464 2.060580 -0.444497             | H 3.135150 0.119906 -0.491257   |
| H 3.316105 3.819214 -0.816087             | H 2.154468 0.335246 1.035647    |
| H -3.966056 0.562104 0.877353             | H -4.105751 -0.022867 1.557643  |
| H -4.388199 -0.918697 1.827682            | H -2.592192 -1.041553 1.476342  |
| H -3.110204 -1.012578 0.518676            | H -3.895109 -1.218940 0.214034  |
| H -0.878713 -1.478335 3.634545            | H -1.067690 0.975304 1.706486   |
| H -1.426972 -2.118210 2.013220            | H -2.462262 2.148140 1.802043   |
| H -2.556535 -2.130915 3.455562            | H -1.116892 2.442141 0.620429   |
| H -1.514321 -1.058104 -3.216746           | H 0.393901 -3.611735 0.174523   |
| H 0.014408 -1.667914 -3.967348            | H -0.117385 -1.859056 0.193324  |
| H 0.076905 -0.282033 -2.768841            | H 1.632482 -2.324419 0.452742   |
| H 1.789842 -3.055057 -0.683295            | H -0.635679 -2.767701 -3.549198 |
| H 1.886655 -1.377073 -1.397495            | H -1.373127 -2.135573 -2.003009 |
| H 1.962577 -2.858024 -2.473280            | H -0.896329 -3.899141 -2.158782 |

## Li<sup>+</sup> in DMSO



|                                           |                               |
|-------------------------------------------|-------------------------------|
| E (PBE-D3/ma-def2-svp GAS_OPT) =          | -7.2519251623                 |
| E (PBE-D3/ma-def2-svp SMD_OPT) =          | -7.3917970144                 |
| $\Delta G_{\text{corr}}$ (ID-RR-HR GAS) = | -0.0127326619                 |
| E (DLPNO-CCSDT/cc-p(wC)VTZ GAS_OPT GAS) = | -7.2736440090                 |
| E (DLPNO-CCSDT/cc-p(wC)VTZ GAS_OPT SMD) = | -7.4158901969                 |
| E (DLPNO-CCSDT/cc-p(wC)VTZ SMD_OPT SMD) = | -7.4158901969                 |
| E (PBE-D3/ma-def2-tzvp GAS_OPT GAS) =     | -7.2566456293                 |
| E (PBE-D3/ma-def2-tzvp GAS_OPT SMD) =     | -7.3967595445                 |
| E (PBE-D3/ma-def2-tzvp GAS_OPT CPCM) =    | -7.4410917657                 |
| GAS_OPT                                   | SMD_OPT                       |
| Li 0.000000 0.000000 0.000000             | Li 0.000000 0.000000 0.000000 |

### **(DMSO)<sub>4</sub>**

|                                           |                     |
|-------------------------------------------|---------------------|
| E (PBE-D3/ma-def2-svp GAS_OPT) =          | -2210.4955298611    |
| E (PBE-D3/ma-def2-svp SMD_OPT) =          | -2210.5133528928    |
| $\Delta G_{\text{corr}}$ (ID-RR-HR GAS) = | <b>0.2576870600</b> |
| E (DLPNO-CCSDT/cc-p(wC)VTZ GAS_OPT GAS) = | -2210.1380758661    |
| E (DLPNO-CCSDT/cc-p(wC)VTZ GAS_OPT SMD) = | -2210.1569256905    |
| E (DLPNO-CCSDT/cc-p(wC)VTZ SMD_OPT SMD) = | -2210.1596862713    |
| E (PBE-D3/ma-def2-tzvp GAS_OPT GAS) =     | -2211.7949020496    |
| E (PBE-D3/ma-def2-tzvp GAS_OPT SMD) =     | -2211.8086437208    |

|                                        |           |           |           |                  |           |           |           |
|----------------------------------------|-----------|-----------|-----------|------------------|-----------|-----------|-----------|
| E (PBE-D3/ma-def2-tzvp GAS_OPT CPCM) = |           |           |           | -2211.8187475426 |           |           |           |
| GAS_OPT                                |           |           |           | SMD_OPT          |           |           |           |
| C                                      | 0.243199  | -0.522197 | 2.300675  | C                | 1.606287  | -3.309595 | 2.677016  |
| S                                      | -0.394361 | -2.227817 | 2.232464  | S                | -0.093372 | -3.437461 | 2.029634  |
| O                                      | -1.081313 | -2.391342 | 0.853856  | O                | -0.499879 | -2.009424 | 1.567067  |
| C                                      | 1.229162  | -3.069180 | 2.105555  | C                | 0.313274  | -4.375847 | 0.520776  |
| O                                      | 0.230302  | 1.643460  | -1.665316 | O                | 0.289301  | 2.117088  | -0.954408 |
| S                                      | 0.596284  | 1.984381  | -0.198242 | S                | -0.121710 | 3.568590  | -1.328965 |
| C                                      | 2.338256  | 2.545643  | -0.235139 | C                | 0.569507  | 3.880495  | -2.983991 |
| C                                      | -0.178890 | 3.605381  | 0.134527  | C                | -1.879051 | 3.506612  | -1.789962 |
| O                                      | -2.226950 | 1.406779  | 1.323227  | O                | -3.213709 | 2.478560  | 1.020388  |
| S                                      | -3.382518 | 0.852241  | 0.460459  | S                | -2.784384 | 1.050949  | 1.457436  |
| C                                      | -2.607860 | -0.068695 | -0.913925 | C                | -2.324110 | 0.139967  | -0.051998 |
| C                                      | -4.047134 | -0.610089 | 1.346373  | C                | -1.104569 | 1.190984  | 2.147411  |
| O                                      | 2.397667  | -0.708608 | -0.218932 | O                | 2.897712  | -2.390685 | -0.297190 |
| S                                      | 2.266330  | -1.476753 | -1.557724 | S                | 2.522732  | -0.960654 | -0.781551 |
| C                                      | 0.483589  | -1.599416 | -1.922671 | C                | 0.846631  | -1.065908 | -1.488075 |
| C                                      | 2.676864  | -0.276332 | -2.880678 | C                | 2.078235  | -0.000535 | 0.700358  |
| H                                      | -0.632292 | 0.149958  | 2.177059  | H                | 1.569914  | -2.631395 | 3.551037  |
| H                                      | 0.961266  | -0.382185 | 1.468297  | H                | 2.268845  | -2.914221 | 1.879496  |
| H                                      | 0.723655  | -0.370971 | 3.288457  | H                | 1.929297  | -4.318680 | 3.003312  |
| H                                      | 1.022453  | -4.133234 | 1.885861  | H                | -0.611257 | -4.432097 | -0.085292 |
| H                                      | 1.746811  | -2.977627 | 3.081133  | H                | 0.623270  | -5.397067 | 0.820796  |
| H                                      | 1.821750  | -2.589258 | 1.300827  | H                | 1.127738  | -3.852298 | -0.021675 |
| H                                      | 2.935453  | 1.627191  | -0.389353 | H                | 1.671434  | 3.892439  | -2.880847 |
| H                                      | 2.590923  | 2.999187  | 0.743585  | H                | 0.215055  | 4.868799  | -3.338571 |
| H                                      | 2.473020  | 3.271286  | -1.061201 | H                | 0.251571  | 3.074482  | -3.674310 |
| H                                      | -1.258882 | 3.398348  | 0.250765  | H                | -2.439154 | 3.244712  | -0.865752 |
| H                                      | 0.028559  | 4.289131  | -0.711387 | H                | -2.029456 | 2.743351  | -2.579303 |
| H                                      | 0.217867  | 4.004833  | 1.088629  | H                | -2.178423 | 4.510235  | -2.153510 |
| H                                      | -1.982740 | 0.657617  | -1.470247 | H                | -1.537745 | 0.705237  | -0.589600 |
| H                                      | -3.410067 | -0.475213 | -1.561993 | H                | -3.241152 | 0.036367  | -0.663256 |
| H                                      | -1.983082 | -0.875588 | -0.481088 | H                | -1.950464 | -0.854006 | 0.268639  |
| H                                      | -4.425627 | -0.246633 | 2.319947  | H                | -1.184232 | 1.768444  | 3.088262  |
| H                                      | -3.236729 | -1.356045 | 1.472663  | H                | -0.460075 | 1.708231  | 1.409271  |
| H                                      | -4.880761 | -1.031962 | 0.750369  | H                | -0.739006 | 0.163165  | 2.347975  |
| H                                      | 0.360785  | -2.169254 | -2.865461 | H                | 0.914558  | -1.690996 | -2.399065 |
| H                                      | 0.081414  | -0.569165 | -1.999178 | H                | 0.526071  | -0.034146 | -1.740665 |
| H                                      | 0.019179  | -2.137158 | -1.069971 | H                | 0.173091  | -1.519671 | -0.735379 |
| H                                      | 3.742205  | -0.006514 | -2.753362 | H                | 2.999353  | 0.114076  | 1.303522  |
| H                                      | 2.013557  | 0.605803  | -2.767372 | H                | 1.294505  | -0.553794 | 1.254283  |
| H                                      | 2.528654  | -0.770001 | -3.861488 | H                | 1.703366  | 0.985698  | 0.356685  |

### Li<sup>+</sup>(DMSO)<sub>4</sub>

|                                  |  |  |  |                  |  |  |  |
|----------------------------------|--|--|--|------------------|--|--|--|
| E (PBE-D3/ma-def2-svp GAS_OPT) = |  |  |  | -2217.9389799558 |  |  |  |
|----------------------------------|--|--|--|------------------|--|--|--|

|                                           |                                 |
|-------------------------------------------|---------------------------------|
| E (PBE-D3/ma-def2-svp SMD_OPT) =          | -2218.0043019898                |
| $\Delta G_{corr}$ (ID-RR-HR GAS) =        | <b>0.2604922600</b>             |
| E (DLPNO-CCSDT/cc-p(wC)VTZ GAS_OPT GAS) = | -2217.6007728249                |
| E (DLPNO-CCSDT/cc-p(wC)VTZ GAS_OPT SMD) = | -2217.6706320276                |
| E (DLPNO-CCSDT/cc-p(wC)VTZ SMD_OPT SMD) = | -2217.6709004169                |
| E (PBE-D3/ma-def2-tzvp GAS_OPT GAS) =     | -2219.2348444772                |
| E (PBE-D3/ma-def2-tzvp GAS_OPT SMD) =     | -2219.2999010173                |
| E (PBE-D3/ma-def2-tzvp GAS_OPT CPCM) =    | -2219.3023047522                |
| <b>GAS_OPT</b>                            | <b>SMD_OPT</b>                  |
| C -0.102864 -0.356594 3.983529            | C 2.388730 -0.516397 2.052990   |
| S 0.037110 -1.771327 2.840896             | S 0.894166 -1.383555 2.617160   |
| O -0.734397 -1.342315 1.554991            | O -0.314422 -0.676567 1.927628  |
| C 1.804625 -1.590371 2.430926             | C 1.150528 -2.930892 1.699594   |
| Li -0.206549 0.040837 0.292299            | Li -0.254858 0.162208 0.168586  |
| O 0.682747 1.391380 1.381133              | O 0.557451 1.923020 0.270706    |
| S 1.427548 2.652608 0.848088              | S 1.200841 2.449466 -1.048450   |
| C 2.962648 2.022405 0.089222              | C 1.525999 4.208678 -0.747266   |
| C 0.563764 3.118501 -0.688903             | C 2.917592 1.856892 -1.044661   |
| O -1.779948 0.387575 -0.812313            | O -2.078613 0.181981 -0.543547  |
| S -3.253145 -0.059004 -0.562551           | S -3.347612 0.364207 0.349736   |
| C -3.197195 -1.876864 -0.427057           | C -3.509305 -1.181437 1.291367  |
| C -3.587689 0.316219 1.189578             | C -2.850532 1.447412 1.721177   |
| O 1.057425 -0.308262 -1.178073            | O 0.932598 -0.803545 -1.071083  |
| S 0.445042 -1.130120 -2.353922            | S 0.474795 -1.586882 -2.344523  |
| C -0.130010 0.097995 -3.568838            | C -0.895134 -2.652311 -1.805586 |
| C 1.885469 -1.767772 -3.266852            | C -0.487744 -0.406952 -3.334264 |
| H -1.156172 -0.321954 4.319324            | H 2.335373 0.516053 2.444607    |
| H 0.174164 0.563552 3.430147              | H 2.420891 -0.525413 0.947283   |
| H 0.557351 -0.535534 4.854649             | H 3.268057 -1.037391 2.481490   |
| H 2.023002 -2.331346 1.639882             | H 0.253779 -3.558580 1.861530   |
| H 2.404203 -1.815195 3.334559             | H 2.043950 -3.439988 2.112640   |
| H 1.975163 -0.558752 2.067293             | H 1.285254 -2.688485 0.628223   |
| H 3.611403 1.681631 0.917797              | H 0.543816 4.711004 -0.660899   |
| H 3.459682 2.850445 -0.453104             | H 2.081216 4.617207 -1.614646   |
| H 2.694925 1.181550 -0.582211             | H 2.108002 4.323429 0.187957    |
| H -0.461719 3.414161 -0.400372            | H 2.863548 0.762643 -1.196518   |
| H 0.540399 2.241805 -1.363192             | H 3.395269 2.106725 -0.077051   |
| H 1.091563 3.978145 -1.146262             | H 3.457333 2.333462 -1.887025   |
| H -2.941157 -2.260770 -1.432088           | H -3.813966 -1.971063 0.578423  |
| H -4.201058 -2.241544 -0.133503           | H -4.299421 -1.046251 2.056328  |
| H -2.420488 -2.148615 0.316129            | H -2.528468 -1.411147 1.753629  |

|   |           |           |           |   |           |           |           |
|---|-----------|-----------|-----------|---|-----------|-----------|-----------|
| H | -3.562788 | 1.417369  | 1.288129  | H | -2.617998 | 2.436788  | 1.284597  |
| H | -2.797450 | -0.161692 | 1.800506  | H | -1.966479 | 1.013989  | 2.228871  |
| H | -4.596107 | -0.061292 | 1.448819  | H | -3.709086 | 1.538332  | 2.415975  |
| H | -0.958561 | 0.632406  | -3.066301 | H | -1.639278 | -2.026188 | -1.275429 |
| H | -0.498431 | -0.431940 | -4.469236 | H | -0.469643 | -3.424674 | -1.137465 |
| H | 0.700594  | 0.784227  | -3.824097 | H | -1.335350 | -3.136241 | -2.699780 |
| H | 2.379323  | -2.508771 | -2.611378 | H | -0.933161 | -0.952704 | -4.189807 |
| H | 2.574280  | -0.931551 | -3.493922 | H | 0.220483  | 0.355271  | -3.710033 |
| H | 1.533301  | -2.261231 | -4.193724 | H | -1.268601 | 0.047894  | -2.692465 |

## (DMSO)<sub>5</sub>

|                                           |                                 |
|-------------------------------------------|---------------------------------|
| E (PBE-D3/ma-def2-svp GAS_OPT) =          | -2763.1237470859                |
| E (PBE-D3/ma-def2-svp SMD_OPT) =          | -2763.1446869000                |
| $\Delta G_{\text{corr}}$ (ID-RR-HR GAS) = | <b>0.3273942900</b>             |
| E (DLPNO-CCSDT/cc-p(wC)VTZ GAS_OPT GAS) = | -2762.6763640437                |
| E (DLPNO-CCSDT/cc-p(wC)VTZ GAS_OPT SMD) = | -2762.7018418562                |
| E (DLPNO-CCSDT/cc-p(wC)VTZ SMD_OPT SMD) = | -2762.6999660541                |
| E (PBE-D3/ma-def2-tzvp GAS_OPT GAS) =     | -2764.7459011055                |
| E (PBE-D3/ma-def2-tzvp GAS_OPT SMD) =     | -2764.7641728541                |
| E (PBE-D3/ma-def2-tzvp GAS_OPT CPCM) =    | -2764.7765645039                |
| GAS_OPT                                   | SMD_OPT                         |
| C -1.390951 -1.120271 1.981691            | C -1.389612 -2.826849 3.610784  |
| S 0.033071 -2.241648 2.180496             | S -1.682443 -2.298527 1.890327  |
| O 0.469992 -2.150403 3.661207             | O -1.901084 -0.758493 1.956648  |
| C -0.870217 -3.819116 1.991600            | C 0.012826 -2.584846 1.280577   |
| O -2.490386 2.455408 -1.099065            | O 1.104104 2.790884 -2.888900   |
| S -1.323047 1.911393 -0.243517            | S 1.414298 2.999332 -1.385843   |
| C 0.202464 2.705270 -0.854681             | C 2.875531 1.975167 -1.014561   |
| C -1.415733 2.789352 1.359280             | C 2.222394 4.628376 -1.241302   |
| O -0.338926 0.512665 -3.246904            | O -2.371246 -1.169637 -2.669000 |
| S -1.692202 0.080976 -3.867100            | S -2.299195 -0.890783 -1.139910 |
| C -2.744209 -0.527220 -2.501242           | C -1.465671 0.718868 -0.952178  |
| C -2.603428 1.628646 -4.208897            | C -3.967011 -0.367623 -0.625532 |
| O -0.636322 -2.450654 -0.910247           | O 1.282204 -0.947991 -1.326888  |
| S 0.898316 -2.449640 -1.120261            | S 1.560315 -1.428534 -2.780863  |

|   |           |           |           |   |           |           |           |
|---|-----------|-----------|-----------|---|-----------|-----------|-----------|
| C | 1.155329  | -2.560531 | -2.932556 | C | 0.576613  | -2.944797 | -3.009156 |
| C | 1.463358  | -0.724885 | -0.935399 | C | 0.602425  | -0.346521 | -3.890023 |
| H | -1.755828 | -1.219347 | 0.941785  | H | -1.154120 | -3.910030 | 3.611568  |
| H | -0.982386 | -0.107918 | 2.150945  | H | -2.325879 | -2.647892 | 4.173006  |
| H | -2.161730 | -1.376538 | 2.734054  | H | -0.547280 | -2.233830 | 4.022662  |
| H | -0.135565 | -4.626620 | 2.168616  | H | 0.107413  | -2.118577 | 0.279228  |
| H | -1.247010 | -3.853444 | 0.950482  | H | 0.155003  | -3.682019 | 1.200337  |
| H | -1.681772 | -3.867694 | 2.743131  | H | 0.735948  | -2.140545 | 1.993973  |
| H | 1.029662  | 2.396363  | -0.185115 | H | 3.255257  | 2.230987  | -0.005489 |
| H | 0.061678  | 3.803733  | -0.865725 | H | 3.652448  | 2.170395  | -1.780738 |
| H | 0.342366  | 2.307127  | -1.878265 | H | 2.538170  | 0.918882  | -1.049859 |
| H | -1.453993 | 3.880356  | 1.173948  | H | 1.470100  | 5.389628  | -1.523342 |
| H | -0.527927 | 2.487911  | 1.949833  | H | 3.095458  | 4.674105  | -1.921776 |
| H | -2.346873 | 2.453104  | 1.852440  | H | 2.531167  | 4.782018  | -0.187943 |
| H | -2.137288 | -1.293435 | -1.973248 | H | -0.390152 | 0.522229  | -1.117975 |
| H | -3.651118 | -0.981593 | -2.948312 | H | -1.643159 | 1.088828  | 0.074057  |
| H | -2.999252 | 0.321209  | -1.835364 | H | -1.873922 | 1.416898  | -1.709132 |
| H | -2.058511 | 2.149011  | -5.018458 | H | -4.645381 | -1.224593 | -0.800895 |
| H | -2.619871 | 2.223279  | -3.271203 | H | -4.288869 | 0.509361  | -1.220862 |
| H | -3.627292 | 1.368771  | -4.543919 | H | -3.921926 | -0.133507 | 0.455875  |
| H | 0.690227  | -3.508946 | -3.259677 | H | 0.982953  | -3.707082 | -2.317246 |
| H | 2.244833  | -2.584495 | -3.133112 | H | 0.700215  | -3.288143 | -4.055859 |
| H | 0.680878  | -1.682145 | -3.414092 | H | -0.486914 | -2.717855 | -2.789918 |
| H | 1.333195  | -0.428809 | 0.123279  | H | 0.934058  | 0.693902  | -3.688821 |
| H | 0.854089  | -0.099947 | -1.618620 | H | -0.480003 | -0.463372 | -3.675300 |
| H | 2.537598  | -0.688943 | -1.208684 | H | 0.839213  | -0.633739 | -4.934534 |
| O | 1.247453  | 0.985137  | 1.909645  | O | 1.451251  | -0.920980 | 3.819272  |
| S | 2.115605  | 1.096518  | 3.185221  | S | 1.327495  | 0.611283  | 3.599708  |
| C | 3.067677  | -0.451238 | 3.318177  | C | 0.935127  | 0.860575  | 1.834538  |
| C | 3.501726  | 2.206332  | 2.727680  | C | -0.305954 | 1.097795  | 4.249925  |
| H | 2.314679  | -1.240366 | 3.546665  | H | 1.779730  | 0.451024  | 1.252450  |
| H | 3.790816  | -0.346988 | 4.151107  | H | 0.832662  | 1.948785  | 1.653827  |
| H | 3.583708  | -0.644909 | 2.357241  | H | -0.006556 | 0.325102  | 1.606771  |
| H | 3.068031  | 3.209085  | 2.554577  | H | -0.289359 | 0.918923  | 5.342047  |
| H | 3.974118  | 1.827823  | 1.800127  | H | -1.081840 | 0.485409  | 3.745689  |
| H | 4.230968  | 2.248268  | 3.560435  | H | -0.456802 | 2.178011  | 4.050574  |

## Li<sup>+</sup>(DMSO)<sub>5</sub>

|                                           |                     |
|-------------------------------------------|---------------------|
| E (PBE-D3/ma-def2-svp GAS_OPT) =          | -2770.5697690941    |
| E (PBE-D3/ma-def2-svp SMD_OPT) =          | -2770.6362333428    |
| $\Delta G_{\text{corr}}$ (ID-RR-HR GAS) = | <b>0.3299401700</b> |
| E (DLPNO-CCSDT/cc-p(wC)VTZ GAS_OPT GAS) = | -2770.1414439347    |
| E (DLPNO-CCSDT/cc-p(wC)VTZ GAS_OPT SMD) = | -2770.2126210677    |

|                                           |                                 |
|-------------------------------------------|---------------------------------|
| E (DLPNO-CCSDT/cc-p(wC)VTZ SMD_OPT SMD) = | -2770.2139010531                |
| E (PBE-D3/ma-def2-tzvp GAS_OPT GAS) =     | -2772.1895074900                |
| E (PBE-D3/ma-def2-tzvp GAS_OPT SMD) =     | -2772.2538942960                |
| E (PBE-D3/ma-def2-tzvp GAS_OPT CPCM) =    | -2772.2591981931                |
| GAS_OPT                                   | SMD_OPT                         |
| C 0.841570 -1.739482 3.191864             | C 0.697496 -1.735772 3.167676   |
| S 0.975921 -2.003701 1.395327             | S 0.798793 -1.933021 1.364286   |
| O -0.238687 -1.254120 0.764477            | O -0.364849 -1.074326 0.775622  |
| C 2.432198 -0.950708 1.098988             | C 2.319999 -0.978079 1.096785   |
| Li -0.240924 -0.054020 -0.774670          | Li -0.352665 0.095649 -0.793027 |
| O -0.367350 1.778972 -0.251705            | O -0.370496 1.953198 -0.282541  |
| S 0.465307 3.020117 -0.672761             | S 0.605204 3.095218 -0.690999   |
| C 2.207396 2.577306 -0.362208             | C 2.283225 2.488519 -0.340202   |
| C 0.514717 2.972039 -2.496824             | C 0.698890 3.038962 -2.506330   |
| O -1.837754 -0.659321 -1.742909           | O -1.945658 -0.518377 -1.751138 |
| S -3.128571 -0.601359 -0.876119           | S -3.188753 -0.763061 -0.839383 |
| C -4.499979 -0.754620 -2.063220           | C -4.606244 -0.803633 -1.969953 |
| C -3.254249 -2.237080 -0.083317           | C -3.150436 -2.523095 -0.396123 |
| O 1.299590 -0.348365 -1.969448            | O 1.179083 -0.271620 -1.968338  |
| S 1.181998 -1.230223 -3.251159            | S 1.001097 -1.253085 -3.172987  |
| C 2.860707 -1.883968 -3.518844            | C 2.686629 -1.739483 -3.629054  |
| C 0.363144 -2.767478 -2.721762            | C 0.446592 -2.827297 -2.460083  |
| H -0.110680 -2.201695 3.512778            | H -0.296378 -2.107989 3.481574  |
| H 0.869581 -0.647106 3.387871             | H 0.840779 -0.666767 3.425883   |
| H 1.691407 -2.259534 3.676646             | H 1.490067 -2.365355 3.619434   |
| H 2.539870 -0.882700 -0.000414            | H 2.445271 -0.890161 0.000778   |
| H 3.314266 -1.444331 1.552672             | H 3.164173 -1.545246 1.537879   |
| H 2.236545 0.042000 1.554144              | H 2.200889 0.012499 1.581339    |
| H 2.292255 2.401962 0.728510              | H 2.350945 2.343986 0.755503    |
| H 2.850055 3.425597 -0.669684             | H 3.007057 3.262195 -0.665657   |
| H 2.447662 1.656340 -0.927553             | H 2.445796 1.536009 -0.880049   |
| H -0.516020 3.163452 -2.848449            | H -0.294958 3.334337 -2.892876  |
| H 0.857444 1.965898 -2.806601             | H 0.953584 2.004864 -2.810846   |
| H 1.192033 3.769873 -2.859336             | H 1.464941 3.764160 -2.845338   |
| H -4.513335 0.176503 -2.659414            | H -4.733920 0.219625 -2.371101  |
| H -5.449523 -0.859246 -1.502816           | H -5.506908 -1.097277 -1.395511 |
| H -4.318500 -1.629921 -2.716200           | H -4.404842 -1.522525 -2.787991 |
| H -2.344376 -2.312602 0.543697            | H -2.246023 -2.654707 0.226898  |
| H -3.268086 -3.028117 -0.857830           | H -3.106761 -3.143859 -1.312215 |
| H -4.170068 -2.268399 0.539065            | H -4.059141 -2.756887 0.193528  |
| H 3.504206 -1.021893 -3.775130            | H 3.188139 -0.838234 -4.029573  |
| H 2.834109 -2.597289 -4.365696            | H 2.626043 -2.516710 -4.416248  |
| H 3.218434 -2.374310 -2.593121            | H 3.219218 -2.119173 -2.735553  |
| H -0.654888 -2.457042 -2.413115           | H -0.560790 -2.636048 -2.046467 |
| H 0.917272 -3.209749 -1.871291            | H 1.152215 -3.156732 -1.673208  |
| H 0.321266 -3.462348 -3.583295            | H 0.388445 -3.577305 -3.273695  |
| O 1.286791 1.445219 2.818747              | O 1.455244 1.527354 3.048650    |

|   |           |          |          |   |           |          |          |
|---|-----------|----------|----------|---|-----------|----------|----------|
| S | 0.106939  | 2.444440 | 2.750176 | S | 0.246973  | 2.482440 | 2.833982 |
| C | -1.422585 | 1.447849 | 2.773500 | C | -1.244378 | 1.442854 | 2.803681 |
| C | -0.031358 | 3.160092 | 4.427158 | C | -0.046953 | 3.294211 | 4.438669 |
| H | -1.372472 | 0.811345 | 1.871810 | H | -1.109441 | 0.729065 | 1.968410 |
| H | -2.291946 | 2.131825 | 2.716624 | H | -2.118847 | 2.096268 | 2.612557 |
| H | -1.454496 | 0.834515 | 3.694729 | H | -1.355491 | 0.910271 | 3.768891 |
| H | 0.868996  | 3.782643 | 4.583719 | H | 0.812321  | 3.965122 | 4.629193 |
| H | -0.065093 | 2.342139 | 5.172585 | H | -0.126367 | 2.528574 | 5.235550 |
| H | -0.940741 | 3.790597 | 4.479802 | H | -0.978812 | 3.890442 | 4.369719 |

## GBL

|                                           |                                 |
|-------------------------------------------|---------------------------------|
| E (PBE-D3/ma-def2-svp GAS_OPT) =          | -305.9341008593                 |
| E (PBE-D3/ma-def2-svp SMD_OPT) =          | -305.9486384456                 |
| $\Delta G_{\text{corr}}$ (ID-RR-HR GAS) = | <b>0.0668101500</b>             |
| E (DLPNO-CCSDT/cc-p(wC)VTZ GAS_OPT GAS) = | -306.0344394527                 |
| E (DLPNO-CCSDT/cc-p(wC)VTZ GAS_OPT SMD) = | -306.0458051277                 |
| E (DLPNO-CCSDT/cc-p(wC)VTZ SMD_OPT SMD) = | -306.0461809580                 |
| E (PBE-D3/ma-def2-tzvp GAS_OPT GAS) =     | -306.2674665634                 |
| E (PBE-D3/ma-def2-tzvp GAS_OPT SMD) =     | -306.2811441284                 |
| E (PBE-D3/ma-def2-tzvp GAS_OPT CPCM) =    | -306.2807123831                 |
| <b>GAS_OPT</b>                            | <b>SMD_OPT</b>                  |
| H -2.725680 2.401573 -3.602773            | H -2.712566 2.398510 -3.602011  |
| O -2.517059 1.120890 -1.975517            | O -2.509953 1.114986 -1.971470  |
| C -1.308842 0.469849 -1.976147            | C -1.312279 0.468511 -1.985121  |
| C -0.910106 0.172376 -3.420933            | C -0.912386 0.173256 -3.419704  |
| C -2.220412 0.333535 -4.195185            | C -2.223716 0.329671 -4.193334  |
| C -2.972808 1.352534 -3.326062            | C -2.972200 1.352009 -3.334970  |
| H -0.431468 -0.822065 -3.490265           | H -0.428334 -0.818290 -3.495476 |
| H -0.148195 0.926239 -3.717111            | H -0.159385 0.938065 -3.712539  |
| H -2.773410 -0.627858 -4.221589           | H -2.776254 -0.631710 -4.214566 |
| H -2.094035 0.681014 -5.238651            | H -2.093376 0.678963 -5.234805  |
| H -4.073545 1.236111 -3.335590            | H -4.072540 1.240803 -3.338136  |
| O -0.709643 0.217045 -0.957577            | O -0.712216 0.216468 -0.955268  |

**(GBL)<sub>4</sub>**

|                                           |                                 |
|-------------------------------------------|---------------------------------|
| E (PBE-D3/ma-def2-svp GAS_OPT) =          | -1223.7876355697                |
| E (PBE-D3/ma-def2-svp SMD_OPT) =          | -1223.8156291751                |
| $\Delta G_{\text{corr}}$ (ID-RR-HR GAS) = | <b>0.3308218000</b>             |
| E (DLPNO-CCSDT/cc-p(wC)VTZ GAS_OPT GAS) = | -1224.1903764430                |
| E (DLPNO-CCSDT/cc-p(wC)VTZ GAS_OPT SMD) = | -1224.2093733705                |
| E (DLPNO-CCSDT/cc-p(wC)VTZ SMD_OPT SMD) = | -1224.2099022556                |
| E (PBE-D3/ma-def2-tzvp GAS_OPT GAS) =     | -1225.1119689620                |
| E (PBE-D3/ma-def2-tzvp GAS_OPT SMD) =     | -1225.1359956994                |
| E (PBE-D3/ma-def2-tzvp GAS_OPT CPCM) =    | -1225.1357680619                |
| <b>GAS_OPT</b>                            | <b>SMD_OPT</b>                  |
| H 4.469547 -1.147477 -5.337321            | H 0.256106 -1.510246 -2.207474  |
| O 3.225282 0.466029 -4.949796             | O -0.424651 0.432128 -1.893286  |
| C 1.930577 0.078235 -4.774771             | C -1.780349 0.499398 -1.990725  |
| C 1.606646 -1.062032 -5.724947            | C -2.262209 -0.442231 -3.077479 |
| C 2.763430 -1.039830 -6.730173            | C -0.988588 -0.762619 -3.864678 |
| C 3.890108 -0.394159 -5.908808            | C 0.095326 -0.585631 -2.798554  |
| H 0.600259 -0.921960 -6.163037            | H -3.077081 0.023297 -3.662753  |
| H 1.592485 -2.002254 -5.129223            | H -2.678914 -1.337627 -2.568761 |
| H 2.513005 -0.409248 -7.608100            | H -0.844115 -0.029531 -4.683884 |
| H 3.045906 -2.044003 -7.099331            | H -0.975109 -1.778486 -4.302011 |
| H 4.582089 0.237725 -6.496999             | H 1.064613 -0.221717 -3.186038  |
| O 1.209557 0.618019 -3.957172             | O -2.434266 1.236002 -1.271652  |
| H 3.461568 2.257388 -3.241162             | H -1.998867 -0.285573 1.097176  |
| O 4.476271 1.511953 -1.599204             | O -1.445226 -1.879969 -0.110344 |
| C 4.118041 1.326119 -0.289336             | C -1.252876 -3.208319 0.124479  |
| C 2.971779 2.266168 0.055294              | C -1.018587 -3.433878 1.605022  |
| C 2.450459 2.715355 -1.312474             | C -1.486347 -2.125301 2.249191  |
| C 3.689351 2.568867 -2.205591             | C -1.271554 -1.116807 1.116721  |
| H 3.391785 3.101371 0.657716              | H 0.072432 -3.597255 1.749949   |
| H 2.229375 1.733270 0.676769              | H -1.545770 -4.344632 1.945490  |
| H 2.044307 3.745171 -1.325833             | H -0.923742 -1.849288 3.160422  |
| H 1.660488 2.022097 -1.660175             | H -2.562425 -2.181267 2.510396  |
| H 4.316735 3.487321 -2.223983             | H -0.246374 -0.697393 1.111355  |
| O 4.684543 0.515836 0.412995              | O -1.277991 -4.021941 -0.782282 |
| H 4.459656 -0.757699 -2.132949            | H 1.697906 -0.131953 -0.393608  |
| O 3.501521 -2.239490 -3.236496            | O 2.153454 -2.000740 0.417825   |



|   |           |           |           |   |           |           |           |
|---|-----------|-----------|-----------|---|-----------|-----------|-----------|
| C | 2.671856  | -3.262503 | -2.890472 | C | 2.477363  | -1.916746 | 1.738591  |
| C | 2.909667  | -3.632502 | -1.436273 | C | 3.187425  | -0.605352 | 2.004534  |
| C | 3.613106  | -2.393976 | -0.873108 | C | 3.654321  | -0.169731 | 0.613841  |
| C | 4.342929  | -1.855236 | -2.107178 | C | 2.581929  | -0.792511 | -0.281878 |
| H | 3.558224  | -4.536965 | -1.423817 | H | 3.984696  | -0.735613 | 2.759448  |
| H | 1.952318  | -3.893048 | -0.950541 | H | 2.428464  | 0.095462  | 2.422190  |
| H | 4.307447  | -2.596754 | -0.036910 | H | 4.648653  | -0.602662 | 0.383047  |
| H | 2.864784  | -1.655816 | -0.522550 | H | 3.707653  | 0.926868  | 0.485141  |
| H | 5.336957  | -2.330283 | -2.256514 | H | 2.938399  | -1.097918 | -1.282877 |
| O | 1.896094  | -3.747881 | -3.695404 | O | 2.185575  | -2.806319 | 2.520115  |
| H | -1.603952 | -2.953746 | -1.841553 | H | 0.830581  | 2.521116  | -1.018107 |
| O | 0.203389  | -1.962702 | -1.583199 | O | 1.375200  | 2.280265  | 0.977509  |
| C | 0.068998  | -0.653003 | -1.222753 | C | 0.290047  | 2.111988  | 1.781353  |
| C | -1.158049 | -0.065327 | -1.903632 | C | -0.866577 | 2.931945  | 1.249303  |
| C | -1.478698 | -1.075753 | -3.008716 | C | -0.184392 | 3.945453  | 0.325875  |
| C | -0.877865 | -2.377102 | -2.455046 | C | 1.046172  | 3.162385  | -0.138773 |
| H | -0.929844 | 0.954584  | -2.263212 | H | -1.461477 | 3.360194  | 2.077162  |
| H | -1.961258 | 0.012217  | -1.138629 | H | -1.521489 | 2.242860  | 0.669167  |
| H | -0.954205 | -0.777472 | -3.936690 | H | 0.123728  | 4.846913  | 0.894097  |
| H | -2.558473 | -1.175707 | -3.230321 | H | -0.813160 | 4.268474  | -0.525049 |
| H | -0.439293 | -3.047471 | -3.218185 | H | 1.938158  | 3.782533  | -0.344717 |
| O | 0.844704  | -0.122092 | -0.454981 | O | 0.333053  | 1.377363  | 2.755065  |

### Li<sup>+</sup>(GBL)<sub>4</sub>

|                                           |                                 |
|-------------------------------------------|---------------------------------|
| E (PBE-D3/ma-def2-svp GAS_OPT) =          | -1231.2078200895                |
| E (PBE-D3/ma-def2-svp SMD_OPT) =          | -1231.2862310505                |
| $\Delta G_{\text{corr}}$ (ID-RR-HR GAS) = | <b>0.3317891600</b>             |
| E (DLPNO-CCSDT/cc-p(wC)VTZ GAS_OPT GAS) = | -1231.6269968141                |
| E (DLPNO-CCSDT/cc-p(wC)VTZ GAS_OPT SMD) = | -1231.6957099730                |
| E (DLPNO-CCSDT/cc-p(wC)VTZ SMD_OPT SMD) = | -1231.7004768049                |
| E (PBE-D3/ma-def2-tzvp GAS_OPT GAS) =     | -1232.5379505069                |
| E (PBE-D3/ma-def2-tzvp GAS_OPT SMD) =     | -1232.6107488153                |
| E (PBE-D3/ma-def2-tzvp GAS_OPT CPCM) =    | -1232.6044998883                |
| GAS_OPT                                   | SMD_OPT                         |
| Li 0.065712 0.062281 -0.015773            | Li -0.998779 -0.587634 0.922876 |

|   |           |           |           |   |           |           |           |
|---|-----------|-----------|-----------|---|-----------|-----------|-----------|
| H | -2.905424 | 1.313678  | -5.095172 | H | 1.525493  | 2.124070  | -2.401805 |
| O | -2.321913 | 0.289051  | -3.387486 | O | -0.170806 | 1.159491  | -1.669279 |
| C | -1.175490 | 0.255122  | -2.688332 | C | -0.099860 | -0.178065 | -1.811491 |
| C | -0.010309 | 0.687164  | -3.555753 | C | 0.616229  | -0.534629 | -3.091889 |
| C | -0.695907 | 1.364670  | -4.748744 | C | 0.592180  | 0.775609  | -3.885781 |
| C | -2.065135 | 0.672107  | -4.772530 | C | 0.523433  | 1.823897  | -2.773254 |
| H | 0.547841  | -0.230706 | -3.844781 | H | 0.133820  | -1.399990 | -3.583081 |
| H | 0.681938  | 1.321777  | -2.970143 | H | 1.647129  | -0.847370 | -2.814009 |
| H | -0.151970 | 1.248056  | -5.704574 | H | -0.317748 | 0.826865  | -4.516548 |
| H | -0.815696 | 2.450118  | -4.557807 | H | 1.475520  | 0.920363  | -4.534571 |
| H | -2.069628 | -0.258196 | -5.378511 | H | -0.053572 | 2.732070  | -3.025252 |
| O | -1.165977 | -0.094206 | -1.512599 | O | -0.568739 | -0.934226 | -0.965970 |
| H | 4.408109  | 3.870767  | -0.011139 | H | 3.691051  | 0.835254  | -1.021851 |
| O | 3.089552  | 2.672187  | -1.084343 | O | 2.140746  | 0.349721  | 0.280360  |
| C | 2.432963  | 1.794569  | -0.308097 | C | 1.440836  | 1.069037  | 1.181452  |
| C | 3.328769  | 1.297177  | 0.808458  | C | 2.226807  | 2.287304  | 1.603021  |
| C | 4.730743  | 1.704966  | 0.338807  | C | 3.286955  | 2.416619  | 0.504505  |
| C | 4.433077  | 2.908900  | -0.565143 | C | 3.450046  | 0.965628  | 0.049064  |
| H | 3.167536  | 0.213792  | 0.967141  | H | 2.675315  | 2.057409  | 2.594800  |
| H | 3.018619  | 1.817800  | 1.741284  | H | 1.560770  | 3.160331  | 1.732917  |
| H | 5.192566  | 0.886105  | -0.248698 | H | 4.242252  | 2.848513  | 0.855307  |
| H | 5.422865  | 1.961729  | 1.162283  | H | 2.908323  | 3.045028  | -0.327094 |
| H | 5.105846  | 3.014490  | -1.435794 | H | 4.188871  | 0.405669  | 0.658315  |
| O | 1.266267  | 1.497166  | -0.542487 | O | 0.332482  | 0.708706  | 1.563577  |
| H | 2.030669  | -3.452349 | 3.830486  | H | 1.320563  | -5.657590 | 3.234423  |
| O | 2.291928  | -2.851618 | 1.856540  | O | 0.046781  | -4.036065 | 2.955927  |
| C | 1.190712  | -2.297500 | 1.322886  | C | 0.173048  | -2.881986 | 2.279786  |
| C | -0.054808 | -2.971789 | 1.862451  | C | 1.633819  | -2.544652 | 2.079137  |
| C | 0.484768  | -4.272167 | 2.470199  | C | 2.338422  | -3.877289 | 2.350627  |
| C | 1.930933  | -3.890847 | 2.815372  | C | 1.368187  | -4.556691 | 3.318391  |
| H | -0.810407 | -3.094524 | 1.063975  | H | 1.894572  | -1.768816 | 2.832618  |
| H | -0.494205 | -2.281929 | 2.616231  | H | 1.806279  | -2.104423 | 1.080119  |
| H | 0.470213  | -5.087075 | 1.718744  | H | 3.348126  | -3.767308 | 2.787532  |
| H | -0.077887 | -4.619427 | 3.356723  | H | 2.423636  | -4.465129 | 1.414587  |
| H | 2.666148  | -4.708705 | 2.703808  | H | 1.551874  | -4.277178 | 4.376628  |
| O | 1.274915  | -1.364418 | 0.532159  | O | -0.818044 | -2.248007 | 1.927989  |
| H | -4.317348 | 1.382687  | 3.536380  | H | -5.211888 | 3.090270  | 0.049304  |
| O | -2.890706 | 0.017827  | 2.880935  | O | -4.686317 | 1.309942  | 0.995599  |
| C | -2.301660 | 0.393169  | 1.732323  | C | -3.588396 | 0.757955  | 0.452060  |
| C | -3.297668 | 1.093020  | 0.828932  | C | -3.559301 | 1.000319  | -1.040484 |
| C | -4.651507 | 0.721855  | 1.446486  | C | -5.004029 | 1.398817  | -1.356820 |
| C | -4.279690 | 0.464666  | 2.913019  | C | -5.460762 | 2.011809  | -0.032111 |
| H | -3.142381 | 0.776967  | -0.220225 | H | -3.180852 | 0.110868  | -1.576632 |
| H | -3.085367 | 2.183721  | 0.880681  | H | -2.839902 | 1.828630  | -1.221218 |
| H | -5.046253 | -0.203328 | 0.980360  | H | -5.608346 | 0.500342  | -1.594776 |
| H | -5.422905 | 1.507516  | 1.342628  | H | -5.095757 | 2.113444  | -2.195482 |
| H | -4.867395 | -0.329117 | 3.409364  | H | -6.529956 | 1.864476  | 0.205945  |
| O | -1.115054 | 0.162802  | 1.529475  | O | -2.770509 | 0.168590  | 1.152533  |

**Li<sup>+</sup> in GBL**

|                                           |                |
|-------------------------------------------|----------------|
| E (PBE-D3/ma-def2-svp GAS_OPT) =          | -7.2519251623  |
| E (PBE-D3/ma-def2-svp SMD_OPT) =          | -7.3917970144  |
| $\Delta G_{\text{corr}}$ (ID-RR-HR GAS) = | -0.0127326619  |
| E (DLPNO-CCSDT/cc-p(wC)VTZ GAS_OPT GAS) = | -7.2736440090  |
| E (DLPNO-CCSDT/cc-p(wC)VTZ GAS_OPT SMD) = | -7.4155086302  |
| E (DLPNO-CCSDT/cc-p(wC)VTZ SMD_OPT SMD) = | -7.4155086302  |
| E (PBE-D3/ma-def2-tzvp GAS_OPT GAS) =     | -7.2566456293  |
| E (PBE-D3/ma-def2-tzvp GAS_OPT SMD) =     | -7.3963522720  |
| E (PBE-D3/ma-def2-tzvp GAS_OPT CPCM) =    | -7.4405651965  |
| GAS_OPT                                   | SMD_OPT        |
| Li 0.0 0.0 0.0                            | Li 0.0 0.0 0.0 |

**(GBL)<sub>5</sub>**

|                                           |                     |
|-------------------------------------------|---------------------|
| E (PBE-D3/ma-def2-svp GAS_OPT) =          | -1529.7430284144    |
| E (PBE-D3/ma-def2-svp SMD_OPT) =          | -1529.7745740099    |
| $\Delta G_{\text{corr}}$ (ID-RR-HR GAS) = | <b>0.4203686600</b> |
| E (DLPNO-CCSDT/cc-p(wC)VTZ GAS_OPT GAS) = | -1530.2478813412    |
| E (DLPNO-CCSDT/cc-p(wC)VTZ GAS_OPT SMD) = | -1530.2681033191    |
| E (DLPNO-CCSDT/cc-p(wC)VTZ SMD_OPT SMD) = | -1530.2675148320    |
| E (PBE-D3/ma-def2-tzvp GAS_OPT GAS) =     | -1531.3964538869    |
| E (PBE-D3/ma-def2-tzvp GAS_OPT SMD) =     | -1531.4224945321    |

| E (PBE-D3/ma-def2-tzvp GAS_OPT CPCM) = |           |           |           | -1531.4220642321 |           |           |           |
|----------------------------------------|-----------|-----------|-----------|------------------|-----------|-----------|-----------|
| GAS_OPT                                |           |           |           | SMD_OPT          |           |           |           |
| H                                      | 2.298686  | 3.180896  | -2.311891 | H                | 6.848510  | -0.640796 | 2.825646  |
| O                                      | 1.395273  | 4.445993  | -0.934236 | O                | 7.391079  | -0.651238 | 0.822187  |
| C                                      | 0.351023  | 5.143082  | -1.467231 | C                | 7.577789  | 0.338421  | -0.096167 |
| C                                      | 0.671441  | 5.509010  | -2.909932 | C                | 6.827474  | 1.581251  | 0.339657  |
| C                                      | 2.179069  | 5.263995  | -3.026673 | C                | 6.539294  | 1.325506  | 1.821904  |
| C                                      | 2.423100  | 4.214469  | -1.931043 | C                | 6.490353  | -0.204597 | 1.876451  |
| H                                      | 0.339952  | 6.542271  | -3.125216 | H                | 5.902166  | 1.616077  | -0.277816 |
| H                                      | 0.097649  | 4.814112  | -3.556599 | H                | 7.416373  | 2.491129  | 0.119783  |
| H                                      | 2.745955  | 6.192938  | -2.810004 | H                | 5.600660  | 1.784651  | 2.184383  |
| H                                      | 2.489314  | 4.894621  | -4.022300 | H                | 7.370203  | 1.704241  | 2.450711  |
| H                                      | 3.401990  | 4.309276  | -1.422836 | H                | 5.482972  | -0.608786 | 1.650129  |
| O                                      | -0.650039 | 5.393015  | -0.826438 | O                | 8.253765  | 0.155186  | -1.093104 |
| H                                      | -2.962417 | 4.357798  | -0.958686 | H                | 1.269082  | 2.606911  | -2.745792 |
| O                                      | -4.351486 | 3.111753  | -1.890594 | O                | 2.808722  | 1.952423  | -1.507656 |
| C                                      | -3.831617 | 2.559030  | -3.024056 | C                | 3.347902  | 0.775708  | -1.925573 |
| C                                      | -2.960899 | 3.579808  | -3.735087 | C                | 2.258572  | -0.121303 | -2.481022 |
| C                                      | -3.320641 | 4.907299  | -3.059543 | C                | 0.957989  | 0.544130  | -2.022657 |
| C                                      | -3.800485 | 4.443107  | -1.679051 | C                | 1.386351  | 2.001897  | -1.822327 |
| H                                      | -3.137885 | 3.536887  | -4.826469 | H                | 2.403328  | -1.160768 | -2.131083 |
| H                                      | -1.902668 | 3.281234  | -3.567766 | H                | 2.366417  | -0.124957 | -3.587246 |
| H                                      | -4.138185 | 5.418063  | -3.608846 | H                | 0.606852  | 0.106133  | -1.067924 |
| H                                      | -2.471163 | 5.609083  | -2.966512 | H                | 0.132330  | 0.457614  | -2.753013 |
| H                                      | -4.603349 | 5.064489  | -1.239293 | H                | 0.876719  | 2.522586  | -0.990183 |
| O                                      | -4.060883 | 1.404309  | -3.333188 | O                | 4.546639  | 0.567088  | -1.855108 |
| H                                      | 1.399086  | -0.848209 | -1.392802 | H                | 4.968477  | -1.493901 | -0.563762 |
| O                                      | 1.275630  | 0.801687  | -2.649553 | O                | 5.329710  | -3.116328 | 0.703014  |
| C                                      | 0.257722  | 1.290866  | -3.409900 | C                | 6.586906  | -3.610658 | 0.549321  |
| C                                      | -0.724384 | 0.179444  | -3.732686 | C                | 7.000036  | -3.506953 | -0.906735 |
| C                                      | -0.349534 | -0.930469 | -2.747293 | C                | 5.672736  | -3.284287 | -1.638515 |
| C                                      | 1.123093  | -0.629819 | -2.440765 | C                | 4.829547  | -2.592567 | -0.564355 |
| H                                      | -0.555862 | -0.111400 | -4.793072 | H                | 7.570712  | -4.402308 | -1.216200 |
| H                                      | -1.766645 | 0.543900  | -3.655137 | H                | 7.674459  | -2.626851 | -0.987473 |
| H                                      | -0.493960 | -1.953578 | -3.143333 | H                | 5.217758  | -4.255353 | -1.921938 |
| H                                      | -0.938511 | -0.831722 | -1.816912 | H                | 5.763522  | -2.665343 | -2.550988 |
| H                                      | 1.824818  | -1.143488 | -3.133265 | H                | 3.746748  | -2.808910 | -0.599387 |
| O                                      | 0.238033  | 2.456101  | -3.763383 | O                | 7.215342  | -4.052961 | 1.496607  |
| H                                      | 0.094689  | 1.900629  | 3.674530  | H                | 3.128877  | 1.522880  | 1.201661  |
| O                                      | -0.729467 | 0.693696  | 2.198295  | O                | 2.724068  | -0.485850 | 0.885009  |
| C                                      | 0.147043  | 0.357965  | 1.205235  | C                | 1.605575  | -1.244091 | 1.039777  |
| C                                      | 1.078732  | 1.527172  | 0.930444  | C                | 0.653699  | -0.560596 | 2.004321  |
| C                                      | 0.404375  | 2.710862  | 1.630276  | C                | 1.190194  | 0.871675  | 2.089442  |
| C                                      | -0.442665 | 2.022225  | 2.708731  | C                | 2.674147  | 0.681165  | 1.755694  |
| H                                      | 1.203468  | 1.655053  | -0.160588 | H                | 0.732571  | -1.098450 | 2.972926  |
| H                                      | 2.073066  | 1.271704  | 1.358094  | H                | -0.390604 | -0.655323 | 1.652496  |
| H                                      | -0.241615 | 3.254452  | 0.915997  | H                | 1.048503  | 1.343353  | 3.079764  |
| H                                      | 1.117150  | 3.440673  | 2.057458  | H                | 0.699782  | 1.517487  | 1.332977  |
| H                                      | -1.412370 | 2.520504  | 2.895256  | H                | 3.279944  | 0.453845  | 2.657007  |
| O                                      | 0.116110  | -0.737905 | 0.679476  | O                | 1.466299  | -2.302811 | 0.450740  |
| H                                      | -5.053367 | 2.236646  | 0.767106  | H                | 3.279736  | -3.682060 | 2.183957  |
| O                                      | -2.984364 | 2.344270  | 0.685377  | O                | 3.096760  | -2.207867 | 3.640689  |

|   |           |           |           |   |          |           |          |
|---|-----------|-----------|-----------|---|----------|-----------|----------|
| C | -2.477807 | 1.494653  | -0.254214 | C | 4.303430 | -1.870112 | 4.170106 |
| C | -3.266802 | 0.199844  | -0.256406 | C | 5.185017 | -3.099800 | 4.254082 |
| C | -4.085280 | 0.267522  | 1.036451  | C | 4.195093 | -4.259394 | 4.106108 |
| C | -4.178917 | 1.781111  | 1.278816  | C | 3.081366 | -3.620211 | 3.272134 |
| H | -2.572228 | -0.658772 | -0.315686 | H | 5.773533 | -3.092804 | 5.190594 |
| H | -3.888976 | 0.207335  | -1.178171 | H | 5.900461 | -3.066663 | 3.402495 |
| H | -3.532013 | -0.219612 | 1.863687  | H | 3.806232 | -4.569183 | 5.097300 |
| H | -5.084142 | -0.201896 | 0.958539  | H | 4.623190 | -5.149208 | 3.607437 |
| H | -4.189998 | 2.072332  | 2.346573  | H | 2.066655 | -4.005440 | 3.483842 |
| O | -1.535249 | 1.813116  | -0.954091 | O | 4.552050 | -0.720670 | 4.496150 |

## Li<sup>+</sup>(GBL)<sub>5</sub>

|                                           |                                 |
|-------------------------------------------|---------------------------------|
| E (PBE-D3/ma-def2-svp GAS_OPT) =          | -1537.1706459253                |
| E (PBE-D3/ma-def2-svp SMD_OPT) =          | -1537.2464714381                |
| $\Delta G_{\text{corr}}$ (ID-RR-HR GAS) = | <b>0.4226732600</b>             |
| E (DLPNO-CCSDT/cc-p(wC)VTZ GAS_OPT GAS) = | -1537.6926577839                |
| E (DLPNO-CCSDT/cc-p(wC)VTZ GAS_OPT SMD) = | -1537.7601866618                |
| E (DLPNO-CCSDT/cc-p(wC)VTZ SMD_OPT SMD) = | -1537.7609915785                |
| E (PBE-D3/ma-def2-tzvp GAS_OPT GAS) =     | -1538.8281023429                |
| E (PBE-D3/ma-def2-tzvp GAS_OPT SMD) =     | -1538.9006650168                |
| E (PBE-D3/ma-def2-tzvp GAS_OPT CPCM) =    | -1538.8937010835                |
| GAS_OPT                                   | SMD_OPT                         |
| H -1.740329 -1.290490 2.381078            | H -3.222373 0.021759 0.783693   |
| O -0.956591 -0.209309 0.785488            | O -1.877761 0.502937 -0.732521  |
| C -0.393220 -0.990888 -0.159661           | C -1.432654 -0.580076 -1.393814 |
| C 0.265537 -2.194905 0.481204             | C -1.302594 -1.755784 -0.454437 |
| C 0.376385 -1.792151 1.955475             | C -1.324778 -1.102431 0.931035  |
| C -0.783513 -0.798339 2.106864            | C -2.129203 0.173557 0.672649   |
| H 1.223268 -2.418374 -0.023663            | H -0.395658 -2.341970 -0.687122 |
| H -0.402487 -3.067241 0.310353            | H -2.184783 -2.410683 -0.627955 |
| H 1.343624 -1.283754 2.140203             | H -0.295880 -0.853449 1.259573  |
| H 0.295353 -2.639518 2.661629             | H -1.790426 -1.731243 1.711913  |
| H -0.593336 0.030194 2.814060             | H -1.823782 1.048507 1.275360   |
| O -0.466100 -0.698514 -1.345068           | O -1.209547 -0.526177 -2.600451 |
| Li 0.609044 -1.459391 -2.819094           | Li 0.005681 -1.538655 -3.755292 |

|   |           |           |           |   |           |           |           |
|---|-----------|-----------|-----------|---|-----------|-----------|-----------|
| H | 0.948907  | 3.076118  | -6.582870 | H | 0.335012  | 2.158165  | -8.447954 |
| O | 0.225936  | 1.291047  | -5.814569 | O | 0.420127  | 0.421562  | -7.304473 |
| C | 0.826578  | 0.286040  | -5.152626 | C | 0.163159  | 0.169324  | -6.010541 |
| C | 2.296613  | 0.224596  | -5.512146 | C | 0.242558  | 1.437734  | -5.193662 |
| C | 2.566615  | 1.612075  | -6.102012 | C | 0.194811  | 2.543646  | -6.253086 |
| C | 1.186098  | 1.998230  | -6.651925 | C | 0.766817  | 1.834868  | -7.483393 |
| H | 2.421317  | -0.590425 | -6.259273 | H | 1.199189  | 1.420863  | -4.624999 |
| H | 2.891195  | -0.049641 | -4.622179 | H | -0.575452 | 1.458073  | -4.450944 |
| H | 3.346584  | 1.625050  | -6.886151 | H | 0.781153  | 3.442918  | -5.987185 |
| H | 2.862610  | 2.310626  | -5.295507 | H | -0.852663 | 2.853791  | -6.440017 |
| H | 1.025714  | 1.662714  | -7.698290 | H | 1.873461  | 1.895580  | -7.539648 |
| O | 0.192077  | -0.446653 | -4.403824 | O | -0.087226 | -0.970539 | -5.625228 |
| H | 3.839806  | 0.598124  | 1.137508  | H | 2.485757  | -1.613560 | 0.607510  |
| O | 2.464984  | 0.106981  | -0.341979 | O | 1.715665  | -0.604480 | -1.044001 |
| C | 2.984380  | -0.184623 | -1.551636 | C | 2.397475  | -0.898840 | -2.170400 |
| C | 4.254406  | 0.605367  | -1.779002 | C | 3.867696  | -1.059482 | -1.868134 |
| C | 4.160090  | 1.732766  | -0.745544 | C | 4.016345  | -0.442615 | -0.474132 |
| C | 3.266832  | 1.116850  | 0.340394  | C | 2.614746  | -0.630058 | 0.109950  |
| H | 4.312194  | 0.943794  | -2.829388 | H | 4.482163  | -0.598579 | -2.663536 |
| H | 5.111422  | -0.080732 | -1.598787 | H | 4.082971  | -2.150929 | -1.876158 |
| H | 3.652467  | 2.606637  | -1.195600 | H | 4.252820  | 0.636301  | -0.553412 |
| H | 5.139145  | 2.055731  | -0.345554 | H | 4.789293  | -0.929227 | 0.148406  |
| H | 2.559308  | 1.833263  | 0.796084  | H | 2.294895  | 0.170780  | 0.799871  |
| O | 2.458995  | -1.011178 | -2.287918 | O | 1.826214  | -1.028998 | -3.246878 |
| H | -2.577961 | -5.914950 | -1.217665 | H | 1.792106  | -4.687200 | 0.049606  |
| O | -0.996858 | -4.649638 | -1.677419 | O | 1.195860  | -3.838596 | -1.754077 |
| C | -0.332661 | -4.393589 | -2.826545 | C | 0.384328  | -4.265960 | -2.742184 |
| C | -0.468519 | -5.564996 | -3.778721 | C | 0.274766  | -5.770315 | -2.716993 |
| C | -1.654816 | -6.348816 | -3.205782 | C | 0.779546  | -6.133732 | -1.316620 |
| C | -1.594159 | -5.981272 | -1.717684 | C | 1.739261  | -4.981886 | -1.014279 |
| H | 0.484130  | -6.138189 | -3.737164 | H | 0.941918  | -6.156071 | -3.519669 |
| H | -0.586488 | -5.208514 | -4.818943 | H | -0.755071 | -6.094887 | -2.955381 |
| H | -1.592657 | -7.440797 | -3.369558 | H | 1.284890  | -7.115739 | -1.266464 |
| H | -2.604971 | -5.992572 | -3.652155 | H | -0.059664 | -6.135012 | -0.592319 |
| H | -0.936204 | -6.658283 | -1.132930 | H | 2.764527  | -5.161754 | -1.398185 |
| O | 0.278879  | -3.350956 | -2.993034 | O | -0.144558 | -3.473333 | -3.516365 |
| H | -0.563228 | 3.895517  | 0.210453  | H | 1.339491  | 3.513473  | 1.171897  |
| O | 0.692546  | 2.757124  | -0.985797 | O | 2.176840  | 2.608419  | -0.501893 |
| C | 0.632814  | 2.381158  | -2.291151 | C | 1.823947  | 2.571942  | -1.816500 |
| C | -0.803667 | 2.425192  | -2.772920 | C | 0.349908  | 2.902322  | -1.955271 |
| C | -1.512576 | 3.274148  | -1.712882 | C | -0.003468 | 3.541256  | -0.610597 |
| C | -0.643652 | 3.028769  | -0.471862 | C | 1.009506  | 2.881061  | 0.327319  |
| H | -1.162219 | 1.373576  | -2.787649 | H | -0.191740 | 1.945420  | -2.113441 |
| H | -0.860275 | 2.799415  | -3.811223 | H | 0.174149  | 3.538354  | -2.842343 |
| H | -2.566647 | 2.984898  | -1.543408 | H | -1.046366 | 3.361131  | -0.289829 |
| H | -1.495060 | 4.346773  | -1.993943 | H | 0.164748  | 4.636292  | -0.644952 |
| H | -0.967075 | 2.134535  | 0.098881  | H | 0.645308  | 1.912017  | 0.730120  |
| O | 1.637114  | 2.050806  | -2.900123 | O | 2.634245  | 2.299620  | -2.685320 |

(GBL)<sub>6</sub>

|                                           |                                 |
|-------------------------------------------|---------------------------------|
| E (PBE-D3/ma-def2-svp GAS_OPT) =          | -1835.6931033583                |
| E (PBE-D3/ma-def2-svp SMD_OPT) =          | -1835.7295103332                |
| $\Delta$ Gcorr (ID-RR-HR GAS) =           | <b>0.5088087400</b>             |
| E (DLPNO-CCSDT/cc-p(wC)VTZ GAS_OPT GAS) = | -1836.2969961829                |
| E (DLPNO-CCSDT/cc-p(wC)VTZ GAS_OPT SMD) = | -1836.3220560268                |
| E (DLPNO-CCSDT/cc-p(wC)VTZ SMD_OPT SMD) = | -1836.3220017422                |
| E (PBE-D3/ma-def2-tzvp GAS_OPT GAS) =     | -1837.6767032445                |
| E (PBE-D3/ma-def2-tzvp GAS_OPT SMD) =     | -1837.7092163747                |
| E (PBE-D3/ma-def2-tzvp GAS_OPT CPCM) =    | -1837.7084988048                |
| <b>GAS_OPT</b>                            | <b>SMD_OPT</b>                  |
| H -3.354272 2.679582 1.062434             | H 0.816153 4.599100 -0.920322   |
| O -2.143059 4.358756 0.921705             | O 1.322789 2.611066 -0.558821   |
| C -0.875542 4.037714 0.561571             | C 0.766788 1.758564 -1.459519   |
| C -0.459490 2.739727 1.234288             | C -0.599253 2.268970 -1.871497  |
| C -1.529630 2.525647 2.310417             | C -0.948340 3.279834 -0.776746  |
| C -2.723228 3.299939 1.732407             | C 0.437374 3.745499 -0.320170   |
| H 0.582493 2.811624 1.598303              | H -1.311377 1.433534 -1.993015  |
| H -0.476283 1.950549 0.454675             | H -0.480884 2.749006 -2.867644  |
| H -1.207865 2.978577 3.270787             | H -1.485623 2.774979 0.050960   |
| H -1.771557 1.462013 2.502039             | H -1.570123 4.124443 -1.127958  |
| H -3.366985 3.783314 2.491334             | H 0.507740 4.003423 0.752906    |
| O -0.230488 4.735044 -0.204263            | O 1.358126 0.761078 -1.840217   |
| H -0.436036 2.128453 -2.349506            | H -5.663039 0.185974 -0.508049  |
| O -2.299482 2.277560 -1.469353            | O -5.009959 -0.126396 -2.459201 |
| C -3.565418 2.022252 -1.902893            | C -4.100556 0.803173 -2.856143  |
| C -3.593023 2.071481 -3.424898            | C -4.440587 2.147015 -2.239811  |
| C -2.113997 1.973350 -3.812654            | C -5.893469 1.974638 -1.788267  |
| C -1.419424 2.573942 -2.583540            | C -5.972473 0.466043 -1.536022  |
| H -4.052216 3.041571 -3.716186            | H -4.258078 2.965314 -2.961070  |
| H -4.243699 1.269486 -3.820760            | H -3.751845 2.290988 -1.379849  |
| H -1.856584 2.512705 -4.744261            | H -6.587811 2.264962 -2.602635  |
| H -1.809503 0.913877 -3.921965            | H -6.154062 2.558047 -0.885400  |
| H -1.315861 3.678662 -2.637983            | H -6.958680 0.015269 -1.752608  |
| O -4.475802 1.804790 -1.128723            | O -3.171721 0.508799 -3.589784  |
| H -0.057125 -1.468283 3.957944            | H 2.532144 -2.194970 1.874808   |
| O 0.781886 -2.167125 2.201831             | O 3.860440 -2.950004 0.461886   |
| C 0.588603 -3.315435 1.497548             | C 3.576752 -2.559221 -0.810351  |
| C 0.122523 -4.415061 2.438718             | C 2.074576 -2.451921 -0.991007  |
| C -0.331222 -3.654739 3.688229            | C 1.511931 -3.229739 0.201955   |

|   |           |           |           |   |           |           |           |
|---|-----------|-----------|-----------|---|-----------|-----------|-----------|
| C | 0.494206  | -2.361460 | 3.611706  | C | 2.633731  | -3.096834 | 1.236666  |
| H | 0.991870  | -5.082861 | 2.626484  | H | 1.778898  | -2.836924 | -1.985069 |
| H | -0.662170 | -5.020471 | 1.948889  | H | 1.817277  | -1.369662 | -0.978304 |
| H | -0.160381 | -4.202934 | 4.634298  | H | 1.363229  | -4.294390 | -0.068587 |
| H | -1.406620 | -3.404257 | 3.611800  | H | 0.555576  | -2.837499 | 0.593231  |
| H | 1.466872  | -2.433557 | 4.144644  | H | 2.758738  | -3.979451 | 1.891434  |
| O | 0.800829  | -3.372940 | 0.300950  | O | 4.461211  | -2.340675 | -1.620298 |
| H | 1.675443  | -0.674869 | 0.601138  | H | 2.093772  | 0.312035  | 3.877744  |
| O | 0.529267  | 0.122802  | -0.936506 | O | 0.232852  | -0.618809 | 3.839773  |
| C | 0.496302  | -0.683422 | -2.031206 | C | -0.206654 | -0.822166 | 2.571889  |
| C | 1.836249  | -1.379801 | -2.187355 | C | 0.220978  | 0.333527  | 1.687211  |
| C | 2.775098  | -0.545719 | -1.309502 | C | 0.608473  | 1.427389  | 2.685516  |
| C | 1.817189  | 0.015889  | -0.252533 | C | 1.024809  | 0.608079  | 3.911052  |
| H | 2.111353  | -1.457174 | -3.255609 | H | -0.596364 | 0.591482  | 0.989204  |
| H | 1.703638  | -2.407020 | -1.785100 | H | 1.096901  | -0.000213 | 1.092296  |
| H | 3.226375  | 0.285206  | -1.889949 | H | -0.266892 | 2.065235  | 2.924624  |
| H | 3.594040  | -1.132442 | -0.851934 | H | 1.428544  | 2.077184  | 2.329284  |
| H | 2.090400  | 1.023829  | 0.108258  | H | 0.802435  | 1.087871  | 4.882173  |
| O | -0.501932 | -0.780093 | -2.723651 | O | -0.839924 | -1.820198 | 2.267760  |
| H | 0.907587  | 4.562802  | -2.482502 | H | 4.174080  | 2.049352  | 0.443827  |
| O | 2.288793  | 3.273807  | -1.626378 | O | 3.595583  | 0.264526  | 1.342913  |
| C | 2.750094  | 3.785412  | -0.445934 | C | 4.545148  | -0.209817 | 2.193912  |
| C | 2.906000  | 5.291986  | -0.571348 | C | 5.923570  | 0.093158  | 1.639226  |
| C | 2.836063  | 5.538769  | -2.081645 | C | 5.655161  | 0.434721  | 0.170885  |
| C | 1.992772  | 4.346279  | -2.554484 | C | 4.218775  | 0.963000  | 0.221760  |
| H | 3.835274  | 5.626746  | -0.073926 | H | 6.608242  | -0.757798 | 1.814078  |
| H | 2.042033  | 5.740297  | -0.038081 | H | 6.320024  | 0.961554  | 2.210238  |
| H | 3.848834  | 5.501960  | -2.533606 | H | 5.706022  | -0.477995 | -0.455509 |
| H | 2.373451  | 6.506165  | -2.354688 | H | 6.353162  | 1.184017  | -0.247201 |
| H | 2.238023  | 3.983839  | -3.571086 | H | 3.604069  | 0.760627  | -0.673836 |
| O | 2.975718  | 3.074917  | 0.513231  | O | 4.242052  | -0.763819 | 3.237369  |
| H | -3.082758 | -3.708247 | -0.509414 | H | -4.402820 | -2.972348 | -1.195743 |
| O | -2.353070 | -2.688321 | 1.142028  | O | -3.826190 | -1.613852 | 0.272382  |
| C | -2.407183 | -1.374433 | 1.520609  | C | -2.833053 | -0.792888 | -0.145924 |
| C | -2.639100 | -0.507568 | 0.302754  | C | -1.886361 | -1.550450 | -1.057268 |
| C | -3.123936 | -1.489631 | -0.766520 | C | -2.230075 | -3.018341 | -0.793492 |
| C | -2.480378 | -2.802886 | -0.304520 | C | -3.691931 | -2.928188 | -0.344059 |
| H | -1.663002 | -0.056119 | 0.025789  | H | -0.838871 | -1.262720 | -0.852893 |
| H | -3.336920 | 0.319031  | 0.523781  | H | -2.114129 | -1.238968 | -2.099949 |
| H | -2.794626 | -1.215673 | -1.785653 | H | -1.604883 | -3.418316 | 0.027825  |
| H | -4.230206 | -1.563627 | -0.753878 | H | -2.108411 | -3.671134 | -1.677850 |
| H | -1.460564 | -2.943076 | -0.719355 | H | -3.986401 | -3.680478 | 0.410782  |
| O | -2.258765 | -1.042071 | 2.681801  | O | -2.797294 | 0.382707  | 0.184526  |

### Li<sup>+</sup>(GBL)<sub>6</sub>

|                                  |                  |
|----------------------------------|------------------|
| E (PBE-D3/ma-def2-svp GAS_OPT) = | -1843.1251675176 |
| E (PBE-D3/ma-def2-svp SMD_OPT) = | -1843.2007983958 |



|                                           |                                 |
|-------------------------------------------|---------------------------------|
| $\Delta G_{\text{corr}}$ (ID-RR-HR GAS) = | <b>0.5112249800</b>             |
| E (DLPNO-CCSDT/cc-p(wC)VTZ GAS_OPT GAS) = | -1843.7468538377                |
| E (DLPNO-CCSDT/cc-p(wC)VTZ GAS_OPT SMD) = | -1843.8147222833                |
| E (DLPNO-CCSDT/cc-p(wC)VTZ SMD_OPT SMD) = | -1843.8145091525                |
| E (PBE-D3/ma-def2-tzvp GAS_OPT GAS) =     | -1845.1124093926                |
| E (PBE-D3/ma-def2-tzvp GAS_OPT SMD) =     | -1845.1861272772                |
| E (PBE-D3/ma-def2-tzvp GAS_OPT CPCM) =    | -1845.1788989239                |
| <b>GAS_OPT</b>                            | <b>SMD_OPT</b>                  |
| H -2.236481 2.632738 -4.162972            | H -0.491176 5.272406 -2.648439  |
| O -1.299387 2.530356 -2.317147            | O -0.929993 3.740807 -1.303267  |
| C -0.015277 2.300556 -1.927574            | C -0.179367 2.637446 -1.522223  |
| C 0.730634 1.593217 -3.049647             | C 0.091352 2.477699 -3.001166   |
| C -0.168404 1.800975 -4.272862            | C -0.978843 3.363237 -3.646232  |
| C -1.551917 1.951169 -3.624632            | C -1.203103 4.424795 -2.567360  |
| H 0.798231 0.524613 -2.758994             | H 0.069020 1.411014 -3.284868   |
| H 1.755059 1.999896 -3.142700             | H 1.120378 2.856028 -3.186983   |
| H -0.139040 0.965939 -4.997974            | H -1.909161 2.782931 -3.813132  |
| H 0.109859 2.730068 -4.810635             | H -0.671289 3.810754 -4.609539  |
| H -2.054863 0.975889 -3.462425            | H -2.234178 4.819258 -2.511392  |
| O 0.392768 2.637114 -0.832929             | O 0.189490 1.937294 -0.588353   |
| Li 0.855516 -1.701255 -0.506689           | Li 0.626512 -0.154561 -0.703401 |
| H -4.661916 -1.368948 -1.552366           | H -4.288617 -2.200729 -3.198110 |
| O -2.913386 -0.262446 -1.367864           | O -3.176390 -0.535447 -2.617796 |
| C -1.891476 -0.923592 -0.791154           | C -2.236833 -0.849421 -1.703063 |
| C -2.404818 -1.870993 0.270771            | C -2.746544 -1.932171 -0.777209 |
| C -3.843004 -1.399822 0.511400            | C -4.260542 -1.905629 -1.009243 |
| C -4.187833 -0.694694 -0.808718           | C -4.354574 -1.387683 -2.445569 |
| H -1.745237 -1.831279 1.157130            | H -2.428184 -1.732347 0.263473  |
| H -2.340432 -2.898680 -0.148953           | H -2.290820 -2.890289 -1.109433 |
| H -3.860510 -0.675941 1.347625            | H -4.746278 -1.194388 -0.310498 |
| H -4.548893 -2.220560 0.737568            | H -4.746975 -2.891181 -0.890113 |
| H -4.817025 0.207953 -0.694230            | H -5.243006 -0.765330 -2.657345 |
| O -0.737896 -0.746009 -1.167966           | O -1.152368 -0.281273 -1.700387 |
| H 5.088781 1.769389 -0.198219             | H 6.196051 -0.315774 -1.983067  |
| O 3.494732 0.533157 -0.686334             | O 4.248133 -0.503659 -2.702205  |
| C 3.304760 -0.396709 -1.642756            | C 3.335884 -0.480158 -1.709182  |
| C 4.284792 -0.187041 -2.780544            | C 3.892992 -1.150826 -0.471570  |
| C 5.320062 0.776833 -2.187904             | C 5.076887 -1.955797 -1.014398  |
| C 4.509979 1.493670 -1.098801             | C 5.486159 -1.130796 -2.236470  |
| H 3.717690 0.255325 -3.628811             | H 3.107078 -1.731792 0.042157   |
| H 4.680839 -1.157362 -3.134558            | H 4.217264 -0.342321 0.219874   |
| H 5.747941 1.482831 -2.923768             | H 4.745381 -2.966854 -1.326708  |
| H 6.159269 0.212129 -1.734464             | H 5.908708 -2.069164 -0.294880  |

|   |           |           |           |   |           |           |           |
|---|-----------|-----------|-----------|---|-----------|-----------|-----------|
| H | 3.977042  | 2.394042  | -1.471159 | H | 5.892914  | -1.719567 | -3.078916 |
| O | 2.429554  | -1.245222 | -1.550693 | O | 2.242533  | 0.046903  | -1.872302 |
| H | 0.020381  | -7.257065 | 0.951064  | H | 0.891291  | -5.863935 | 0.930179  |
| O | -0.674144 | -5.406074 | 0.302435  | O | 0.312606  | -4.473970 | -0.512581 |
| C | 0.278801  | -4.453622 | 0.339533  | C | 0.409109  | -3.201175 | -0.060721 |
| C | 1.188012  | -4.662763 | 1.534684  | C | 0.079998  | -3.152125 | 1.416071  |
| C | 0.392092  | -5.634099 | 2.414372  | C | -0.661838 | -4.471205 | 1.651524  |
| C | -0.479089 | -6.364352 | 1.383207  | C | -0.042936 | -5.374345 | 0.583519  |
| H | 1.424800  | -3.685201 | 1.995436  | H | -0.462894 | -2.226133 | 1.678942  |
| H | 2.139624  | -5.100216 | 1.160900  | H | 1.050136  | -3.118651 | 1.958470  |
| H | -0.243803 | -5.071496 | 3.127421  | H | -1.749095 | -4.346128 | 1.468900  |
| H | 1.021467  | -6.330826 | 2.999039  | H | -0.529415 | -4.882164 | 2.669584  |
| H | -1.481345 | -6.657138 | 1.746560  | H | -0.724041 | -6.141269 | 0.171733  |
| O | 0.325539  | -3.576360 | -0.511629 | O | 0.735088  | -2.295021 | -0.815169 |
| H | 0.463466  | 0.521396  | 5.169232  | H | 3.303252  | 0.837590  | 4.414331  |
| O | 0.282855  | -0.541096 | 3.397692  | O | 1.682387  | 0.039476  | 3.378241  |
| C | 0.844165  | -0.406275 | 2.188586  | C | 1.573399  | 0.516760  | 2.122518  |
| C | 1.408501  | 0.981762  | 2.003691  | C | 2.032033  | 1.956705  | 2.068601  |
| C | 1.369323  | 1.577783  | 3.416854  | C | 2.001499  | 2.391986  | 3.536190  |
| C | 0.281423  | 0.738067  | 4.100658  | C | 2.226903  | 1.064921  | 4.266169  |
| H | 0.757955  | 1.520601  | 1.283613  | H | 1.400616  | 2.534134  | 1.369892  |
| H | 2.406491  | 0.923423  | 1.531953  | H | 3.064502  | 1.954959  | 1.653546  |
| H | 1.114555  | 2.653336  | 3.426564  | H | 1.008933  | 2.810766  | 3.795946  |
| H | 2.343817  | 1.445895  | 3.929025  | H | 2.772019  | 3.141253  | 3.796040  |
| H | -0.728312 | 1.174595  | 3.970487  | H | 1.700831  | 0.975648  | 5.234290  |
| O | 0.860231  | -1.349359 | 1.399236  | O | 1.182202  | -0.200442 | 1.211701  |
| H | -0.711205 | 5.023457  | 1.676395  | H | -0.790965 | 3.222027  | 1.633009  |
| O | -1.303950 | 3.082825  | 2.093677  | O | -1.451693 | 1.588408  | 2.746359  |
| C | -2.044247 | 2.191866  | 1.383501  | C | -2.156140 | 0.707655  | 1.990621  |
| C | -2.993910 | 2.932283  | 0.460088  | C | -2.948313 | 1.460564  | 0.935763  |
| C | -2.419010 | 4.350959  | 0.412028  | C | -2.960079 | 2.898916  | 1.459906  |
| C | -1.653930 | 4.448373  | 1.740691  | C | -1.659732 | 2.951077  | 2.266092  |
| H | -4.006459 | 2.889394  | 0.918184  | H | -3.944131 | 1.002373  | 0.791993  |
| H | -3.035382 | 2.423610  | -0.520201 | H | -2.387166 | 1.374654  | -0.017841 |
| H | -3.185736 | 5.142270  | 0.314949  | H | -3.832763 | 3.061274  | 2.123749  |
| H | -1.717602 | 4.435620  | -0.439413 | H | -2.978592 | 3.664065  | 0.662225  |
| H | -2.270978 | 4.860139  | 2.567400  | H | -1.695363 | 3.613331  | 3.150855  |
| O | -1.914117 | 0.990983  | 1.544034  | O | -2.108713 | -0.493479 | 2.197804  |

## H<sub>2</sub>O

|                                           |                     |
|-------------------------------------------|---------------------|
| E (PBE-D3/ma-def2-svp GAS_OPT) =          | -76.2921257766      |
| E (PBE-D3/ma-def2-svp SMD_OPT) =          | -76.3053257742      |
| $\Delta G_{\text{corr}}$ (ID-RR-HR GAS) = | <b>0.0030616600</b> |
| E (DLPNO-CCSDT/cc-p(wC)VTZ GAS_OPT GAS) = | -76.3422877820      |

|                                                                                                   |                                                                                                   |
|---------------------------------------------------------------------------------------------------|---------------------------------------------------------------------------------------------------|
| E (DLPNO-CCSDT/cc-p(wC)VTZ GAS_OPT SMD) =                                                         | -76.3560054732                                                                                    |
| E (DLPNO-CCSDT/cc-p(wC)VTZ SMD_OPT SMD) =                                                         | -76.3558980996                                                                                    |
| E (PBE-D3/ma-def2-tzvp GAS_OPT GAS) =                                                             | -76.3795881584                                                                                    |
| E (PBE-D3/ma-def2-tzvp GAS_OPT SMD) =                                                             | -76.3922213778                                                                                    |
| E (PBE-D3/ma-def2-tzvp GAS_OPT CPCM) =                                                            | -76.3913308078                                                                                    |
| GAS_OPT                                                                                           | SMD_OPT                                                                                           |
| O -0.083652 1.675603 -0.841151<br>H -0.040395 0.793723 -1.250306<br>H 0.728248 2.117674 -1.145094 | O -0.087856 1.677775 -0.837642<br>H -0.036941 0.795012 -1.251856<br>H 0.728998 2.114214 -1.147054 |

## (H<sub>2</sub>O)<sub>4</sub>

|                                                                                                                                   |                                                                                                                                    |
|-----------------------------------------------------------------------------------------------------------------------------------|------------------------------------------------------------------------------------------------------------------------------------|
| E (PBE-D3/ma-def2-svp GAS_OPT) =                                                                                                  | -305.2290002952                                                                                                                    |
| E (PBE-D3/ma-def2-svp SMD_OPT) =                                                                                                  | -305.2518032108                                                                                                                    |
| $\Delta G_{corr}$ (ID-RR-HR GAS) =                                                                                                | <b>0.0641993892</b>                                                                                                                |
| E (DLPNO-CCSDT/cc-p(wC)VTZ GAS_OPT GAS) =                                                                                         | -305.4119450751                                                                                                                    |
| E (DLPNO-CCSDT/cc-p(wC)VTZ GAS_OPT SMD) =                                                                                         | -305.4380807683                                                                                                                    |
| E (DLPNO-CCSDT/cc-p(wC)VTZ SMD_OPT SMD) =                                                                                         | -305.4388171705                                                                                                                    |
| E (PBE-D3/ma-def2-tzvp GAS_OPT GAS) =                                                                                             | -305.5738230130                                                                                                                    |
| E (PBE-D3/ma-def2-tzvp GAS_OPT SMD) =                                                                                             | -305.5949714827                                                                                                                    |
| E (PBE-D3/ma-def2-tzvp GAS_OPT CPCM) =                                                                                            | -305.5940726429                                                                                                                    |
| GAS_OPT                                                                                                                           | SMD_OPT                                                                                                                            |
| O 0.149225 1.772058 -0.636810<br>H 0.091873 0.929199 -1.185923<br>H 0.957900 2.223191 -0.933944<br>O -0.149006 -1.771663 0.638483 | O -0.175085 1.739333 -0.757914<br>H -0.308647 0.839812 -1.191127<br>H 0.595542 2.118429 -1.222857<br>O 0.144591 -1.741380 0.774657 |

|   |           |           |           |   |           |           |           |
|---|-----------|-----------|-----------|---|-----------|-----------|-----------|
| H | 0.566722  | -2.331939 | 0.984284  | H | 1.030461  | -2.152540 | 0.774688  |
| H | -0.121776 | -0.926987 | 1.187460  | H | 0.291892  | -0.836959 | 1.193489  |
| O | 0.012482  | -0.639634 | -1.773856 | O | -0.462173 | -0.783605 | -1.678417 |
| H | -0.747976 | -0.909772 | -2.316459 | H | -1.396213 | -1.002642 | -1.860764 |
| H | -0.043428 | -1.191377 | -0.932617 | H | -0.266125 | -1.241505 | -0.803298 |
| O | -0.016523 | 0.639041  | 1.773821  | O | 0.497248  | 0.778986  | 1.671745  |
| H | 0.064945  | 1.186489  | 0.931706  | H | -0.209432 | 1.042871  | 2.291752  |
| H | -0.764437 | 1.021395  | 2.263854  | H | 0.257940  | 1.239200  | 0.808048  |

## Li<sup>+</sup>(H<sub>2</sub>O)<sub>4</sub>

|                                           |                     |
|-------------------------------------------|---------------------|
| E (PBE-D3/ma-def2-svp GAS_OPT) =          | -312.5993006491     |
| E (PBE-D3/ma-def2-svp SMD_OPT) =          | -312.6983015054     |
| $\Delta G_{\text{corr}}$ (ID-RR-HR GAS) = | <b>0.0579799092</b> |
| E (DLPNO-CCSDT/cc-p(wC)VTZ GAS_OPT GAS) = | -312.8104575750     |
| E (DLPNO-CCSDT/cc-p(wC)VTZ GAS_OPT SMD) = | -312.9173065434     |
| E (DLPNO-CCSDT/cc-p(wC)VTZ SMD_OPT SMD) = | -312.9187598073     |
| E (PBE-D3/ma-def2-tzvp GAS_OPT GAS) =     | -312.9486412885     |
| E (PBE-D3/ma-def2-tzvp GAS_OPT SMD) =     | -313.0472788331     |
| E (PBE-D3/ma-def2-tzvp GAS_OPT CPCM) =    | -313.0456678392     |
| GAS_OPT                                   | SMD_OPT             |
| O                                         | O                   |
| H                                         | H                   |
| H                                         | H                   |
| O                                         | O                   |
| H                                         | H                   |
| H                                         | H                   |
| O                                         | O                   |
| H                                         | H                   |
| H                                         | H                   |
| O                                         | O                   |
| H                                         | H                   |
| Li                                        | Li                  |
| O                                         | O                   |
| H                                         | H                   |
| H                                         | H                   |

## Li<sup>+</sup> in water

|                                           |                |
|-------------------------------------------|----------------|
| E (PBE-D3/ma-def2-svp GAS_OPT) =          | -7.2519251623  |
| E (PBE-D3/ma-def2-svp SMD_OPT) =          | -7.3917970144  |
| $\Delta G_{\text{corr}}$ (ID-RR-HR GAS) = | -0.0127326619  |
| E (DLPNO-CCSDT/cc-p(wC)VTZ GAS_OPT GAS) = | -7.2736440090  |
| E (DLPNO-CCSDT/cc-p(wC)VTZ GAS_OPT SMD) = | -7.4171392254  |
| E (DLPNO-CCSDT/cc-p(wC)VTZ SMD_OPT SMD) = | -7.4171392254  |
| E (PBE-D3/ma-def2-tzvp GAS_OPT GAS) =     | -7.2566456293  |
| E (PBE-D3/ma-def2-tzvp GAS_OPT SMD) =     | -7.4001426722  |
| E (PBE-D3/ma-def2-tzvp GAS_OPT CPCM) =    | -7.4427403487  |
| GAS_OPT                                   | SMD_OPT        |
| Li 0.0 0.0 0.0                            | Li 0.0 0.0 0.0 |

## (H<sub>2</sub>O)<sub>5</sub>

|                                           |                     |
|-------------------------------------------|---------------------|
| E (PBE-D3/ma-def2-svp GAS_OPT) =          | -381.5369147408     |
| E (PBE-D3/ma-def2-svp SMD_OPT) =          | -381.5679720272     |
| $\Delta G_{\text{corr}}$ (ID-RR-HR GAS) = | <b>0.0866924000</b> |
| E (DLPNO-CCSDT/cc-p(wC)VTZ GAS_OPT GAS) = | -381.7662566160     |
| E (DLPNO-CCSDT/cc-p(wC)VTZ GAS_OPT SMD) = | -381.7969821942     |
| E (DLPNO-CCSDT/cc-p(wC)VTZ SMD_OPT SMD) = | -381.8000537734     |
| E (PBE-D3/ma-def2-tzvp GAS_OPT GAS) =     | -381.9679383247     |

|                                                                                                                                                                                                                                                                                                                                                                                                                                                                                                                        |                                                                                                                                                                                                                                                                                                                                                                                                                                                                                                                    |
|------------------------------------------------------------------------------------------------------------------------------------------------------------------------------------------------------------------------------------------------------------------------------------------------------------------------------------------------------------------------------------------------------------------------------------------------------------------------------------------------------------------------|--------------------------------------------------------------------------------------------------------------------------------------------------------------------------------------------------------------------------------------------------------------------------------------------------------------------------------------------------------------------------------------------------------------------------------------------------------------------------------------------------------------------|
| E (PBE-D3/ma-def2-tzvp GAS_OPT SMD) =                                                                                                                                                                                                                                                                                                                                                                                                                                                                                  | -381.9931864352                                                                                                                                                                                                                                                                                                                                                                                                                                                                                                    |
| E (PBE-D3/ma-def2-tzvp GAS_OPT CPCM) =                                                                                                                                                                                                                                                                                                                                                                                                                                                                                 | -381.9921451287                                                                                                                                                                                                                                                                                                                                                                                                                                                                                                    |
| GAS_OPT                                                                                                                                                                                                                                                                                                                                                                                                                                                                                                                | SMD_OPT                                                                                                                                                                                                                                                                                                                                                                                                                                                                                                            |
| O -1.655995 1.389299 -0.101931<br>H -1.189293 0.865845 -0.802393<br>H -1.518982 2.321088 -0.345654<br>O 1.909923 0.936158 -0.077237<br>H 2.809948 0.575042 -0.148042<br>H 1.379358 0.464980 -0.770399<br>O -0.262552 -2.015880 0.505066<br>H -1.065048 -2.501299 0.762064<br>H -0.183395 -1.234199 1.159363<br>O -0.050868 -0.397345 -1.517981<br>H -0.097594 -0.786023 -2.408084<br>H -0.187700 -1.158264 -0.849222<br>O -0.008624 0.232164 1.835153<br>H -0.702474 0.760699 1.361237<br>H 0.823296 0.547736 1.398061 | O -0.455794 2.208457 0.295140<br>H -1.246929 2.511047 -0.190717<br>H 0.150188 1.835103 -0.422630<br>O 1.166696 1.181297 -1.564466<br>H 2.094739 1.368612 -1.325457<br>H 1.097471 0.173658 -1.527963<br>O -0.267605 -2.078037 0.860590<br>H -1.074912 -2.612421 0.734791<br>H -0.597162 -1.224085 1.289019<br>O 0.915359 -1.480216 -1.463152<br>H 0.294852 -1.746603 -2.168352<br>H 0.440471 -1.725085 -0.605441<br>O -1.088928 0.215600 1.964005<br>H -0.850886 0.980384 1.347908<br>H -0.577560 0.392289 2.776725 |

## Li<sup>+</sup>(H<sub>2</sub>O)<sub>5</sub>

|                                           |                     |
|-------------------------------------------|---------------------|
| E (PBE-D3/ma-def2-svp GAS_OPT) =          | -388.9196432701     |
| E (PBE-D3/ma-def2-svp SMD_OPT) =          | -389.0128404189     |
| $\Delta G_{corr}$ (ID-RR-HR GAS) =        | <b>0.0815238592</b> |
| E (DLPNO-CCSDT/cc-p(wC)VTZ GAS_OPT GAS) = | -389.1764837508     |
| E (DLPNO-CCSDT/cc-p(wC)VTZ GAS_OPT SMD) = | -389.2808595015     |
| E (DLPNO-CCSDT/cc-p(wC)VTZ SMD_OPT SMD) = | -389.2771483304     |
| E (PBE-D3/ma-def2-tzvp GAS_OPT GAS) =     | -389.3546950101     |
| E (PBE-D3/ma-def2-tzvp GAS_OPT SMD) =     | -389.4502852187     |
| E (PBE-D3/ma-def2-tzvp GAS_OPT CPCM) =    | -389.4487858307     |
| GAS_OPT                                   | SMD_OPT             |

|    |           |           |           |    |           |           |           |
|----|-----------|-----------|-----------|----|-----------|-----------|-----------|
| O  | 1.067201  | -1.901946 | 1.362058  | O  | -0.883602 | -2.319535 | 0.706175  |
| H  | 0.368350  | -2.419237 | 1.801844  | H  | -1.755088 | -2.627456 | 0.391496  |
| H  | 1.891493  | -2.130313 | 1.827904  | H  | -0.330917 | -3.124515 | 0.701198  |
| O  | 2.262456  | -0.496870 | -1.140658 | O  | 1.503473  | -0.086532 | 1.136051  |
| H  | 2.583407  | 0.289412  | -1.618251 | H  | 1.591835  | 0.843392  | 0.792289  |
| H  | 2.775458  | -1.244155 | -1.497161 | H  | 1.521439  | 0.004396  | 2.107499  |
| O  | -1.135064 | -0.845217 | -0.576562 | O  | 0.463204  | -0.245679 | -1.696945 |
| H  | -1.531535 | -1.527051 | -1.145535 | H  | -0.168892 | -0.210149 | -2.441387 |
| H  | -1.771687 | -0.092608 | -0.549893 | H  | 1.213353  | -0.765114 | -2.047092 |
| O  | 0.393173  | 1.384953  | 0.525035  | O  | -1.380834 | 0.960925  | 0.449674  |
| H  | 0.866102  | 2.017517  | 1.092377  | H  | -1.731661 | 1.142853  | 1.343512  |
| H  | -0.515073 | 1.744990  | 0.391842  | H  | -2.146154 | 1.108040  | -0.140067 |
| Li | 0.694907  | -0.493375 | 0.043843  | Li | -0.158893 | -0.599754 | 0.175507  |
| O  | -2.327106 | 1.673930  | -0.152888 | O  | 1.073931  | 2.207683  | -0.359283 |
| H  | -2.600240 | 2.255323  | -0.889255 | H  | 1.038652  | 1.558426  | -1.102074 |
| H  | -3.021844 | 1.784651  | 0.525300  | H  | 0.150152  | 2.153021  | -0.016552 |

## MeOH

|                                           |                     |          |           |   |           |          |           |
|-------------------------------------------|---------------------|----------|-----------|---|-----------|----------|-----------|
| E (PBE-D3/ma-def2-svp GAS_OPT) =          | -115.5030080367     |          |           |   |           |          |           |
| E (PBE-D3/ma-def2-svp SMD_OPT) =          | -115.5120824906     |          |           |   |           |          |           |
| $\Delta G_{\text{corr}}$ (ID-RR-HR GAS) = | <b>0.0268633300</b> |          |           |   |           |          |           |
| E (DLPNO-CCSDT/cc-p(wC)VTZ GAS_OPT GAS) = | -115.5617284993     |          |           |   |           |          |           |
| E (DLPNO-CCSDT/cc-p(wC)VTZ GAS_OPT SMD) = | -115.5719838921     |          |           |   |           |          |           |
| E (DLPNO-CCSDT/cc-p(wC)VTZ SMD_OPT SMD) = | -115.5721769088     |          |           |   |           |          |           |
| E (PBE-D3/ma-def2-tzvp GAS_OPT GAS) =     | -115.6332033383     |          |           |   |           |          |           |
| E (PBE-D3/ma-def2-tzvp GAS_OPT SMD) =     | -115.6411190977     |          |           |   |           |          |           |
| E (PBE-D3/ma-def2-tzvp GAS_OPT CPCM) =    | -115.6410977397     |          |           |   |           |          |           |
| GAS_OPT                                   | SMD_OPT             |          |           |   |           |          |           |
| C                                         | 0.706967            | 1.762320 | -1.349702 | C | 0.706306  | 1.760385 | -1.357218 |
| O                                         | -0.290233           | 2.179645 | -0.430862 | O | -0.293760 | 2.182255 | -0.428898 |
| H                                         | 0.190658            | 1.498268 | -2.293520 | H | 0.193563  | 1.493905 | -2.302802 |
| H                                         | 1.264054            | 0.860440 | -1.002836 | H | 1.259673  | 0.864784 | -0.994860 |
| H                                         | 1.446031            | 2.565461 | -1.579538 | H | 1.441225  | 2.568439 | -1.573298 |
| H                                         | 0.140365            | 2.417351 | 0.408252  | H | 0.150834  | 2.413717 | 0.408869  |

**(MeOH)<sub>3</sub>**

|                                           |                                 |
|-------------------------------------------|---------------------------------|
| E (PBE-D3/ma-def2-svp GAS_OPT) =          | -346.5457860949                 |
| E (PBE-D3/ma-def2-svp SMD_OPT) =          | -346.5540708996                 |
| $\Delta G_{\text{corr}}$ (ID-RR-HR GAS) = | <b>0.1178318100</b>             |
| E (DLPNO-CCSDT/cc-p(wC)VTZ GAS_OPT GAS) = | -346.7129184523                 |
| E (DLPNO-CCSDT/cc-p(wC)VTZ GAS_OPT SMD) = | -346.7251199717                 |
| E (DLPNO-CCSDT/cc-p(wC)VTZ SMD_OPT SMD) = | -346.7266803922                 |
| E (PBE-D3/ma-def2-tzvp GAS_OPT GAS) =     | -346.9310502759                 |
| E (PBE-D3/ma-def2-tzvp GAS_OPT SMD) =     | -346.9371715367                 |
| E (PBE-D3/ma-def2-tzvp GAS_OPT CPCM) =    | -346.9392281605                 |
| <b>GAS_OPT</b>                            | <b>SMD_OPT</b>                  |
| C 1.344819 0.510981 -2.190878             | C 0.873282 -0.228112 -2.101421  |
| O 0.119977 0.533892 -1.475980             | O 1.228082 -1.020284 -0.966304  |
| H 1.177891 -0.039231 -3.138189            | H -0.044697 0.376242 -1.922298  |
| H 2.156454 -0.006478 -1.628356            | H 0.673562 -0.914338 -2.948360  |
| H 1.692436 1.537218 -2.447936             | H 1.698373 0.458676 -2.392525   |
| H 0.246363 0.996915 -0.600949             | H 1.468836 -0.408899 -0.214680  |
| C -2.261120 -1.650162 0.093406            | C -2.064803 -1.055912 0.524860  |
| O -0.902636 -1.262901 0.234976            | O -0.740748 -1.444664 0.895797  |
| H -2.387170 -2.432785 -0.688442           | H -2.091398 -0.041029 0.067837  |
| H -2.921977 -0.789515 -0.158758           | H -2.684542 -1.038060 1.443287  |
| H -2.597511 -2.075179 1.059975            | H -2.515276 -1.779348 -0.189718 |
| H -0.584420 -0.825895 -0.604172           | H -0.180593 -1.518523 0.074825  |
| C 1.093343 1.055774 2.119000              | C 0.773542 1.798846 1.250504    |
| O 0.045879 1.069037 1.163039              | O 1.189814 0.434492 1.339594    |
| H 1.574220 2.054425 2.114599              | H 1.679364 2.423478 1.119974    |
| H 1.871695 0.291949 1.887457              | H 0.251350 2.124690 2.176929    |
| H 0.712236 0.864774 3.147761              | H 0.099712 1.976200 0.382372    |
| H -0.380479 0.167182 1.113450             | H 0.386142 -0.143456 1.459327   |

**Li<sup>+</sup>(MeOH)<sub>3</sub>**



|                                           |                                 |
|-------------------------------------------|---------------------------------|
| E (PBE-D3/ma-def2-svp GAS_OPT) =          | -353.9189050673                 |
| E (PBE-D3/ma-def2-svp SMD_OPT) =          | -354.0055267312                 |
| $\Delta G_{\text{corr}}$ (ID-RR-HR GAS) = | <b>0.1175581400</b>             |
| E (DLPNO-CCSDT/cc-p(wC)VTZ GAS_OPT GAS) = | -354.1103906105                 |
| E (DLPNO-CCSDT/cc-p(wC)VTZ GAS_OPT SMD) = | -354.1992896646                 |
| E (DLPNO-CCSDT/cc-p(wC)VTZ SMD_OPT SMD) = | -354.1997650276                 |
| E (PBE-D3/ma-def2-tzvp GAS_OPT GAS) =     | -354.3073470861                 |
| E (PBE-D3/ma-def2-tzvp GAS_OPT SMD) =     | -354.3933147708                 |
| E (PBE-D3/ma-def2-tzvp GAS_OPT CPCM) =    | -354.3951076954                 |
| <b>GAS_OPT</b>                            | <b>SMD_OPT</b>                  |
| Li -0.011339 -0.472753 0.056642           | Li 0.078187 -0.364687 -0.449487 |
| C 2.904700 0.097518 -0.357786             | C 2.781641 0.069224 0.750651    |
| O 1.841623 -0.426895 0.469083             | O 1.937889 -0.014783 -0.406979  |
| H 2.433714 0.520512 -1.264267             | H 3.065519 1.121551 0.965300    |
| H 3.607604 -0.706293 -0.656685            | H 3.701763 -0.537159 0.615734   |
| H 3.454666 0.903409 0.168801              | H 2.215148 -0.335380 1.610618   |
| H 2.228008 -0.803207 1.280887             | H 2.442429 0.276488 -1.190290   |
| C -1.740892 -0.005046 -2.346581           | C -2.329641 -0.775341 -2.166648 |
| O -0.588955 -0.637187 -1.744548           | O -0.916442 -0.910348 -1.957276 |
| H -1.440318 0.632014 -3.202756            | H -2.759172 -0.308170 -1.260014 |
| H -2.203930 0.633471 -1.571753            | H -2.806219 -1.766428 -2.320735 |
| H -2.479183 -0.762118 -2.680184           | H -2.542590 -0.124331 -3.040775 |
| H -0.157679 -1.206793 -2.407474           | H -0.513916 -1.316970 -2.748227 |
| C -1.141362 0.609827 2.616319             | C -0.559453 1.140895 2.054137   |
| O -1.291540 -0.208118 1.434333            | O -0.848699 0.067210 1.147209   |
| H -1.176302 -0.010554 3.534715            | H -0.125694 0.760115 3.003021   |
| H -1.926234 1.391745 2.658970             | H -1.475422 1.726239 2.280462   |
| H -0.152681 1.100248 2.549461             | H 0.173884 1.808491 1.563201    |
| H -2.159902 -0.649777 1.462824            | H -1.519214 -0.516614 1.550095  |

## Li<sup>+</sup> in methanol

|                                  |               |
|----------------------------------|---------------|
| E (PBE-D3/ma-def2-svp GAS_OPT) = | -7.2519251623 |
|----------------------------------|---------------|

|                                           |                |
|-------------------------------------------|----------------|
| E (PBE-D3/ma-def2-svp SMD_OPT) =          | -7.3917970144  |
| $\Delta G_{\text{corr}}$ (ID-RR-HR GAS) = | -0.0127326619  |
| E (DLPNO-CCSDT/cc-p(wC)VTZ GAS_OPT GAS) = | -7.2736440090  |
| E (DLPNO-CCSDT/cc-p(wC)VTZ GAS_OPT SMD) = | -7.4145374283  |
| E (DLPNO-CCSDT/cc-p(wC)VTZ SMD_OPT SMD) = | -7.4145374283  |
| E (PBE-D3/ma-def2-tzvp GAS_OPT GAS) =     | -7.2566456293  |
| E (PBE-D3/ma-def2-tzvp GAS_OPT SMD) =     | -7.3964434016  |
| E (PBE-D3/ma-def2-tzvp GAS_OPT CPCM) =    | -7.4393090945  |
| GAS_OPT                                   | SMD_OPT        |
| Li 0.0 0.0 0.0                            | Li 0.0 0.0 0.0 |

### (MeOH)<sub>4</sub>

|                                           |                     |
|-------------------------------------------|---------------------|
| E (PBE-D3/ma-def2-svp GAS_OPT) =          | -462.0778869072     |
| E (PBE-D3/ma-def2-svp SMD_OPT) =          | -462.0867950301     |
| $\Delta G_{\text{corr}}$ (ID-RR-HR GAS) = | <b>0.1645356200</b> |
| E (DLPNO-CCSDT/cc-p(wC)VTZ GAS_OPT GAS) = | -462.2955145584     |
| E (DLPNO-CCSDT/cc-p(wC)VTZ GAS_OPT SMD) = | -462.3086470814     |
| E (DLPNO-CCSDT/cc-p(wC)VTZ SMD_OPT SMD) = | -462.3106864603     |
| E (PBE-D3/ma-def2-tzvp GAS_OPT GAS) =     | -462.5890097990     |
| E (PBE-D3/ma-def2-tzvp GAS_OPT SMD) =     | -462.5945255833     |
| E (PBE-D3/ma-def2-tzvp GAS_OPT CPCM) =    | -462.5978008157     |

| GAS_OPT |           |           |           | SMD_OPT |           |           |           |
|---------|-----------|-----------|-----------|---------|-----------|-----------|-----------|
| C       | 0.744946  | -1.860554 | -2.215677 | C       | 1.592976  | -0.764949 | -2.236786 |
| O       | 1.073793  | -0.892831 | -1.231125 | O       | 0.280136  | -1.138911 | -1.813749 |
| H       | 1.069448  | -1.476228 | -3.203518 | H       | 2.042864  | 0.009886  | -1.576554 |
| H       | -0.350145 | -2.060964 | -2.261920 | H       | 1.521116  | -0.349218 | -3.261690 |
| H       | 1.270698  | -2.824099 | -2.031946 | H       | 2.272263  | -1.645204 | -2.263701 |
| H       | 0.768687  | -1.214299 | -0.320801 | H       | 0.332623  | -1.514931 | -0.876760 |
| C       | 0.859824  | 2.540297  | -1.280487 | C       | -0.683340 | 2.048160  | -1.170843 |
| O       | -0.066528 | 1.475719  | -1.129925 | O       | -1.411252 | 0.818699  | -1.216210 |
| H       | 1.265302  | 2.584637  | -2.315975 | H       | -1.352401 | 2.834036  | -0.766972 |
| H       | 1.715266  | 2.459340  | -0.571165 | H       | -0.351767 | 2.358010  | -2.186268 |
| H       | 0.330777  | 3.493341  | -1.078804 | H       | 0.212318  | 1.980139  | -0.513004 |
| H       | 0.402398  | 0.592032  | -1.285714 | H       | -0.787951 | 0.098173  | -1.556407 |
| C       | -2.538294 | 0.989065  | 1.224653  | C       | -1.635600 | 0.723529  | 2.223857  |
| O       | -1.124773 | 0.865033  | 1.200027  | O       | -1.780247 | -0.252780 | 1.190454  |
| H       | -2.855560 | 2.053601  | 1.155878  | H       | -0.664742 | 1.264020  | 2.159336  |
| H       | -2.906607 | 0.583597  | 2.188397  | H       | -1.679252 | 0.202290  | 3.201033  |
| H       | -3.026635 | 0.422784  | 0.398585  | H       | -2.459421 | 1.469939  | 2.188938  |
| H       | -0.766962 | 1.211192  | 0.318275  | H       | -1.739768 | 0.211007  | 0.292879  |
| C       | 0.939329  | -1.664132 | 2.276062  | C       | 1.401371  | -1.380609 | 1.464281  |
| O       | 0.103461  | -1.461250 | 1.147273  | O       | 0.270855  | -1.876831 | 0.743652  |
| H       | 1.537326  | -2.581903 | 2.105976  | H       | 2.292804  | -1.963307 | 1.157360  |
| H       | 0.342928  | -1.809410 | 3.204428  | H       | 1.264923  | -1.501532 | 2.561474  |
| H       | 1.642095  | -0.815057 | 2.439273  | H       | 1.596015  | -0.305753 | 1.248987  |
| H       | -0.430773 | -0.609915 | 1.268230  | H       | -0.534524 | -1.323864 | 1.006691  |

## Li<sup>+</sup>(MeOH)<sub>4</sub>

|                                           |                     |
|-------------------------------------------|---------------------|
| E (PBE-D3/ma-def2-svp GAS_OPT) =          | -469.4530716512     |
| E (PBE-D3/ma-def2-svp SMD_OPT) =          | -469.5364995368     |
| $\Delta G_{\text{corr}}$ (ID-RR-HR GAS) = | <b>0.1632704800</b> |
| E (DLPNO-CCSDT/cc-p(wC)VTZ GAS_OPT GAS) = | -469.7021210318     |
| E (DLPNO-CCSDT/cc-p(wC)VTZ GAS_OPT SMD) = | -469.7872767126     |
| E (DLPNO-CCSDT/cc-p(wC)VTZ SMD_OPT SMD) = | -469.7887479127     |
| E (PBE-D3/ma-def2-tzvp GAS_OPT GAS) =     | -469.9693239943     |
| E (PBE-D3/ma-def2-tzvp GAS_OPT SMD) =     | -470.0508611175     |
| E (PBE-D3/ma-def2-tzvp GAS_OPT CPCM) =    | -470.0479381207     |

| GAS_OPT |           |           |           | SMD_OPT |           |           |           |
|---------|-----------|-----------|-----------|---------|-----------|-----------|-----------|
| Li      | 0.029893  | -0.266851 | -0.367414 | Li      | -0.233531 | 0.025859  | -0.528562 |
| C       | 1.637168  | -2.848779 | -0.380433 | C       | 2.285054  | -0.240037 | 1.059096  |
| O       | 1.038521  | -1.762829 | -1.109333 | O       | 1.205264  | -0.897149 | 0.387800  |
| H       | 2.719870  | -2.938264 | -0.607075 | H       | 3.226817  | -0.300639 | 0.472441  |
| H       | 1.132850  | -3.812345 | -0.602635 | H       | 2.460377  | -0.678563 | 2.065027  |
| H       | 1.517359  | -2.621559 | 0.695308  | H       | 2.009685  | 0.825410  | 1.180110  |
| H       | 1.156247  | -1.913098 | -2.064259 | H       | 1.444623  | -1.830799 | 0.237992  |
| C       | 0.416101  | 2.389631  | -1.797438 | C       | 1.859037  | 0.849706  | -2.460757 |
| O       | -0.316438 | 1.159339  | -1.655055 | O       | 0.487778  | 0.983717  | -2.062524 |
| H       | -0.260766 | 3.267663  | -1.752282 | H       | 2.156932  | -0.201117 | -2.284824 |
| H       | 0.990428  | 2.411155  | -2.746827 | H       | 2.520983  | 1.518491  | -1.869427 |
| H       | 1.122169  | 2.442681  | -0.948549 | H       | 1.983989  | 1.076756  | -3.540573 |
| H       | -0.985230 | 1.100833  | -2.360431 | H       | 0.189015  | 1.888320  | -2.275894 |
| C       | -2.849377 | 0.025635  | 0.585234  | C       | -2.525738 | -1.698721 | 0.004199  |
| O       | -1.731563 | -0.820415 | 0.265104  | O       | -1.599061 | -1.284897 | -1.009590 |
| H       | -3.113048 | -0.041845 | 1.661533  | H       | -3.294089 | -0.919033 | 0.196354  |
| H       | -3.738168 | -0.229915 | -0.028286 | H       | -1.948935 | -1.875449 | 0.932239  |
| H       | -2.546381 | 1.063650  | 0.353333  | H       | -3.032027 | -2.645279 | -0.279562 |
| H       | -1.977471 | -1.749855 | 0.419541  | H       | -2.080108 | -1.196960 | -1.854672 |
| C       | 0.719954  | 0.971999  | 2.335096  | C       | -1.004746 | 0.947626  | 2.236201  |
| O       | 1.153150  | 0.405977  | 1.085539  | O       | -0.904345 | 1.240159  | 0.837911  |
| H       | 1.141397  | 0.415039  | 3.197212  | H       | -2.050652 | 0.714372  | 2.529025  |
| H       | -0.381595 | 0.886028  | 2.365217  | H       | -0.637501 | 1.797518  | 2.850496  |
| H       | 0.999117  | 2.043464  | 2.411991  | H       | -0.371396 | 0.064078  | 2.441064  |
| H       | 2.125814  | 0.422663  | 1.044909  | H       | -1.496757 | 1.986865  | 0.628728  |

## Py

|                                           |                     |
|-------------------------------------------|---------------------|
| E (PBE-D3/ma-def2-svp GAS_OPT) =          | -247.8083843741     |
| E (PBE-D3/ma-def2-svp SMD_OPT) =          | -247.8182773601     |
| $\Delta G_{\text{corr}}$ (ID-RR-HR GAS) = | <b>0.0580347592</b> |
| E (DLPNO-CCSDT/cc-p(wC)VTZ GAS_OPT GAS) = | -247.8475501993     |
| E (DLPNO-CCSDT/cc-p(wC)VTZ GAS_OPT SMD) = | -247.8560500167     |
| E (DLPNO-CCSDT/cc-p(wC)VTZ SMD_OPT SMD) = | -247.8560499457     |
| E (PBE-D3/ma-def2-tzvp GAS_OPT GAS) =     | -248.0677900702     |
| E (PBE-D3/ma-def2-tzvp GAS_OPT SMD) =     | -248.0775520951     |

|                                        |                                |
|----------------------------------------|--------------------------------|
| E (PBE-D3/ma-def2-tzvp GAS_OPT CPCM) = | -248.0749123824                |
| GAS_OPT                                | SMD_OPT                        |
| C -2.455164 2.402807 -2.384806         | C -2.455462 2.401935 -2.383719 |
| C -3.765914 2.246837 -1.909749         | C -3.766918 2.246483 -1.909119 |
| C -3.966822 1.502266 -0.734635         | C -3.970743 1.502903 -0.734912 |
| N -2.970827 0.929319 -0.038055         | N -2.970727 0.929554 -0.038263 |
| C -1.719752 1.085438 -0.502584         | C -1.715836 1.084609 -0.502094 |
| C -1.406760 1.809282 -1.666151         | C -1.406138 1.808485 -1.665490 |
| H -2.253877 2.978508 -3.301700         | H -2.254169 2.978014 -3.300417 |
| H -4.622305 2.692920 -2.437590         | H -4.623402 2.692594 -2.436707 |
| H -4.986401 1.360554 -0.333772         | H -4.991459 1.363285 -0.337262 |
| H -0.917481 0.605793 0.086164          | H -0.911188 0.606721 0.084064  |
| H -0.361535 1.902646 -1.997526         | H -0.360796 1.901785 -1.996485 |

**(Py)<sub>3</sub>**

|                                           |                                |
|-------------------------------------------|--------------------------------|
| E (PBE-D3/ma-def2-svp GAS_OPT) =          | -743.4452750476                |
| E (PBE-D3/ma-def2-svp SMD_OPT) =          | -743.4664301858                |
| $\Delta G_{corr}$ (ID-RR-HR GAS) =        | <b>0.2155179000</b>            |
| E (DLPNO-CCSDT/cc-p(wC)VTZ GAS_OPT GAS) = | -743.5630182006                |
| E (DLPNO-CCSDT/cc-p(wC)VTZ GAS_OPT SMD) = | -743.5799836236                |
| E (DLPNO-CCSDT/cc-p(wC)VTZ SMD_OPT SMD) = | -743.5799092055                |
| E (PBE-D3/ma-def2-tzvp GAS_OPT GAS) =     | -744.2203808864                |
| E (PBE-D3/ma-def2-tzvp GAS_OPT SMD) =     | -744.2410756614                |
| E (PBE-D3/ma-def2-tzvp GAS_OPT CPCM) =    | -744.2341680634                |
| GAS_OPT                                   | SMD_OPT                        |
| C -2.664871 2.261744 -2.426662            | C -2.707317 2.312571 -2.444579 |
| C -3.641986 2.413020 -1.430354            | C -3.703911 2.462252 -1.467649 |
| C -3.392100 1.866462 -0.160595            | C -3.482352 1.911089 -0.194668 |
| N -2.264010 1.204749 0.151020             | N -2.359065 1.246548 0.137870  |
| C -1.335271 1.066169 -0.812036            | C -1.409625 1.110044 -0.806612 |
| C -1.483161 1.573523 -2.114215            | C -1.533276 1.620751 -2.108864 |
| H -2.822809 2.675250 -3.435019            | H -2.843834 2.728444 -3.454999 |

|   |           |           |           |   |           |           |           |
|---|-----------|-----------|-----------|---|-----------|-----------|-----------|
| H | -4.584558 | 2.944980  | -1.629104 | H | -4.641113 | 2.997280  | -1.682648 |
| H | -4.139120 | 1.966282  | 0.646675  | H | -4.248443 | 2.009711  | 0.594385  |
| H | -0.418178 | 0.519695  | -0.530790 | H | -0.498108 | 0.561351  | -0.509542 |
| H | -0.679774 | 1.422394  | -2.851674 | H | -0.719448 | 1.472286  | -2.834944 |
| C | 2.366505  | -0.639390 | -0.155400 | C | 2.475601  | -0.684855 | -0.161904 |
| C | 2.614026  | 0.700890  | -0.485927 | C | 2.710819  | 0.660194  | -0.483670 |
| C | 2.238933  | 1.155986  | -1.761753 | C | 2.289255  | 1.132543  | -1.737769 |
| N | 1.654004  | 0.374744  | -2.686205 | N | 1.666549  | 0.360268  | -2.648713 |
| C | 1.428581  | -0.910902 | -2.359904 | C | 1.445970  | -0.930131 | -2.329709 |
| C | 1.762974  | -1.467155 | -1.113833 | C | 1.830086  | -1.499323 | -1.104493 |
| H | 2.627696  | -1.034310 | 0.838286  | H | 2.787962  | -1.091462 | 0.812143  |
| H | 3.081782  | 1.390216  | 0.233032  | H | 3.212899  | 1.338261  | 0.222464  |
| H | 2.411726  | 2.208171  | -2.050217 | H | 2.458089  | 2.186937  | -2.018964 |
| H | 0.943474  | -1.531956 | -3.133746 | H | 0.928747  | -1.543614 | -3.088373 |
| H | 1.536103  | -2.519580 | -0.887305 | H | 1.617880  | -2.558006 | -0.893732 |
| C | 0.466041  | -0.586787 | 3.199386  | C | 0.482185  | -0.571812 | 3.148885  |
| C | 1.367585  | -1.629820 | 3.464727  | C | 1.389331  | -1.602748 | 3.439164  |
| C | 1.285575  | -2.798478 | 2.687328  | C | 1.283355  | -2.808870 | 2.726332  |
| N | 0.388233  | -2.972874 | 1.701273  | N | 0.355555  | -3.027414 | 1.774694  |
| C | -0.471918 | -1.966536 | 1.463694  | C | -0.509478 | -2.030478 | 1.505592  |
| C | -0.479214 | -0.755150 | 2.176699  | C | -0.490824 | -0.788347 | 2.161248  |
| H | 0.500395  | 0.347102  | 3.782304  | H | 0.533749  | 0.389498  | 3.683997  |
| H | 2.125068  | -1.545191 | 4.258910  | H | 2.170226  | -1.480700 | 4.204766  |
| H | 1.981390  | -3.637427 | 2.868418  | H | 1.983033  | -3.637849 | 2.932530  |
| H | -1.196922 | -2.125755 | 0.645776  | H | -1.256313 | -2.228623 | 0.716400  |
| H | -1.206196 | 0.029934  | 1.907206  | H | -1.224217 | -0.012464 | 1.884875  |

### Li<sup>+</sup>(Py)<sub>3</sub>

|                                           |                     |
|-------------------------------------------|---------------------|
| E (PBE-D3/ma-def2-svp GAS_OPT) =          | -750.8627292733     |
| E (PBE-D3/ma-def2-svp SMD_OPT) =          | -750.9355072366     |
| $\Delta G_{\text{corr}}$ (ID-RR-HR GAS) = | <b>0.2187829900</b> |
| E (DLPNO-CCSDT/cc-p(wC)VTZ GAS_OPT GAS) = | -750.9953231314     |
| E (DLPNO-CCSDT/cc-p(wC)VTZ GAS_OPT SMD) = | -751.0621242554     |
| E (DLPNO-CCSDT/cc-p(wC)VTZ SMD_OPT SMD) = | -751.0622126182     |
| E (PBE-D3/ma-def2-tzvp GAS_OPT GAS) =     | -751.6398922433     |
| E (PBE-D3/ma-def2-tzvp GAS_OPT SMD) =     | -751.7134014280     |
| E (PBE-D3/ma-def2-tzvp GAS_OPT CPCM) =    | -751.7042731010     |

| GAS_OPT |           |           |           | SMD_OPT |           |           |           |
|---------|-----------|-----------|-----------|---------|-----------|-----------|-----------|
| C       | 3.792200  | 0.645611  | -2.900545 | C       | 3.803401  | 0.639056  | -2.879245 |
| C       | 3.530213  | -0.610086 | -2.331886 | C       | 3.547246  | -0.608239 | -2.289559 |
| C       | 2.413904  | -0.748070 | -1.496547 | C       | 2.418488  | -0.743687 | -1.469919 |
| N       | 1.577443  | 0.274728  | -1.210641 | N       | 1.566401  | 0.274688  | -1.221714 |
| C       | 1.838138  | 1.481266  | -1.761842 | C       | 1.818743  | 1.473010  | -1.792079 |
| C       | 2.928690  | 1.712816  | -2.610362 | C       | 2.921771  | 1.701024  | -2.626059 |
| H       | 4.659539  | 0.790834  | -3.562341 | H       | 4.680288  | 0.782148  | -3.529353 |
| H       | 4.180167  | -1.474438 | -2.530018 | H       | 4.210051  | -1.469221 | -2.459378 |
| H       | 2.178051  | -1.720736 | -1.032585 | H       | 2.186233  | -1.709225 | -0.990101 |
| H       | 1.138998  | 2.297289  | -1.512306 | H       | 1.104964  | 2.284370  | -1.571488 |
| H       | 3.093935  | 2.713739  | -3.034220 | H       | 3.081816  | 2.696133  | -3.066056 |
| Li      | -0.001540 | 0.005515  | -0.004867 | Li      | -0.029187 | 0.015747  | -0.037417 |
| C       | -1.499943 | 3.579775  | 2.854594  | C       | -1.496190 | 3.580808  | 2.842861  |
| C       | -0.138041 | 3.429100  | 2.552412  | C       | -0.134290 | 3.413877  | 2.548857  |
| C       | 0.250305  | 2.374980  | 1.715187  | C       | 0.245491  | 2.363567  | 1.702206  |
| N       | -0.627458 | 1.493410  | 1.186117  | N       | -0.642360 | 1.503422  | 1.157498  |
| C       | -1.937362 | 1.645362  | 1.483459  | C       | -1.951886 | 1.669387  | 1.444536  |
| C       | -2.418434 | 2.670212  | 2.308833  | C       | -2.423832 | 2.691446  | 2.279361  |
| H       | -1.841691 | 4.396823  | 3.508034  | H       | -1.830877 | 4.394780  | 3.504280  |
| H       | 0.617338  | 4.117140  | 2.958376  | H       | 0.629027  | 4.086332  | 2.966709  |
| H       | 1.312465  | 2.226772  | 1.456680  | H       | 1.307026  | 2.202556  | 1.449745  |
| H       | -2.631139 | 0.912746  | 1.037482  | H       | -2.652437 | 0.952132  | 0.984979  |
| H       | -3.495008 | 2.750337  | 2.517098  | H       | -3.501117 | 2.782860  | 2.480766  |
| C       | -2.287599 | -4.233271 | 0.052632  | C       | -2.270826 | -4.240089 | 0.082538  |
| C       | -1.714229 | -3.748103 | -1.132554 | C       | -1.730910 | -3.751463 | -1.116989 |
| C       | -1.059088 | -2.510027 | -1.102502 | C       | -1.088188 | -2.506081 | -1.105233 |
| N       | -0.955743 | -1.758859 | 0.016656  | N       | -0.966688 | -1.754466 | 0.010665  |
| C       | -1.512317 | -2.233288 | 1.153584  | C       | -1.489407 | -2.229980 | 1.161941  |
| C       | -2.184295 | -3.460918 | 1.219491  | C       | -2.147829 | -3.464377 | 1.245398  |
| H       | -2.809112 | -5.202382 | 0.066697  | H       | -2.781252 | -5.215135 | 0.111015  |
| H       | -1.771850 | -4.318260 | -2.070851 | H       | -1.802755 | -4.324004 | -2.053189 |
| H       | -0.596965 | -2.098218 | -2.015637 | H       | -0.652285 | -2.090882 | -2.029357 |
| H       | -1.412409 | -1.600118 | 2.051407  | H       | -1.373951 | -1.594045 | 2.055639  |
| H       | -2.617158 | -3.801684 | 2.170968  | H       | -2.554679 | -3.806449 | 2.208141  |

## Li<sup>+</sup> in pyridine

|                                           |               |
|-------------------------------------------|---------------|
| E (PBE-D3/ma-def2-svp GAS_OPT) =          | -7.2519251623 |
| E (PBE-D3/ma-def2-svp SMD_OPT) =          | -7.3917970144 |
| $\Delta G_{\text{corr}}$ (ID-RR-HR GAS) = | -0.0127326619 |
| E (DLPNO-CCSDT/cc-p(wC)VTZ GAS_OPT GAS) = | -7.2736440090 |
| E (DLPNO-CCSDT/cc-p(wC)VTZ GAS_OPT SMD) = | -7.4077945060 |

|                                           |                |
|-------------------------------------------|----------------|
| E (DLPNO-CCSDT/cc-p(wC)VTZ SMD_OPT SMD) = | -7.4077945060  |
| E (PBE-D3/ma-def2-tzvp GAS_OPT GAS) =     | -7.2566456293  |
| E (PBE-D3/ma-def2-tzvp GAS_OPT SMD) =     | -7.3892671107  |
| E (PBE-D3/ma-def2-tzvp GAS_OPT CPCM) =    | -7.4300089998  |
| GAS_OPT                                   | SMD_OPT        |
| Li 0.0 0.0 0.0                            | Li 0.0 0.0 0.0 |

### (Py)<sub>4</sub>

|                                           |                                |
|-------------------------------------------|--------------------------------|
| E (PBE-D3/ma-def2-svp GAS_OPT) =          | -991.2660452356                |
| E (PBE-D3/ma-def2-svp SMD_OPT) =          | -991.2930748849                |
| $\Delta G_{\text{corr}}$ (ID-RR-HR GAS) = | <b>0.2944698900</b>            |
| E (DLPNO-CCSDT/cc-p(wC)VTZ GAS_OPT GAS) = | -991.4234659777                |
| E (DLPNO-CCSDT/cc-p(wC)VTZ GAS_OPT SMD) = | -991.4442405503                |
| E (DLPNO-CCSDT/cc-p(wC)VTZ SMD_OPT SMD) = | -991.4455914176                |
| E (PBE-D3/ma-def2-tzvp GAS_OPT GAS) =     | -992.2981765643                |
| E (PBE-D3/ma-def2-tzvp GAS_OPT SMD) =     | -992.3241746836                |
| E (PBE-D3/ma-def2-tzvp GAS_OPT CPCM) =    | -992.3149284708                |
| GAS_OPT                                   | SMD_OPT                        |
| C -0.367494 0.452757 -0.653119            | C -0.577339 0.419265 -0.372853 |
| C -1.498735 0.204098 -1.443883            | C -1.880078 0.724874 -0.796663 |
| C -2.751210 0.117163 -0.813188            | C -2.833056 1.093153 0.166401  |
| N -2.928349 0.255331 0.512085             | N -2.562693 1.170604 1.484013  |
| C -1.835909 0.488463 1.260447             | C -1.309887 0.875913 1.881076  |
| C -0.539107 0.596392 0.731353             | C -0.287179 0.498694 0.996407  |
| H 0.630642 0.512686 -1.110597             | H 0.189312 0.107667 -1.100699  |
| H -1.411477 0.072028 -2.532994            | H -2.164172 0.672377 -1.858615 |
| H -3.661980 -0.076487 -1.408530           | H -3.866151 1.336029 -0.139230 |



|   |           |           |           |   |           |           |           |
|---|-----------|-----------|-----------|---|-----------|-----------|-----------|
| H | -2.002062 | 0.583761  | 2.348167  | H | -1.109668 | 0.937396  | 2.965341  |
| H | 0.320776  | 0.772740  | 1.394166  | H | 0.711029  | 0.253754  | 1.384377  |
| C | 4.151338  | 1.321947  | 1.491197  | C | 3.408642  | 1.383892  | 1.725398  |
| C | 3.550833  | 0.305094  | 2.248752  | C | 3.423829  | 0.097387  | 2.286577  |
| C | 2.915766  | -0.752578 | 1.574746  | C | 3.290575  | -1.009072 | 1.430594  |
| N | 2.856656  | -0.835825 | 0.231831  | N | 3.148296  | -0.898548 | 0.096376  |
| C | 3.431733  | 0.145022  | -0.488998 | C | 3.128774  | 0.339868  | -0.431947 |
| C | 4.087687  | 1.243615  | 0.091664  | C | 3.253915  | 1.509395  | 0.336161  |
| H | 4.656823  | 2.166986  | 1.984537  | H | 3.509154  | 2.276274  | 2.362732  |
| H | 3.568946  | 0.325695  | 3.348817  | H | 3.534171  | -0.052722 | 3.371047  |
| H | 2.404823  | -1.554171 | 2.138479  | H | 3.289645  | -2.032537 | 1.843018  |
| H | 3.341129  | 0.057858  | -1.586888 | H | 2.992376  | 0.404247  | -1.525858 |
| H | 4.536987  | 2.019680  | -0.546008 | H | 3.225953  | 2.496046  | -0.150215 |
| C | -2.364835 | -3.004401 | 1.240268  | C | -2.085661 | -2.697437 | 0.322119  |
| C | -2.173009 | -2.920991 | 2.627424  | C | -2.127801 | -2.528497 | 1.713364  |
| C | -0.864852 | -2.760229 | 3.112730  | C | -0.929150 | -2.643800 | 2.437545  |
| N | 0.216436  | -2.673663 | 2.318536  | N | 0.261940  | -2.902232 | 1.866101  |
| C | 0.020540  | -2.751973 | 0.989333  | C | 0.292421  | -3.053418 | 0.528157  |
| C | -1.244086 | -2.923832 | 0.402921  | C | -0.849069 | -2.964825 | -0.283952 |
| H | -3.376149 | -3.109646 | 0.819461  | H | -3.000985 | -2.610935 | -0.283433 |
| H | -3.022550 | -2.968970 | 3.324977  | H | -3.069883 | -2.304660 | 2.235616  |
| H | -0.679383 | -2.693117 | 4.199687  | H | -0.931997 | -2.516593 | 3.534610  |
| H | 0.920727  | -2.643056 | 0.360435  | H | 1.281756  | -3.241185 | 0.077623  |
| H | -1.343278 | -2.961085 | -0.691577 | H | -0.764730 | -3.096704 | -1.372347 |
| C | -0.254111 | -2.874742 | -4.124272 | C | 0.269489  | -3.529357 | -4.143692 |
| C | 0.526231  | -3.039993 | -2.970537 | C | 1.371879  | -3.406459 | -3.283995 |
| C | 1.377078  | -1.993088 | -2.576170 | C | 1.690281  | -2.136252 | -2.774499 |
| N | 1.487275  | -0.836884 | -3.257940 | N | 0.992870  | -1.023994 | -3.078228 |
| C | 0.740376  | -0.690372 | -4.365854 | C | -0.060680 | -1.151033 | -3.907375 |
| C | -0.147520 | -1.671781 | -4.839046 | C | -0.466882 | -2.376964 | -4.460228 |
| H | -0.935443 | -3.670883 | -4.462862 | H | -0.015496 | -4.509425 | -4.557131 |
| H | 0.481531  | -3.965781 | -2.377220 | H | 1.975568  | -4.281594 | -3.000136 |
| H | 1.981733  | -2.069561 | -1.654319 | H | 2.525627  | -2.010672 | -2.063296 |
| H | 0.851239  | 0.266133  | -4.907085 | H | -0.615788 | -0.225886 | -4.143060 |
| H | -0.738196 | -1.493260 | -5.750156 | H | -1.341580 | -2.420952 | -5.126434 |

## Li<sup>+</sup>(Py)<sub>4</sub>

|                                           |                     |
|-------------------------------------------|---------------------|
| E (PBE-D3/ma-def2-svp GAS_OPT) =          | -998.7081917678     |
| E (PBE-D3/ma-def2-svp SMD_OPT) =          | -998.7799741149     |
| $\Delta G_{\text{corr}}$ (ID-RR-HR GAS) = | <b>0.2997691200</b> |
| E (DLPNO-CCSDT/cc-p(wC)VTZ GAS_OPT GAS) = | -998.8809595026     |
| E (DLPNO-CCSDT/cc-p(wC)VTZ GAS_OPT SMD) = | -998.9439494420     |

|                                           |                                 |
|-------------------------------------------|---------------------------------|
| E (DLPNO-CCSDT/cc-p(wC)VTZ SMD_OPT SMD) = | -998.9438281017                 |
| E (PBE-D3/ma-def2-tzvp GAS_OPT GAS) =     | -999.7412526452                 |
| E (PBE-D3/ma-def2-tzvp GAS_OPT SMD) =     | -999.8138691632                 |
| E (PBE-D3/ma-def2-tzvp GAS_OPT CPCM) =    | -999.7977979346                 |
| GAS_OPT                                   | SMD_OPT                         |
| Li -0.001584 0.000573 0.001247            | Li 0.020111 -0.003539 -0.007723 |
| C -3.812008 0.921379 -2.874916            | C -3.816965 0.912761 -2.844602  |
| C -3.963514 0.106767 -1.742681            | C -3.958204 0.081333 -1.723216  |
| C -2.838308 -0.151084 -0.946556           | C -2.829754 -0.173392 -0.930431 |
| N -1.614844 0.347474 -1.219041            | N -1.613045 0.342840 -1.198622  |
| C -1.476547 1.127662 -2.311811            | C -1.483388 1.138939 -2.280511  |
| C -2.542205 1.443166 -3.166310            | C -2.553687 1.453202 -3.129805  |
| H -4.672574 1.145953 -3.523324            | H -4.680863 1.136510 -3.489179  |
| H -4.938478 -0.326403 -1.476795           | H -4.927468 -0.367362 -1.461416 |
| H -2.916487 -0.789547 -0.050690           | H -2.903219 -0.823347 -0.042763 |
| H -0.461304 1.510574 -2.512391            | H -0.474489 1.539423 -2.476663  |
| H -2.375529 2.084193 -4.044115            | H -2.393516 2.108398 -3.998393  |
| C 3.727033 -0.960024 -2.967522            | C 3.683724 -1.055534 -3.025791  |
| C 3.910958 -0.129854 -1.851517            | C 3.881386 -0.156609 -1.966769  |
| C 2.809086 0.139454 -1.027036             | C 2.801273 0.129572 -1.119184   |
| N 1.578323 -0.362307 -1.257378            | N 1.579389 -0.419691 -1.275929  |
| C 1.408674 -1.157334 -2.334947            | C 1.395755 -1.282086 -2.297849  |
| C 2.449383 -1.485181 -3.215203            | C 2.414972 -1.630765 -3.195405  |
| H 4.568702 -1.193988 -3.637073            | H 4.508370 -1.304390 -3.711310  |
| H 4.893149 0.306598 -1.619814             | H 4.857141 0.320779 -1.795160   |
| H 2.913005 0.790051 -0.142589             | H 2.919108 0.833942 -0.279139   |
| H 0.387957 -1.542165 -2.501211            | H 0.384315 -1.709240 -2.404024  |
| H 2.257523 -2.138165 -4.078943            | H 2.212026 -2.339644 -4.011482  |
| C 0.991196 3.789257 2.881735              | C 1.027210 3.812599 2.827973    |
| C 1.515520 2.515989 3.152907              | C 1.610736 2.557778 3.060831    |
| C 1.177669 1.457026 2.298641              | C 1.274415 1.494566 2.211006    |
| N 0.373506 1.604927 1.224633              | N 0.415642 1.622843 1.177848    |
| C -0.127472 2.831564 0.971667             | C -0.143243 2.830993 0.961162   |
| C 0.151751 3.950670 1.769215              | C 0.131150 3.952457 1.757356    |
| H 1.233002 4.644789 3.530602              | H 1.267994 4.671148 3.473549    |
| H 2.175502 2.341561 4.015021              | H 2.316964 2.399198 3.888856    |
| H 1.562007 0.439372 2.483692              | H 1.708817 0.492588 2.366176    |
| H -0.785858 2.917557 0.091057             | H -0.844935 2.902759 0.113696   |
| H -0.284317 4.928636 1.519587             | H -0.351751 4.915557 1.536933   |
| C -0.903262 -3.751639 2.958608            | C -0.926708 -3.661200 3.051695  |
| C -0.098196 -3.926901 1.822981            | C -0.097661 -3.870388 1.939286  |
| C 0.154509 -2.818226 1.002445             | C 0.164368 -2.789473 1.085116   |
| N -0.340530 -1.588930 1.254293            | N -0.342165 -1.555762 1.285543  |
| C -1.111622 -1.427715 2.350371            | C -1.136127 -1.360501 2.359350  |
| C -1.421167 -2.475582 3.228776            | C -1.457523 -2.380017 3.266743  |
| H -1.123463 -4.598736 3.625979            | H -1.155722 -4.486342 3.743501  |
| H 0.331511 -4.907614 1.573106             | H 0.343244 -4.855955 1.730808   |

|   |           |           |          |   |           |           |          |
|---|-----------|-----------|----------|---|-----------|-----------|----------|
| H | 0.785946  | -2.915077 | 0.103428 | H | 0.812507  | -2.916475 | 0.202309 |
| H | -1.492052 | -0.408241 | 2.533470 | H | -1.528852 | -0.339394 | 2.500811 |
| H | -2.054591 | -2.290480 | 4.108405 | H | -2.111506 | -2.168428 | 4.125378 |

## TMS

|                                           |                                |
|-------------------------------------------|--------------------------------|
| E (PBE-D3/ma-def2-svp GAS_OPT) =          | -704.9740293780                |
| E (PBE-D3/ma-def2-svp SMD_OPT) =          | -704.9921572598                |
| $\Delta G_{\text{corr}}$ (ID-RR-HR GAS) = | <b>0.0874757200</b>            |
| E (DLPNO-CCSDT/cc-p(wC)VTZ GAS_OPT GAS) = | -704.9410165271                |
| E (DLPNO-CCSDT/cc-p(wC)VTZ GAS_OPT SMD) = | -704.9562194056                |
| E (DLPNO-CCSDT/cc-p(wC)VTZ SMD_OPT SMD) = | -704.9563158596                |
| E (PBE-D3/ma-def2-tzvp GAS_OPT GAS) =     | -705.4885023715                |
| E (PBE-D3/ma-def2-tzvp GAS_OPT SMD) =     | -705.5048317128                |
| E (PBE-D3/ma-def2-tzvp GAS_OPT CPCM) =    | -705.5062004972                |
| <b>GAS_OPT</b>                            | <b>SMD_OPT</b>                 |
| H 3.586927 2.116087 -0.781404             | H 3.588949 2.119484 -0.789095  |
| S 1.235130 2.601058 -0.808546             | S 1.242219 2.591537 -0.818382  |
| C 0.600042 1.308370 -1.973317             | C 0.603171 1.308189 -1.974235  |
| C 1.848542 0.721645 -2.631143             | C 1.851685 0.720319 -2.629077  |
| C 2.837641 1.887101 -2.846886             | C 2.835788 1.885495 -2.849148  |
| C 2.945466 2.636433 -1.519176             | C 2.943197 2.638456 -1.524225  |
| H 0.002713 0.599227 -1.371115             | H -0.004389 0.599307 -1.381358 |
| H -0.052531 1.845118 -2.689288            | H -0.042972 1.845764 -2.695554 |
| H 1.596846 0.217011 -3.585591             | H 1.588083 0.221159 -3.582286  |
| H 2.305037 -0.043026 -1.967410            | H 2.308032 -0.046104 -1.967959 |
| H 2.453931 2.566326 -3.637489             | H 2.454555 2.560607 -3.643698  |
| H 3.830180 1.524270 -3.181845             | H 3.833070 1.524908 -3.169563  |
| H 3.238958 3.699555 -1.596441             | H 3.241317 3.700548 -1.602381  |
| O 1.286072 2.049258 0.574381              | O 1.282826 2.058453 0.583207   |
| O 0.549679 3.894733 -1.084359             | O 0.539105 3.895046 -1.055872  |

**(TMS)<sub>4</sub>**

|                                           |                                |
|-------------------------------------------|--------------------------------|
| E (PBE-D3/ma-def2-svp GAS_OPT) =          | -2819.9655123684               |
| E (PBE-D3/ma-def2-svp SMD_OPT) =          | -2819.9997183874               |
| $\Delta G_{corr}$ (ID-RR-HR GAS) =        | <b>0.4168278200</b>            |
| E (DLPNO-CCSDT/cc-p(wC)VTZ GAS_OPT GAS) = | -2819.8292060678               |
| E (DLPNO-CCSDT/cc-p(wC)VTZ GAS_OPT SMD) = | -2819.8565368229               |
| E (DLPNO-CCSDT/cc-p(wC)VTZ SMD_OPT SMD) = | -2819.8554262230               |
| E (PBE-D3/ma-def2-tzvp GAS_OPT GAS) =     | -2822.0040533856               |
| E (PBE-D3/ma-def2-tzvp GAS_OPT SMD) =     | -2822.0331109070               |
| E (PBE-D3/ma-def2-tzvp GAS_OPT CPCM) =    | -2822.0377741407               |
| <b>GAS_OPT</b>                            | <b>SMD_OPT</b>                 |
| H 1.158686 0.545460 -2.778668             | H 1.579285 0.358278 -2.908655  |
| S 2.085097 -0.242683 -0.735400            | S 2.376638 -0.388093 -0.789422 |
| C 2.906142 -1.842327 -1.092459            | C 2.972906 -2.091500 -1.142221 |
| C 2.620102 -2.076212 -2.574633            | C 2.450314 -2.400041 -2.544460 |
| C 1.142809 -1.686390 -2.797235            | C 1.048275 -1.770208 -2.652455 |
| C 0.898085 -0.322126 -2.144293            | C 1.148108 -0.329178 -2.155931 |
| H 3.969608 -1.723642 -0.814846            | H 4.073790 -2.080854 -1.035790 |
| H 2.401962 -2.603373 -0.464621            | H 2.525258 -2.743658 -0.363938 |
| H 2.797077 -3.138414 -2.835501            | H 2.418458 -3.495130 -2.709381 |
| H 3.293302 -1.456341 -3.204722            | H 3.125668 -1.967669 -3.312076 |
| H 0.496235 -2.447428 -2.316978            | H 0.325765 -2.342417 -2.035612 |
| H 0.886680 -1.653006 -3.874981            | H 0.670896 -1.789136 -3.693719 |
| H -0.116669 -0.197676 -1.724590           | H 0.208972 0.091087 -1.754298  |
| O 3.075711 0.861307 -0.960344             | O 3.475699 0.605690 -1.022687  |
| O 1.373596 -0.284113 0.586684             | O 1.687501 -0.356918 0.549404  |
| H 2.611278 5.085768 -0.909511             | H 2.608483 5.217161 -0.034962  |
| S 0.941598 3.581791 -0.122647             | S 0.853566 3.605288 0.100721   |
| C 1.437417 2.908766 1.510634              | C 1.144133 2.700634 1.671916   |
| C 2.727837 3.663798 1.818986              | C 2.473031 3.255551 2.180530   |
| C 3.565165 3.659258 0.519502              | C 3.394302 3.396585 0.951782   |
| C 2.653618 4.006794 -0.666697             | C 2.607179 4.115503 -0.145903  |
| H 0.597445 3.104850 2.202904              | H 0.272977 2.880031 2.329220   |
| H 1.585349 1.818019 1.373652              | H 1.216584 1.628842 1.394681   |
| H 3.278652 3.176638 2.648197              | H 2.909440 2.571643 2.935448   |
| H 2.495275 4.701601 2.139481              | H 2.321327 4.239295 2.673118   |
| H 3.976238 2.644362 0.356565              | H 3.694360 2.392848 0.589535   |
| H 4.412820 4.369616 0.585450              | H 4.314341 3.963191 1.196450   |
| H 2.855662 3.403110 -1.569823             | H 2.887276 3.842003 -1.179889  |
| O 0.168818 4.843773 0.098645              | O 0.007840 4.819285 0.356767   |

|   |           |           |           |   |           |           |           |
|---|-----------|-----------|-----------|---|-----------|-----------|-----------|
| O | 0.330946  | 2.524623  | -0.990800 | O | 0.404212  | 2.660630  | -0.977230 |
| H | -1.719511 | -5.923049 | 1.201117  | H | -0.542865 | -5.302250 | 2.583226  |
| S | 0.014743  | -4.312361 | 0.865567  | S | -0.086494 | -4.205545 | 0.504918  |
| C | -0.621356 | -2.783003 | 1.668281  | C | -0.811904 | -2.539873 | 0.792929  |
| C | -2.055719 | -3.134958 | 2.059498  | C | -1.662459 | -2.699109 | 2.053037  |
| C | -2.647352 | -3.935522 | 0.881006  | C | -2.297407 | -4.101704 | 1.998698  |
| C | -1.651778 | -5.043339 | 0.531705  | C | -1.173711 | -5.091045 | 1.697640  |
| H | 0.067629  | -2.553168 | 2.501641  | H | 0.024365  | -1.816891 | 0.861398  |
| H | -0.566220 | -1.987951 | 0.900108  | H | -1.418740 | -2.324334 | -0.107715 |
| H | -2.655279 | -2.222132 | 2.243736  | H | -2.439831 | -1.911753 | 2.093315  |
| H | -2.064552 | -3.742508 | 2.989600  | H | -1.031081 | -2.598771 | 2.960386  |
| H | -2.783521 | -3.253438 | 0.017483  | H | -3.067337 | -4.139693 | 1.199675  |
| H | -3.641114 | -4.356710 | 1.131744  | H | -2.796205 | -4.363444 | 2.952546  |
| H | -1.655657 | -5.368107 | -0.525069 | H | -1.485285 | -6.039409 | 1.221684  |
| O | 0.740403  | -5.149698 | 1.864749  | O | 1.340599  | -4.247864 | 0.972562  |
| O | 0.691146  | -3.979586 | -0.430389 | O | -0.370791 | -4.654416 | -0.898401 |
| H | -0.866119 | 1.088240  | 0.564283  | H | -0.989698 | 1.090741  | 0.223283  |
| S | -2.933169 | 0.013620  | 0.017591  | S | -3.016833 | 0.110235  | -0.561362 |
| C | -3.709677 | 1.349197  | -0.997123 | C | -3.899823 | 1.604819  | -1.175580 |
| C | -2.958417 | 2.627480  | -0.617147 | C | -3.141025 | 2.782941  | -0.566508 |
| C | -2.535625 | 2.505715  | 0.862146  | C | -2.684078 | 2.351988  | 0.839749  |
| C | -1.875168 | 1.135833  | 1.018131  | C | -1.992481 | 0.998834  | 0.682870  |
| H | -3.618216 | 1.045481  | -2.056275 | H | -3.900068 | 1.559078  | -2.280408 |
| H | -4.774622 | 1.353178  | -0.693329 | H | -4.936113 | 1.516518  | -0.794941 |
| H | -3.589535 | 3.522175  | -0.786613 | H | -3.787855 | 3.681373  | -0.530679 |
| H | -2.045147 | 2.737931  | -1.235044 | H | -2.252715 | 3.029477  | -1.182961 |
| H | -3.417520 | 2.586169  | 1.532680  | H | -3.554670 | 2.262192  | 1.522505  |
| H | -1.836760 | 3.322476  | 1.130634  | H | -1.996064 | 3.097740  | 1.282828  |
| H | -1.858173 | 0.723661  | 2.044162  | H | -1.948508 | 0.378308  | 1.596450  |
| O | -2.088631 | -0.879627 | -0.840242 | O | -2.137826 | -0.464819 | -1.635233 |
| O | -3.971622 | -0.611805 | 0.893415  | O | -3.979142 | -0.818145 | 0.120007  |

## Li<sup>+</sup>(TMS)<sub>4</sub>

|                                           |                     |
|-------------------------------------------|---------------------|
| E (PBE-D3/ma-def2-svp GAS_OPT) =          | -2827.3949729456    |
| E (PBE-D3/ma-def2-svp SMD_OPT) =          | -2827.4745075234    |
| $\Delta G_{\text{corr}}$ (ID-RR-HR GAS) = | <b>0.4197485300</b> |
| E (DLPNO-CCSDT/cc-p(wC)VTZ GAS_OPT GAS) = | -2827.2742541102    |
| E (DLPNO-CCSDT/cc-p(wC)VTZ GAS_OPT SMD) = | -2827.3482905134    |
| E (DLPNO-CCSDT/cc-p(wC)VTZ SMD_OPT SMD) = | -2827.3499407970    |
| E (PBE-D3/ma-def2-tzvp GAS_OPT GAS) =     | -2829.4316861564    |

|                                        |                                 |
|----------------------------------------|---------------------------------|
| E (PBE-D3/ma-def2-tzvp GAS_OPT SMD) =  | -2829.5063859289                |
| E (PBE-D3/ma-def2-tzvp GAS_OPT CPCM) = | -2829.5057147119                |
| GAS_OPT                                | SMD_OPT                         |
| H 2.713377 2.247942 0.834034           | H 1.270981 4.290026 0.264377    |
| S 1.778553 1.078206 2.720355           | S 0.780776 2.854637 2.098783    |
| C 2.250145 1.898340 4.290231           | C 2.045483 3.394577 3.315400    |
| C 3.738083 2.193063 4.106793           | C 3.063606 4.184227 2.491645    |
| C 3.911409 2.715876 2.664629           | C 3.154495 3.512055 1.108431    |
| C 3.166320 1.766360 1.718790           | C 1.724844 3.337599 0.602452    |
| H 1.630065 2.814236 4.357024           | H 1.522494 3.966957 4.103826    |
| H 1.991514 1.199463 5.107392           | H 2.463284 2.461493 3.740331    |
| H 4.332282 1.268089 4.261202           | H 4.042714 4.196358 3.008646    |
| H 4.086298 2.933757 4.853332           | H 2.729891 5.236625 2.380720    |
| H 4.980196 2.784966 2.382616           | H 3.655340 2.524530 1.188641    |
| H 3.486104 3.737971 2.586905           | H 3.738798 4.123545 0.393329    |
| H 3.754009 0.886797 1.392723           | H 1.582320 2.556768 -0.167486   |
| O 0.456076 1.624011 2.243795           | O -0.486606 3.641893 2.227357   |
| O 1.919731 -0.400937 2.856243          | O 0.658758 1.347579 2.179179    |
| Li -0.556379 0.838306 0.783152         | Li 0.051389 0.187925 0.757906   |
| H 0.510228 -1.861957 -2.183979         | H 3.116136 -2.405957 -1.414167  |
| S 1.858209 0.020695 -1.510842          | S 2.005156 -0.301582 -1.602258  |
| C 1.734369 1.401007 -2.711918          | C 0.713219 -0.671519 -2.856186  |
| C 1.800214 0.703301 -4.070910          | C 1.154113 -1.993951 -3.481720  |
| C 0.931957 -0.568267 -3.957922         | C 2.693097 -1.990165 -3.541319  |
| C 1.332115 -1.304627 -2.674473         | C 3.191115 -1.586068 -2.155189  |
| H 0.746785 1.869791 -2.533565          | H -0.255354 -0.711425 -2.328136 |
| H 2.562487 2.099057 -2.488555          | H 0.735885 0.178221 -3.565218   |
| H 2.850373 0.444323 -4.322390          | H 0.704998 -2.107158 -4.487612  |
| H 1.426114 1.376598 -4.866977          | H 0.795254 -2.842773 -2.863097  |
| H 1.060900 -1.228667 -4.837712         | H 3.046887 -1.265148 -4.303504  |
| H -0.135723 -0.278434 -3.901367        | H 3.095301 -2.984787 -3.815260  |
| H 2.228779 -1.944124 -2.791835         | H 4.201989 -1.139280 -2.118511  |
| O 0.833103 0.187737 -0.417381          | O 1.511457 -0.667707 -0.218240  |
| O 3.267883 -0.182927 -1.073258         | O 2.566280 1.073024 -1.779534   |
| H -3.602638 -0.145382 -0.277017        | H -2.721885 -0.442423 -1.151966 |
| S -2.448331 1.482118 -1.575719         | S -1.979766 1.846806 -1.236024  |
| C -3.816867 2.650108 -1.963352         | C -2.793617 3.057555 -0.117620  |
| C -5.097693 1.863886 -1.670389         | C -4.074953 2.362356 0.360702   |
| C -4.828258 0.389698 -2.040221         | C -3.849054 0.837152 0.311213   |
| C -3.511007 -0.002998 -1.371704        | C -3.233767 0.534485 -1.051321  |
| H -3.658088 3.554105 -1.346921         | H -2.059214 3.248497 0.691103   |
| H -3.691318 2.893618 -3.036453         | H -2.956947 3.982723 -0.700851  |
| H -5.949966 2.281812 -2.241349         | H -4.919279 2.630464 -0.305924  |
| H -5.354577 1.943345 -0.593537         | H -4.334667 2.701103 1.382288   |
| H -4.749706 0.275263 -3.141945         | H -4.799107 0.281571 0.434842   |
| H -5.649616 -0.272281 -1.702144        | H -3.165927 0.507391 1.122244   |
| H -2.962849 -0.858974 -1.807686        | H -3.952237 0.676112 -1.883255  |
| O -1.832794 1.867026 -0.254963         | O -0.700600 1.379905 -0.573238  |
| O -1.540850 1.333717 -2.752156         | O -1.851742 2.334038 -2.640522  |
| H 1.244737 -1.807345 1.315515          | H 0.980306 -3.077956 1.376259   |
| S -1.022124 -2.250034 0.606420         | S -1.153217 -2.579326 0.431612  |

|   |           |           |           |   |           |           |           |
|---|-----------|-----------|-----------|---|-----------|-----------|-----------|
| C | -1.898985 | -3.537733 | 1.589529  | C | -2.291515 | -3.747610 | 1.258817  |
| C | -0.794373 | -4.484594 | 2.065484  | C | -1.366835 | -4.694424 | 2.020930  |
| C | 0.456152  | -3.624421 | 2.340425  | C | -0.153029 | -4.959404 | 1.110177  |
| C | 0.674230  | -2.733759 | 1.118446  | C | 0.361202  | -3.603508 | 0.624772  |
| H | -2.386443 | -2.987814 | 2.417943  | H | -2.989510 | -3.150417 | 1.874349  |
| H | -2.661666 | -3.988095 | 0.927502  | H | -2.842511 | -4.253906 | 0.442003  |
| H | -0.574119 | -5.238142 | 1.280687  | H | -1.903370 | -5.630554 | 2.270117  |
| H | -1.120280 | -5.039268 | 2.967246  | H | -1.041977 | -4.230480 | 2.975355  |
| H | 1.351938  | -4.248667 | 2.527114  | H | -0.457380 | -5.583453 | 0.244720  |
| H | 0.308828  | -2.990835 | 3.239882  | H | 0.651844  | -5.499409 | 1.645484  |
| H | 1.091171  | -3.282059 | 0.250694  | H | 0.881272  | -3.615920 | -0.349883 |
| O | -1.396955 | -0.903320 | 1.174054  | O | -1.042879 | -1.329824 | 1.280071  |
| O | -1.223129 | -2.458927 | -0.861515 | O | -1.513736 | -2.382065 | -1.010037 |

## Li<sup>+</sup> in TMS

|                                           |                |
|-------------------------------------------|----------------|
| E (PBE-D3/ma-def2-svp GAS_OPT) =          | -7.2519251623  |
| E (PBE-D3/ma-def2-svp SMD_OPT) =          | -7.3917970144  |
| $\Delta G_{\text{corr}}$ (ID-RR-HR GAS) = | -0.0127326619  |
| E (DLPNO-CCSDT/cc-p(wC)VTZ GAS_OPT GAS) = | -7.2736440090  |
| E (DLPNO-CCSDT/cc-p(wC)VTZ GAS_OPT SMD) = | -7.4156879765  |
| E (DLPNO-CCSDT/cc-p(wC)VTZ SMD_OPT SMD) = | -7.4156879765  |
| E (PBE-D3/ma-def2-tzvp GAS_OPT GAS) =     | -7.2566456293  |
| E (PBE-D3/ma-def2-tzvp GAS_OPT SMD) =     | -7.3956692142  |
| E (PBE-D3/ma-def2-tzvp GAS_OPT CPCM) =    | -7.4407977109  |
| GAS_OPT                                   | SMD_OPT        |
| Li 0.0 0.0 0.0                            | Li 0.0 0.0 0.0 |
